# Supplementary material
Source: PubMed Central journal article supplement (PMC4892411)

# Supplementary Figure 1

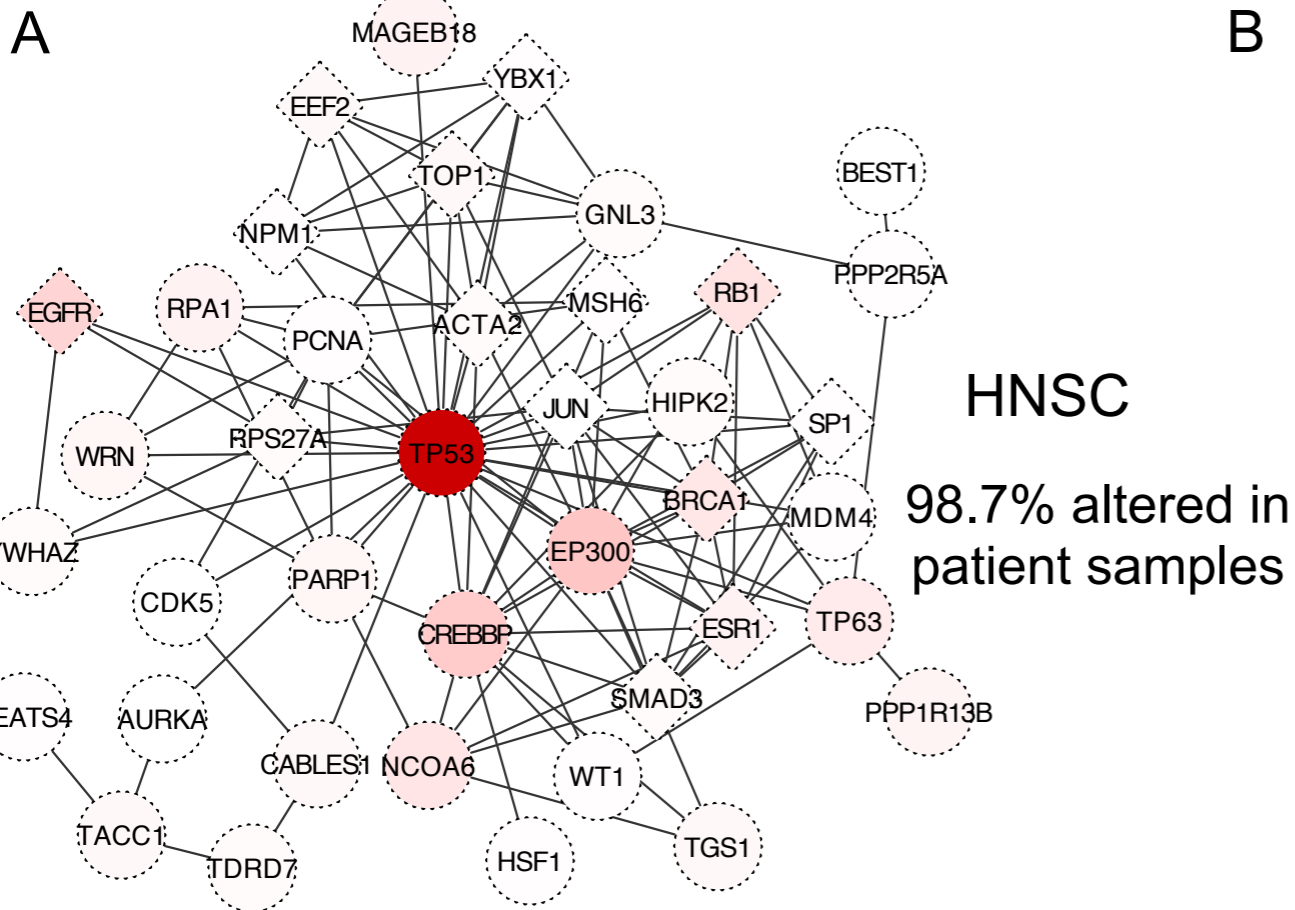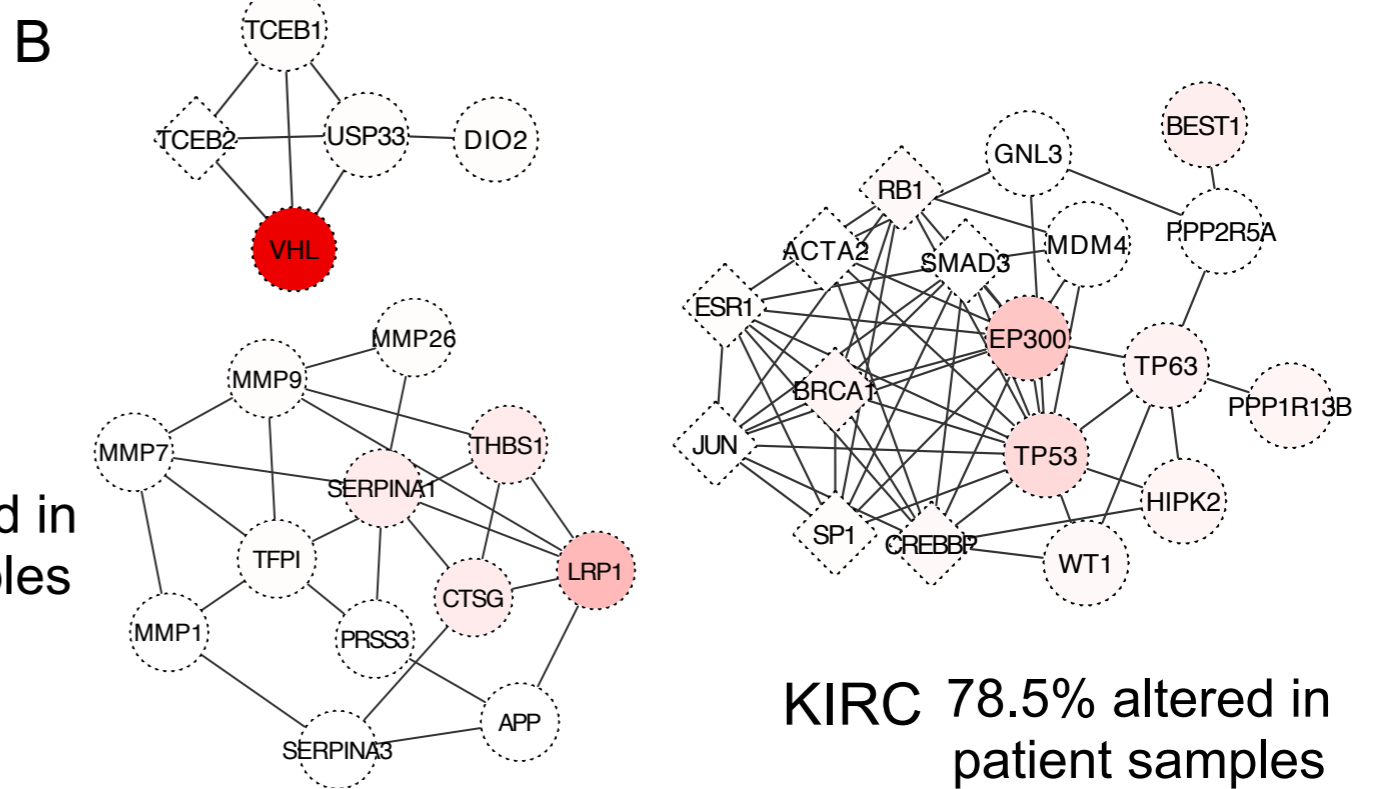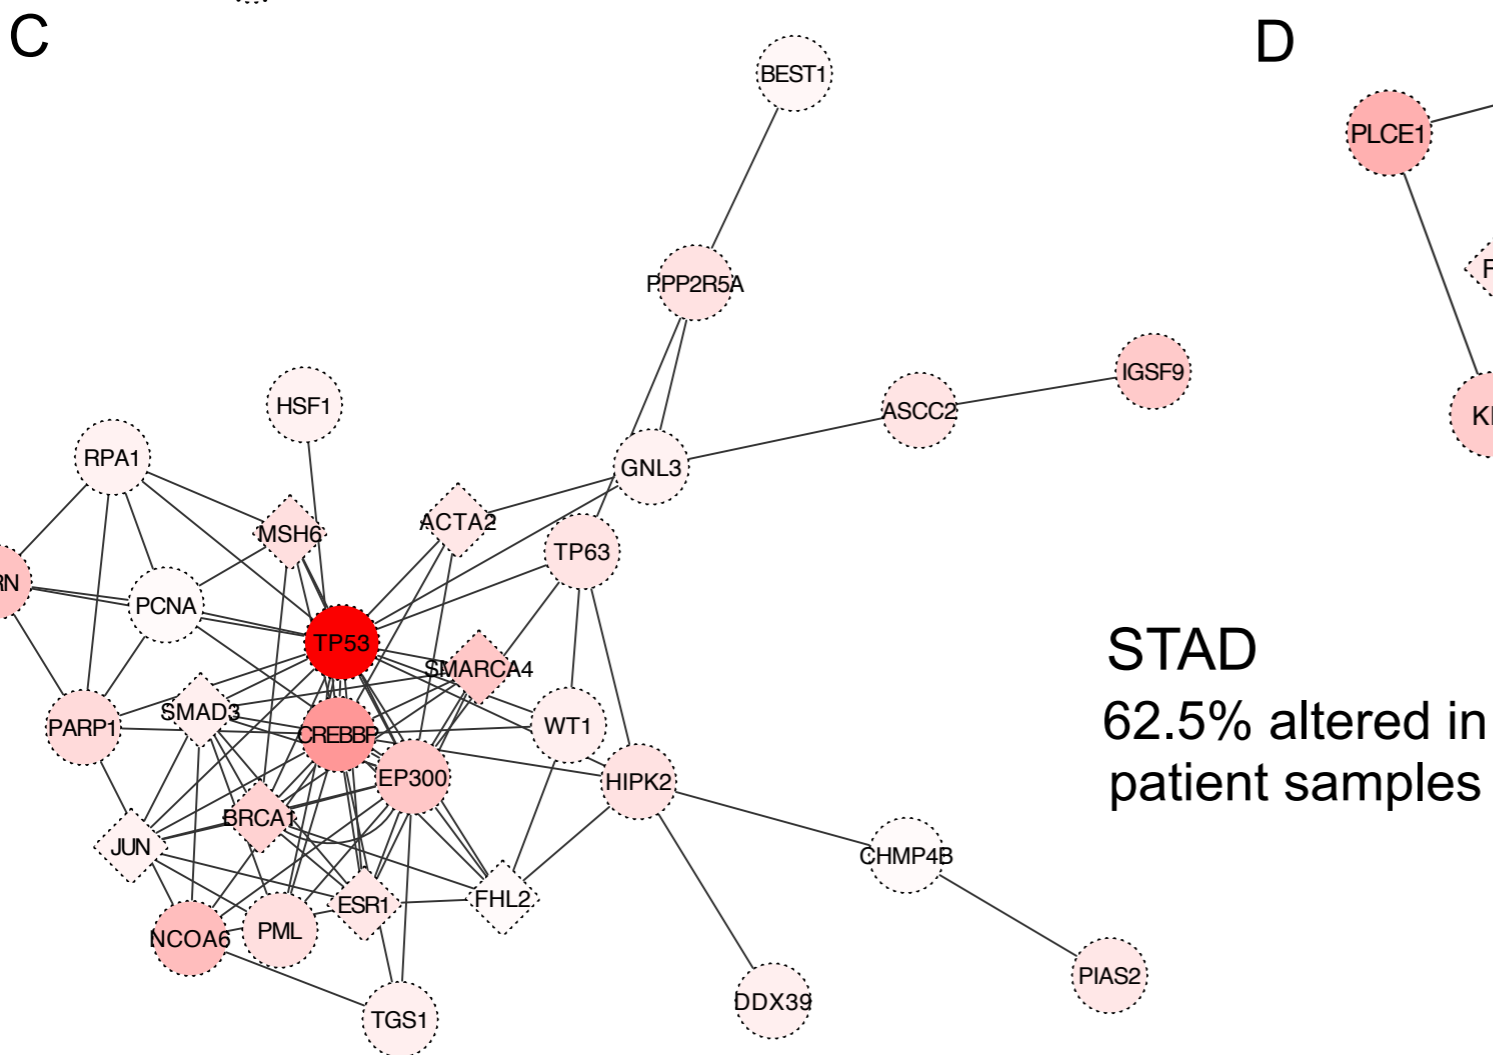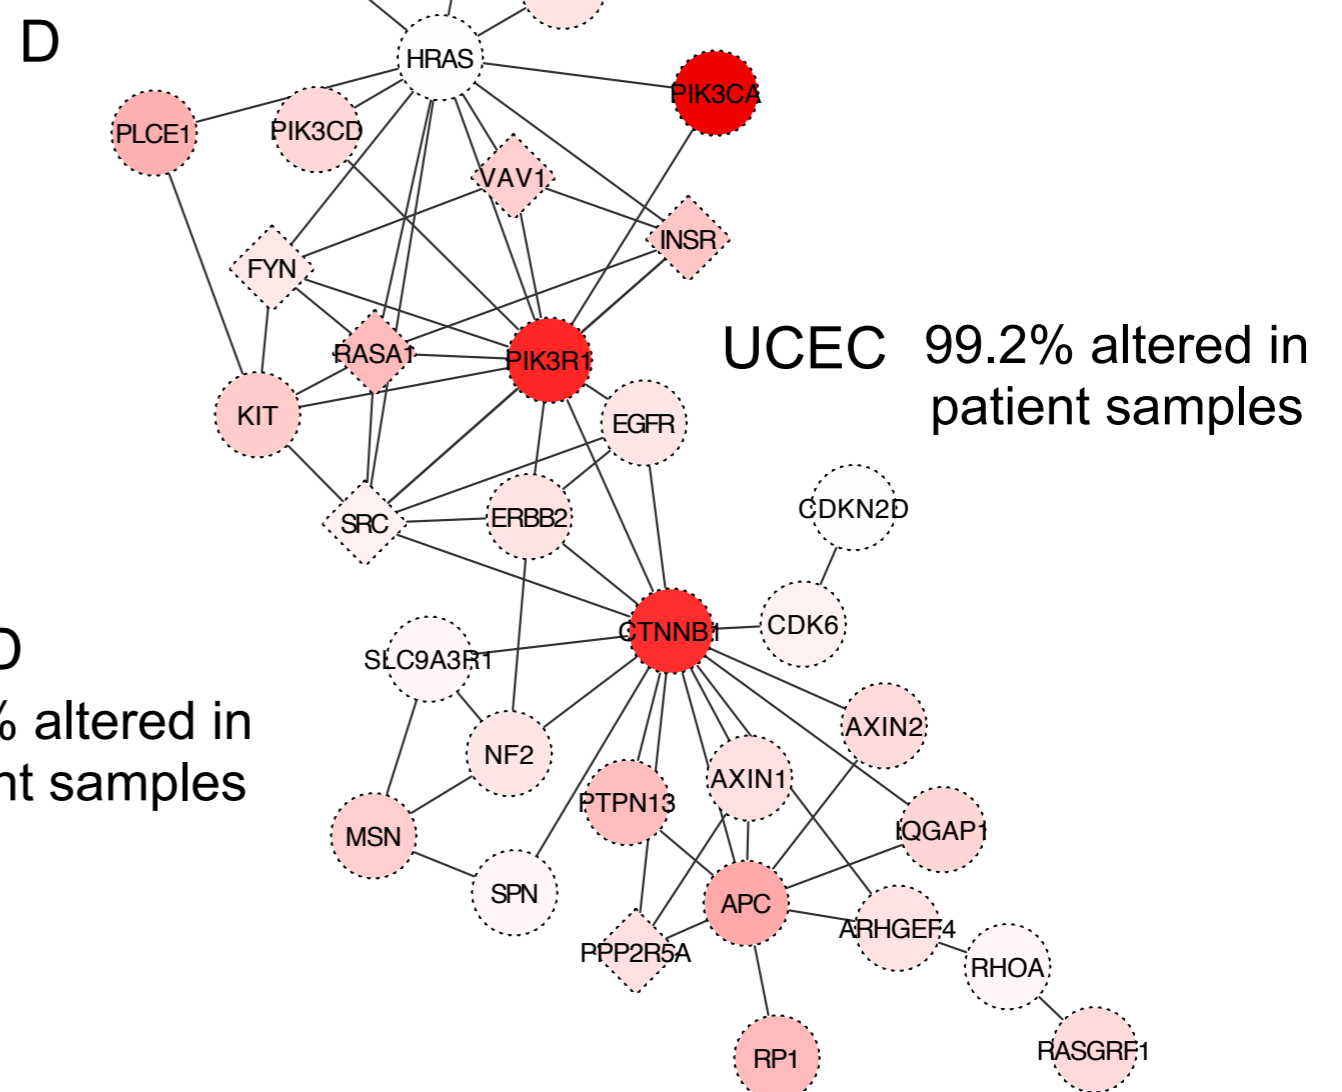

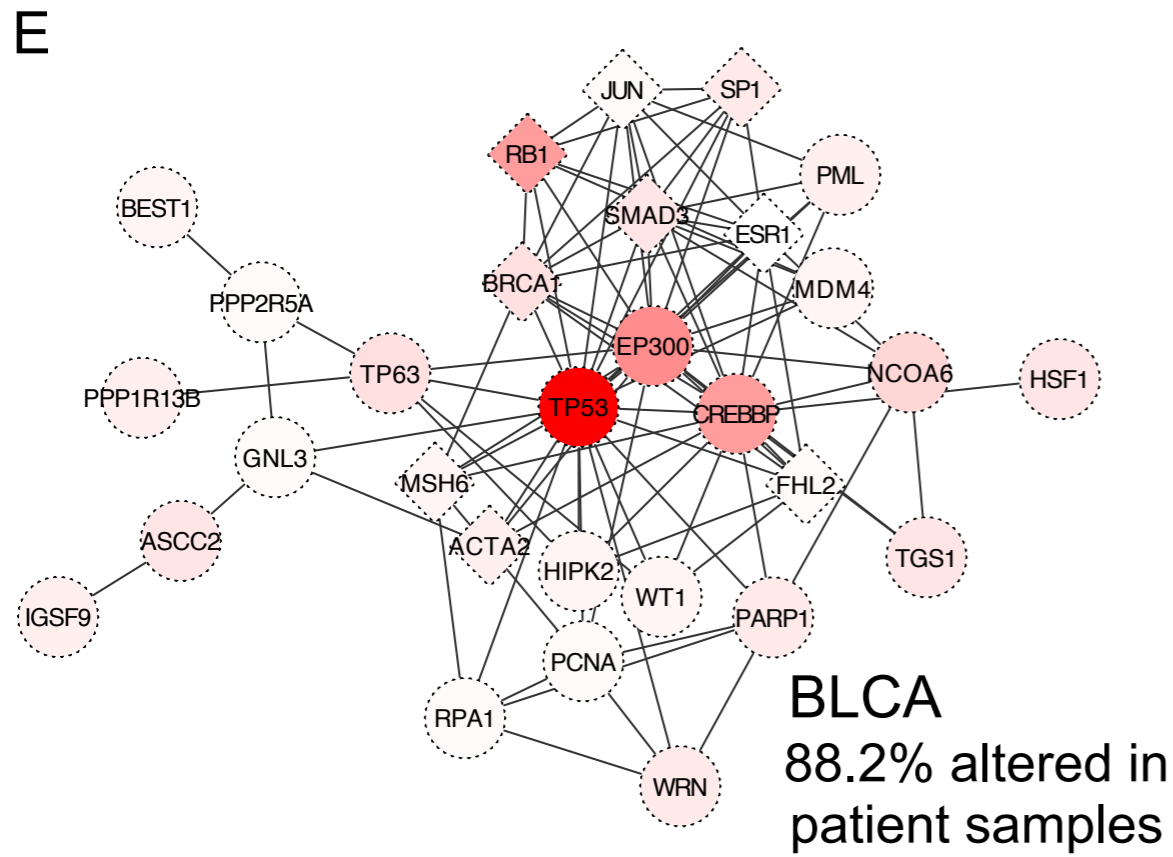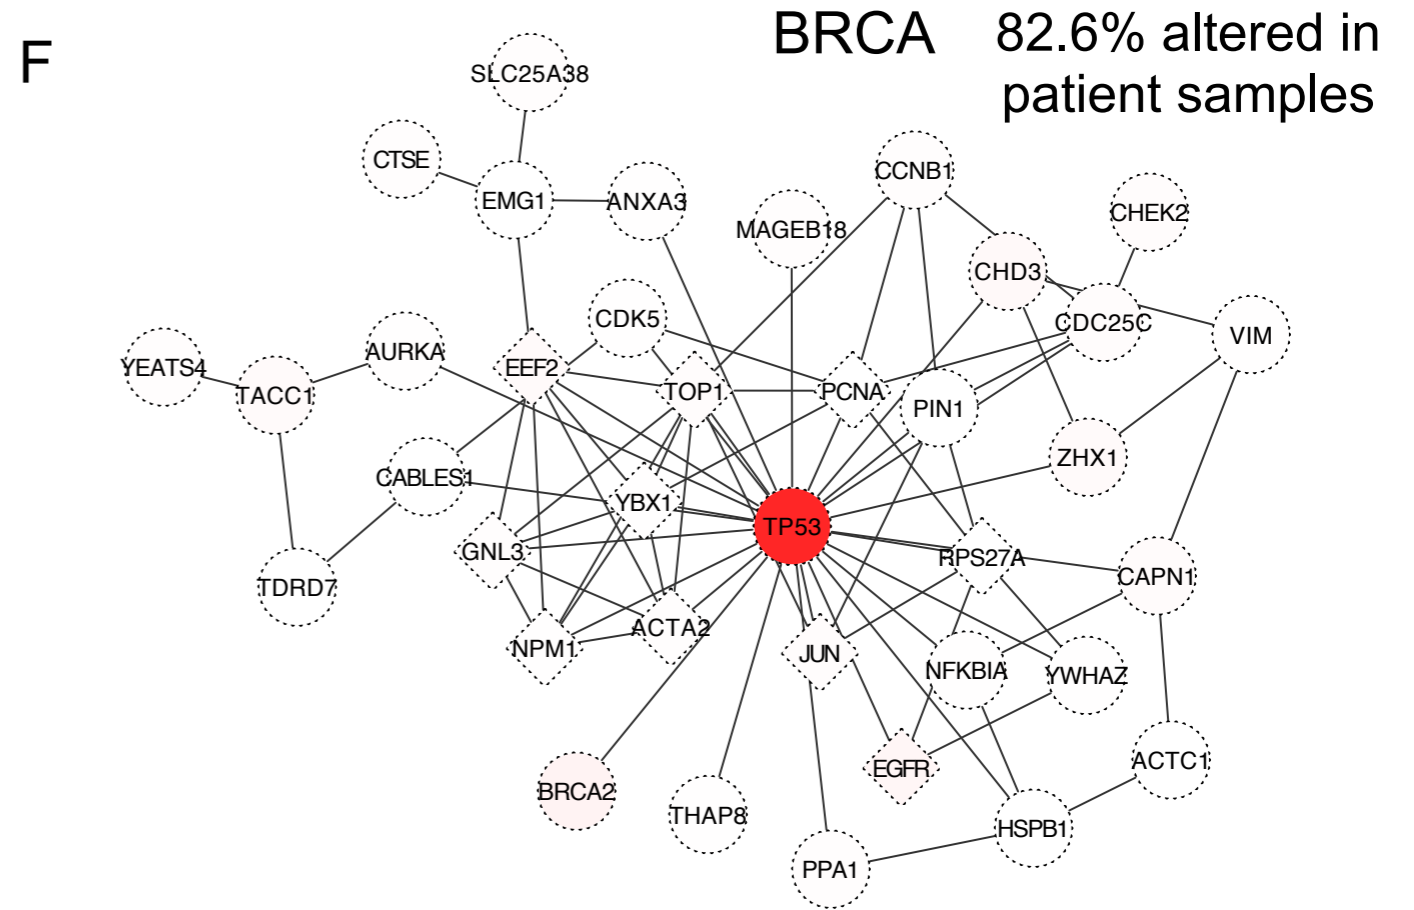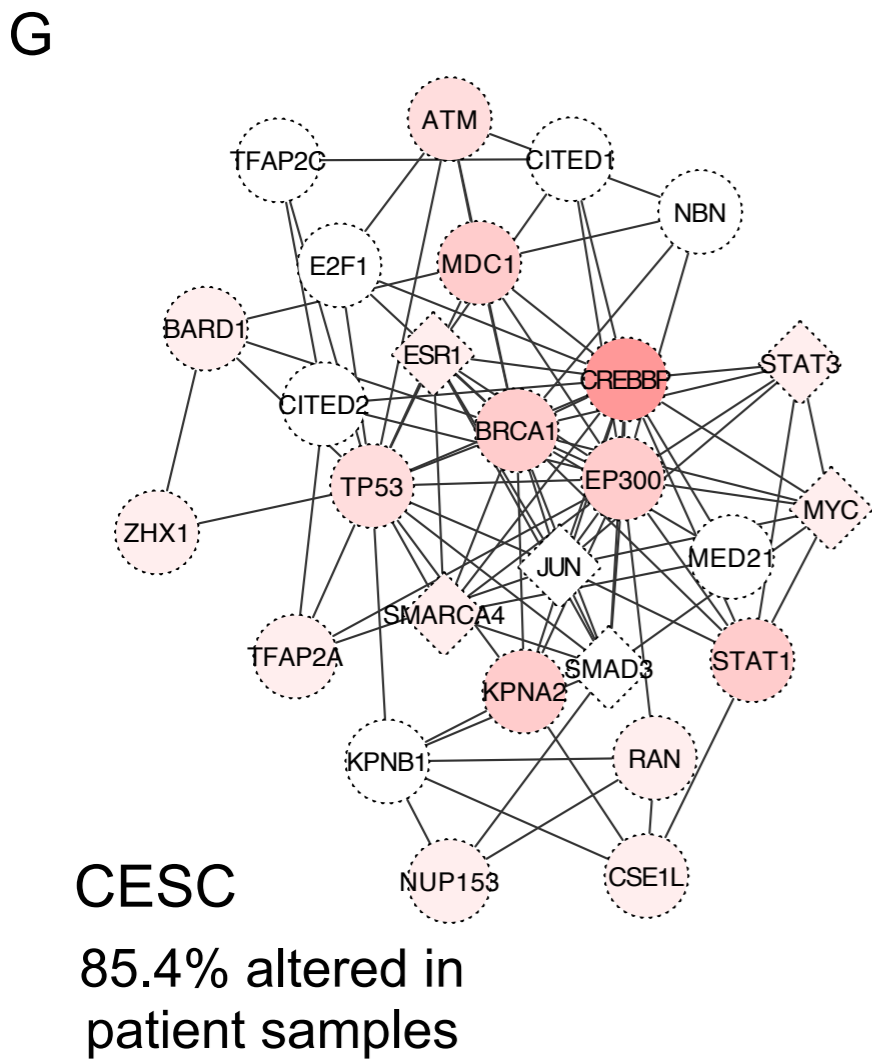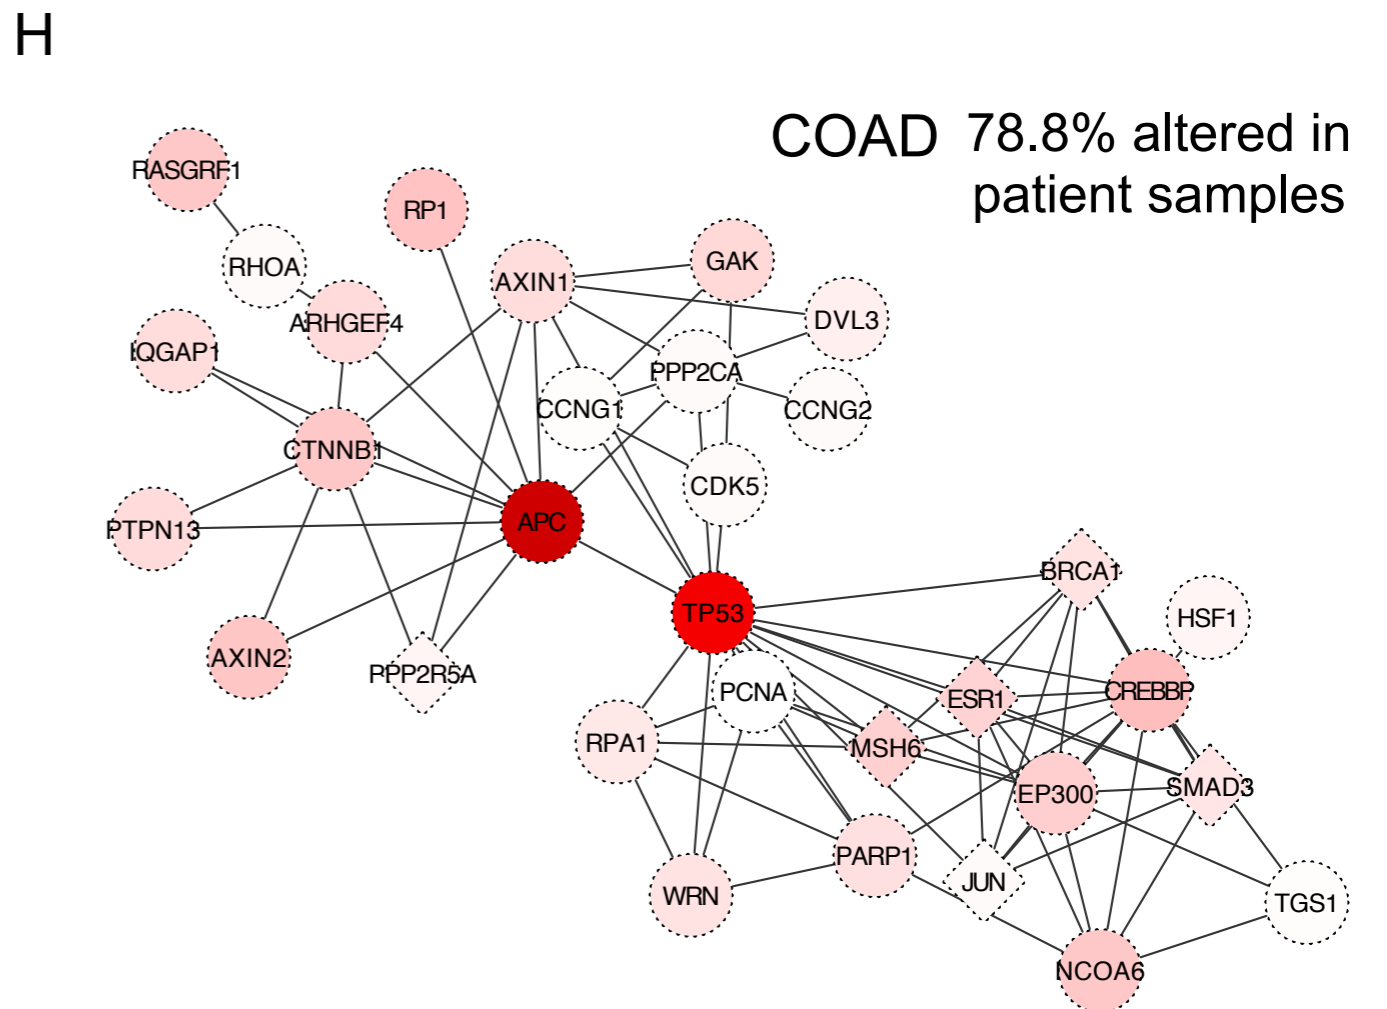

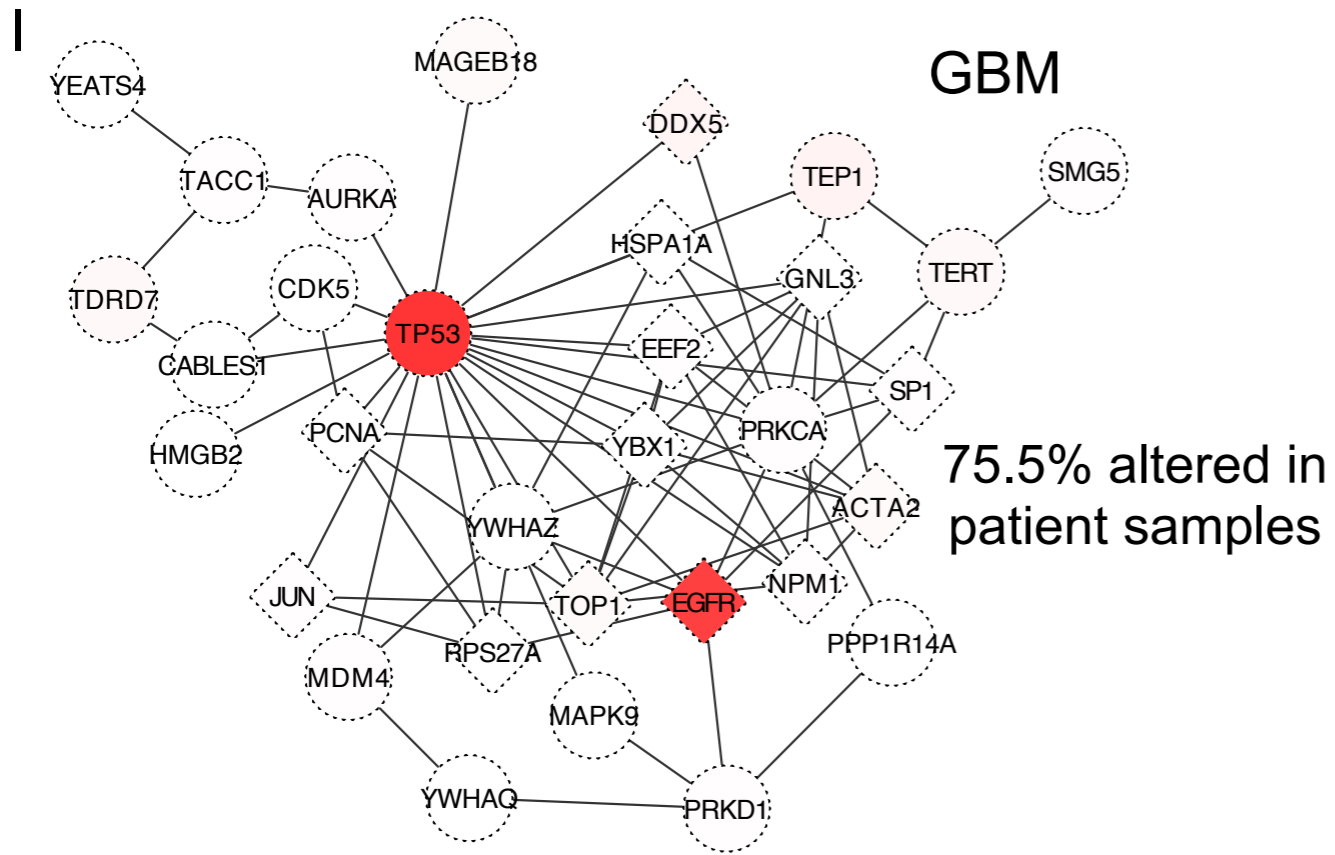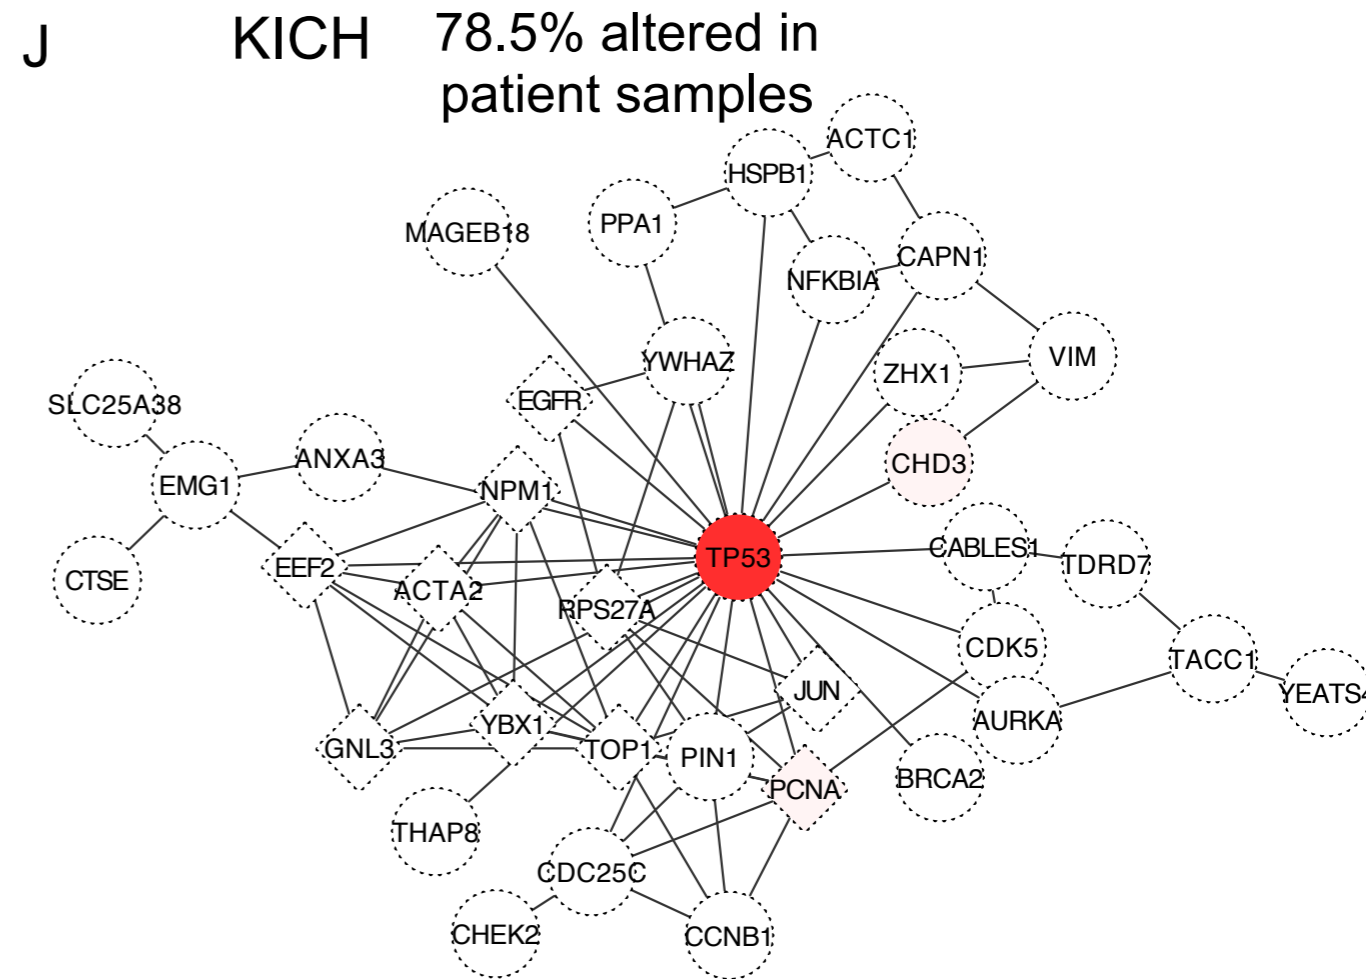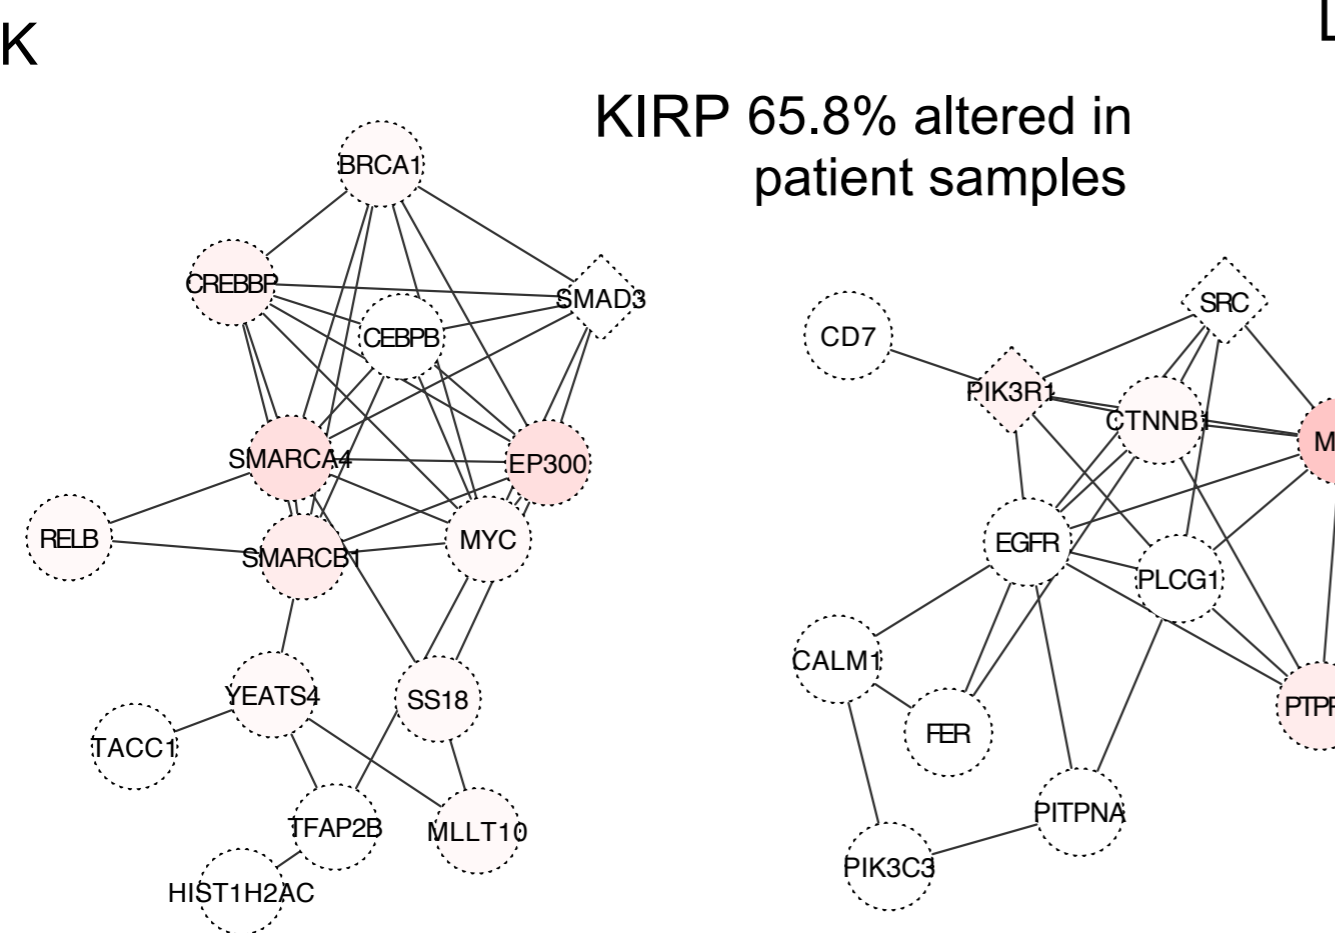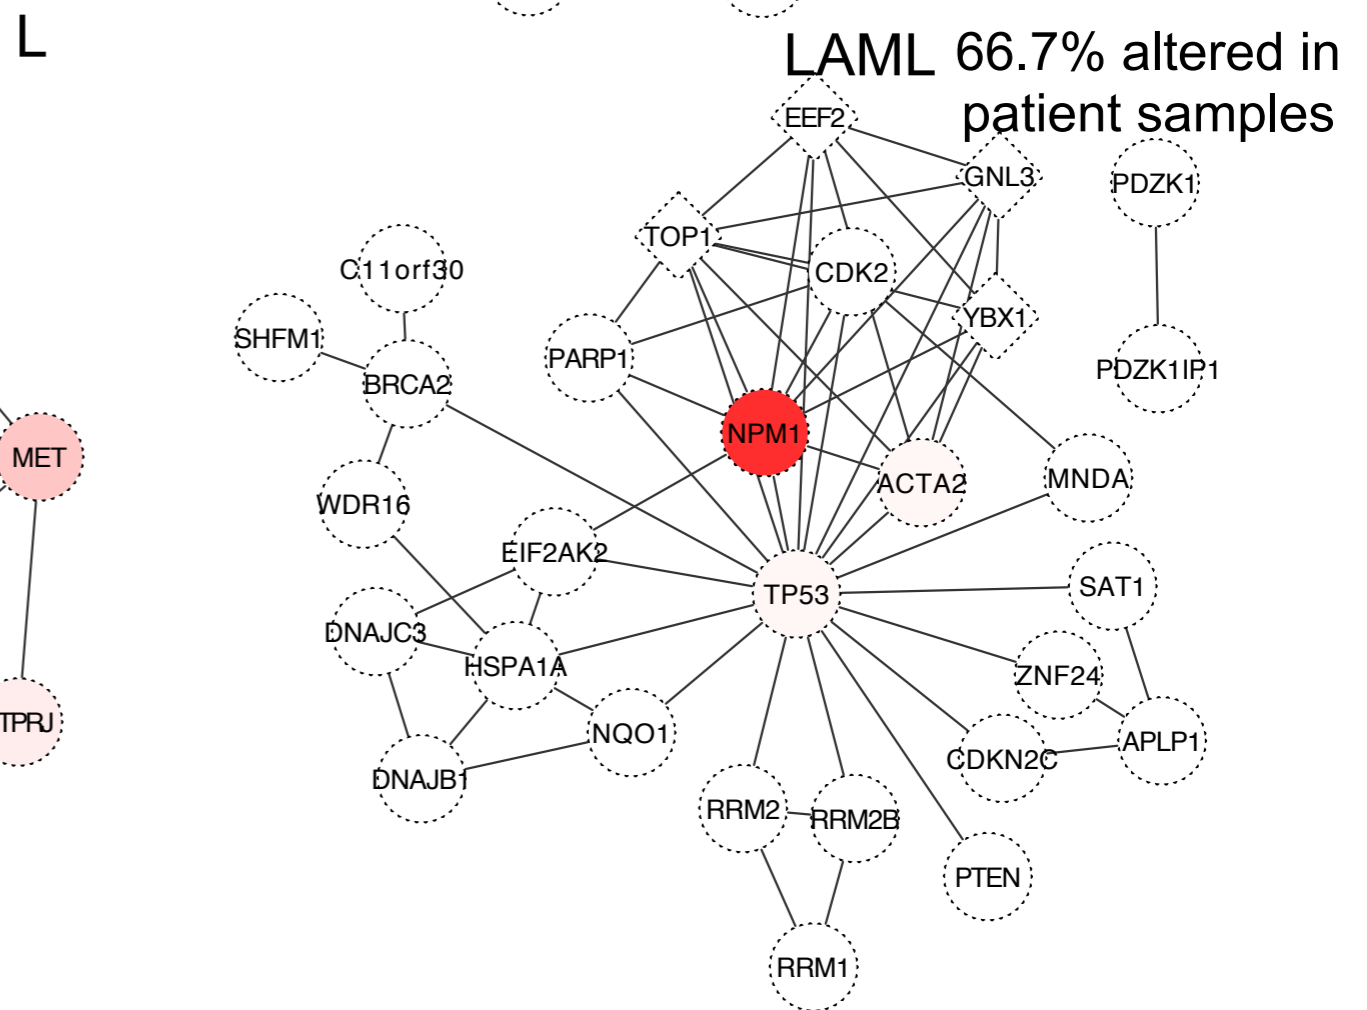

**M****LGG**

88% altered in patient samples

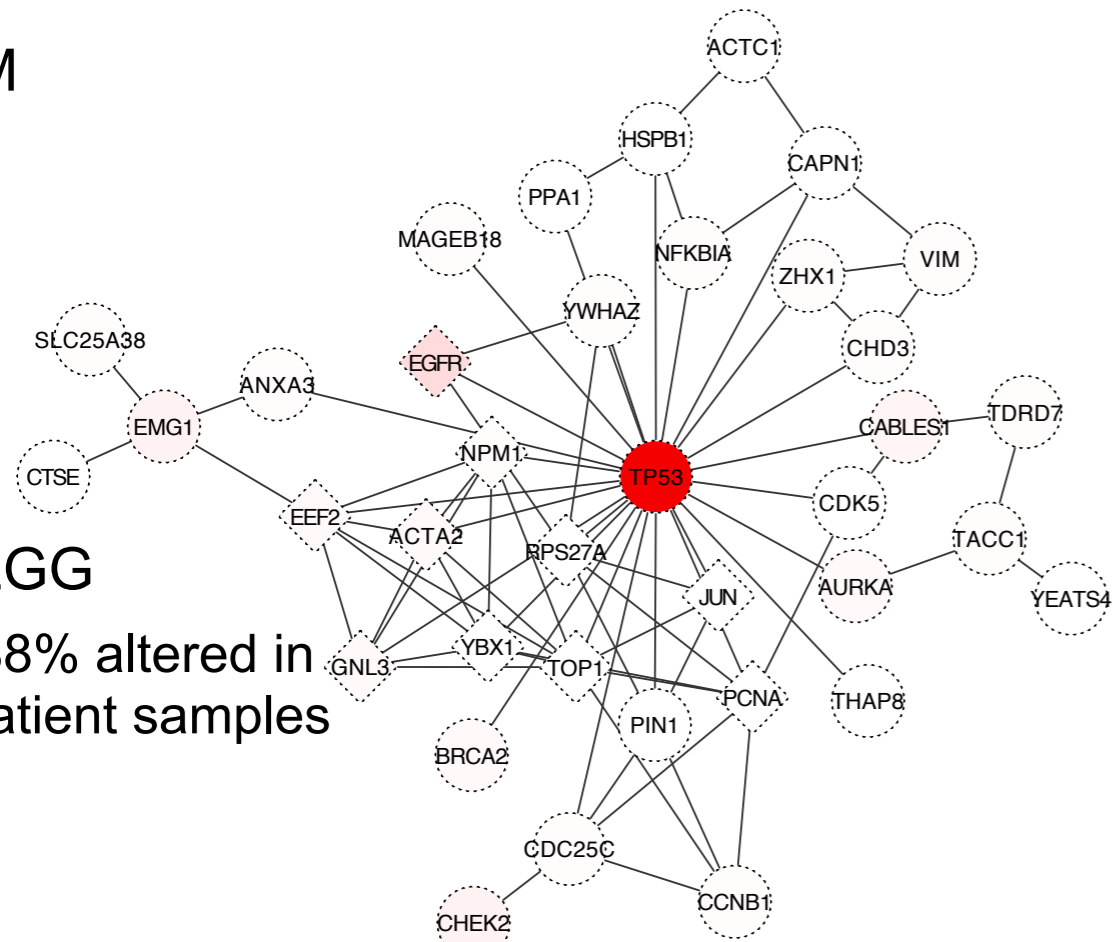**N****LUAD**

70.8% altered in patient samples

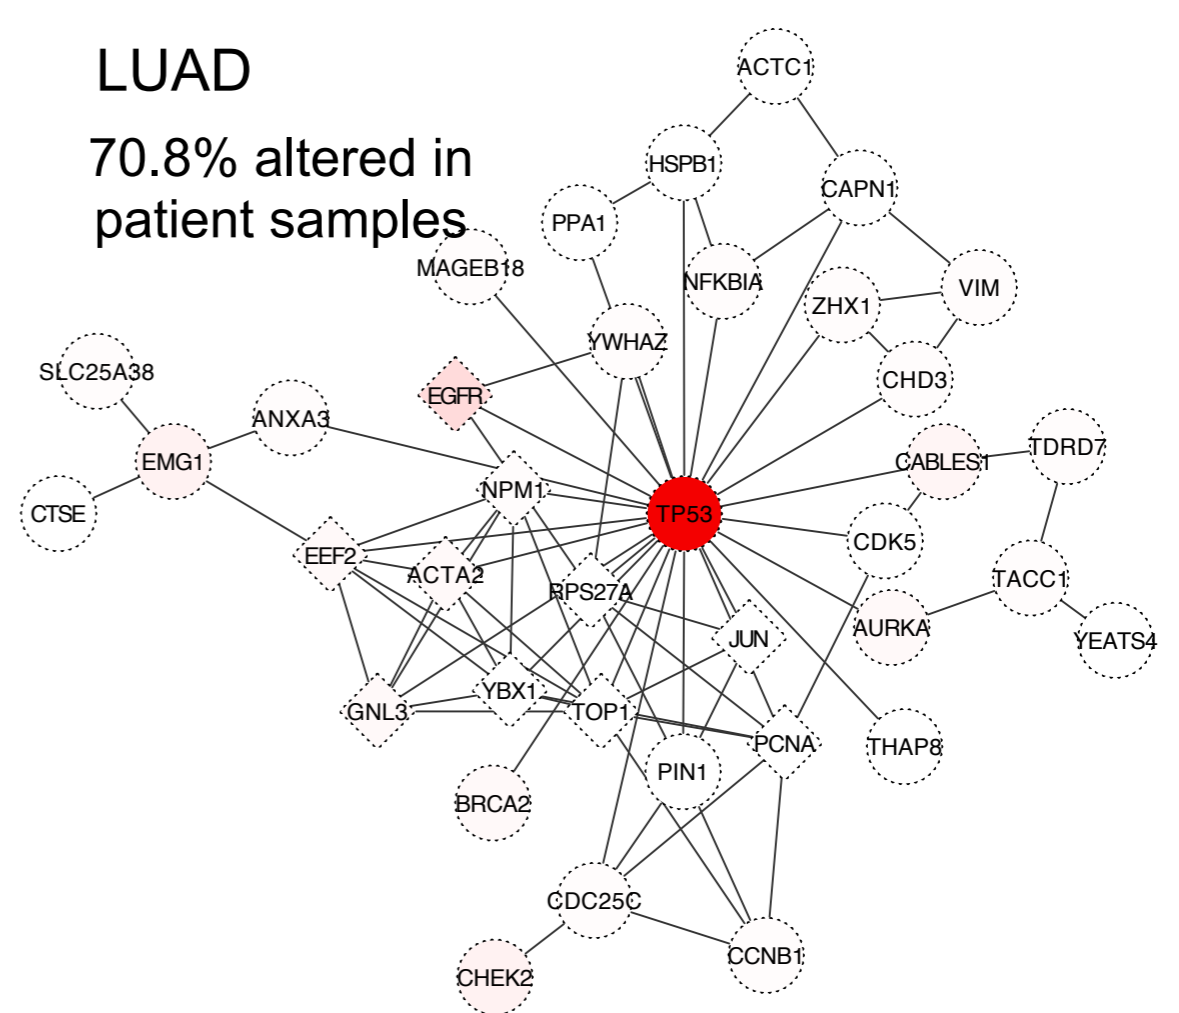**O****OV**

80.3% altered in patient samples

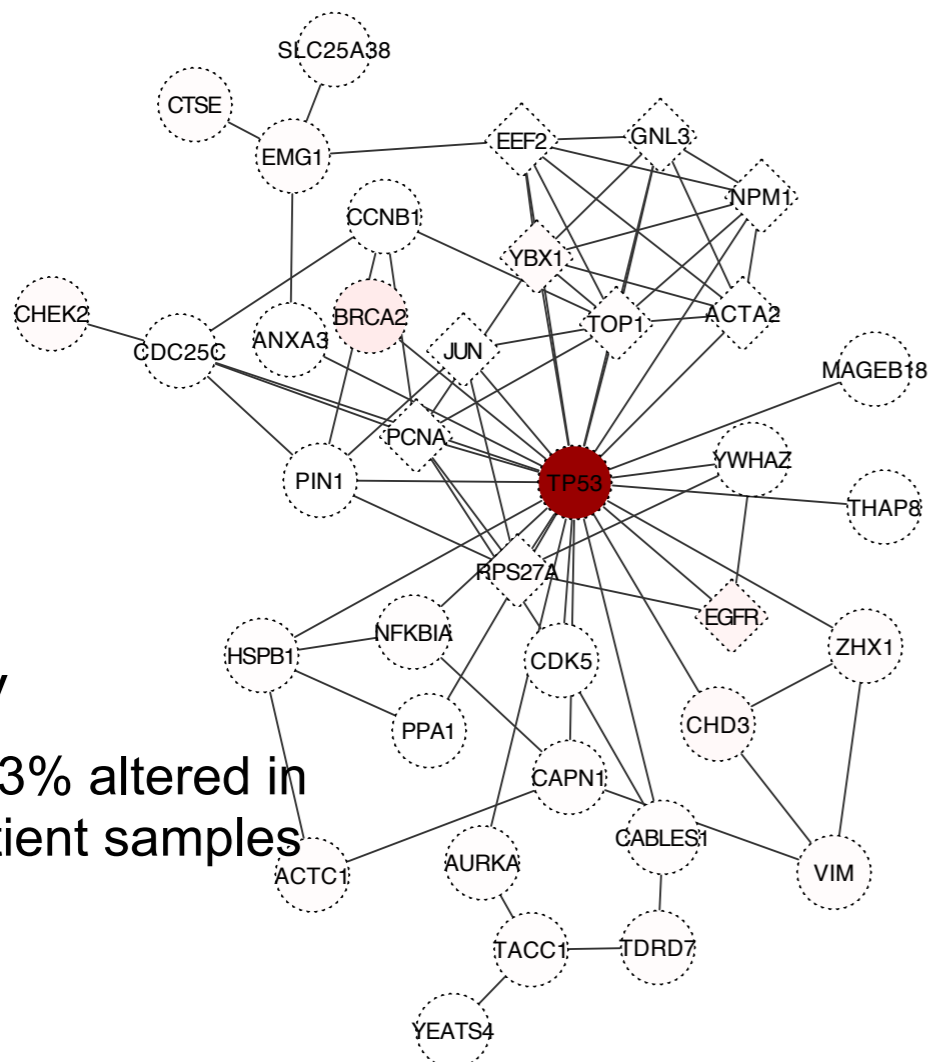**P****PRAD**

48% altered in patient samples

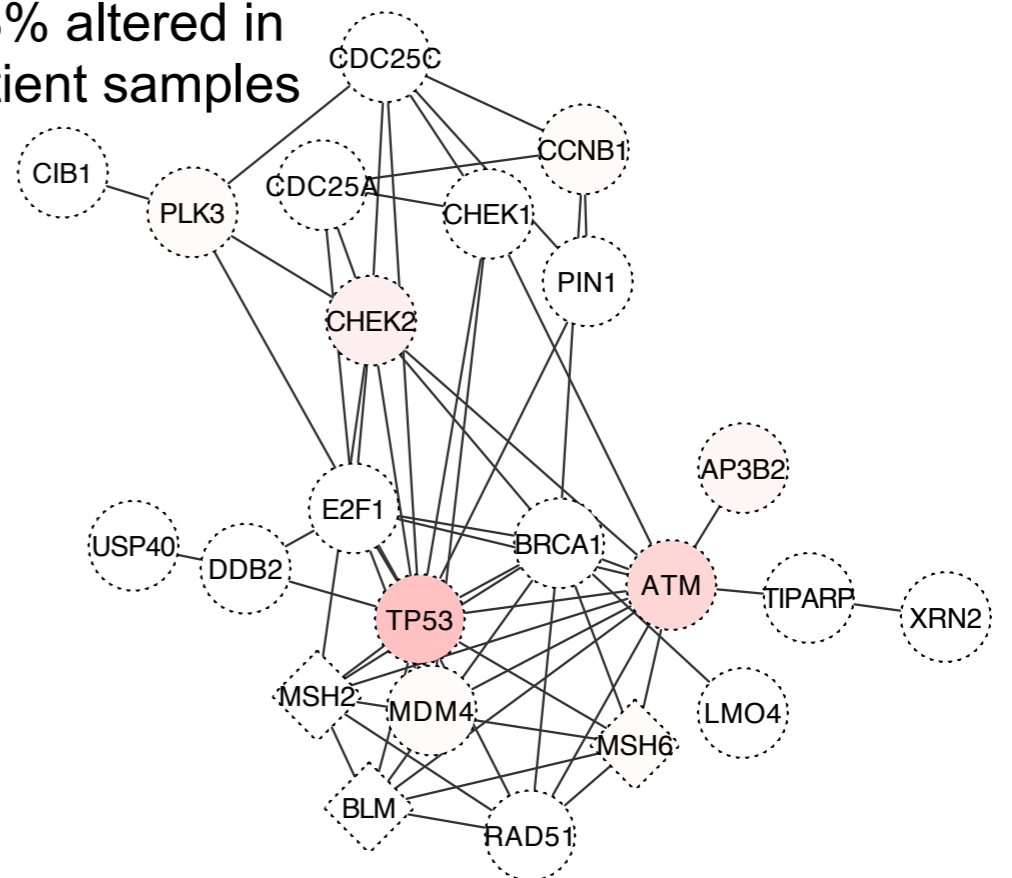

**Q**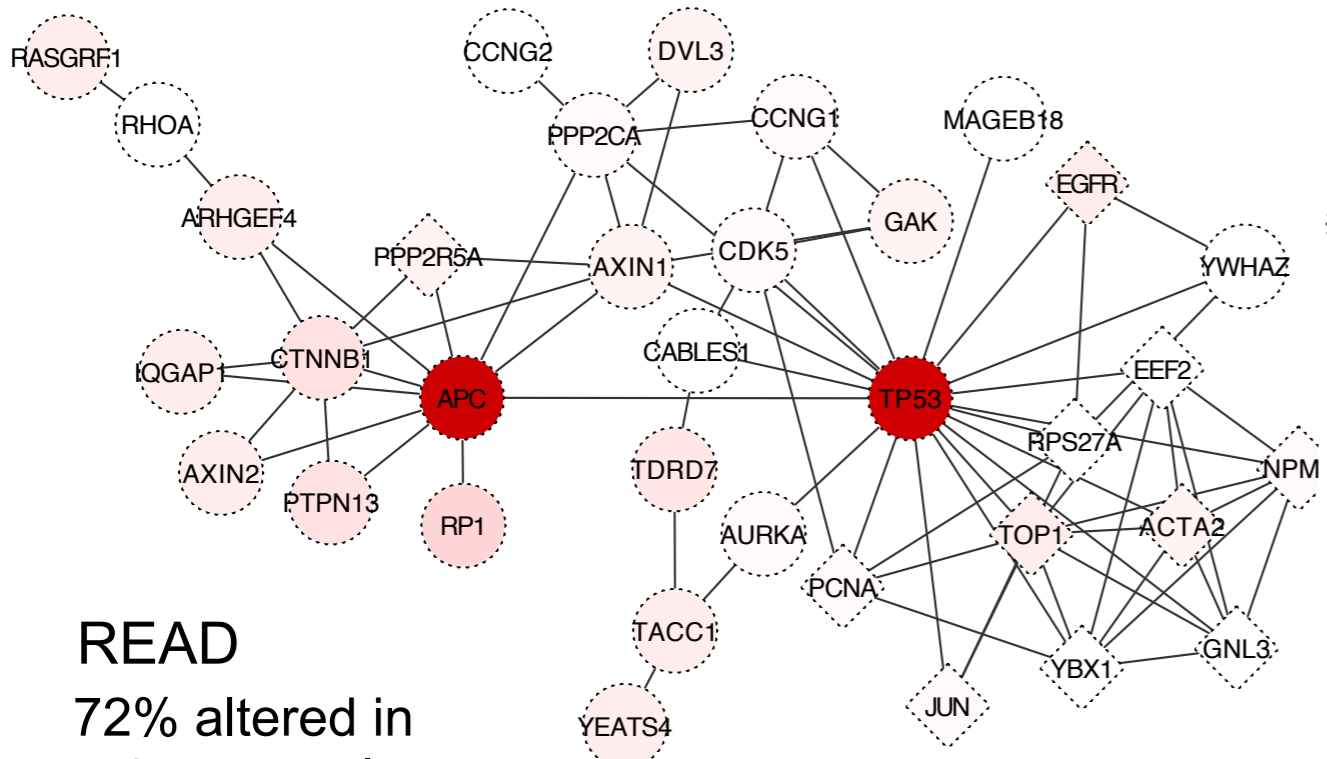

**READ**  
72% altered in patient samples

**R**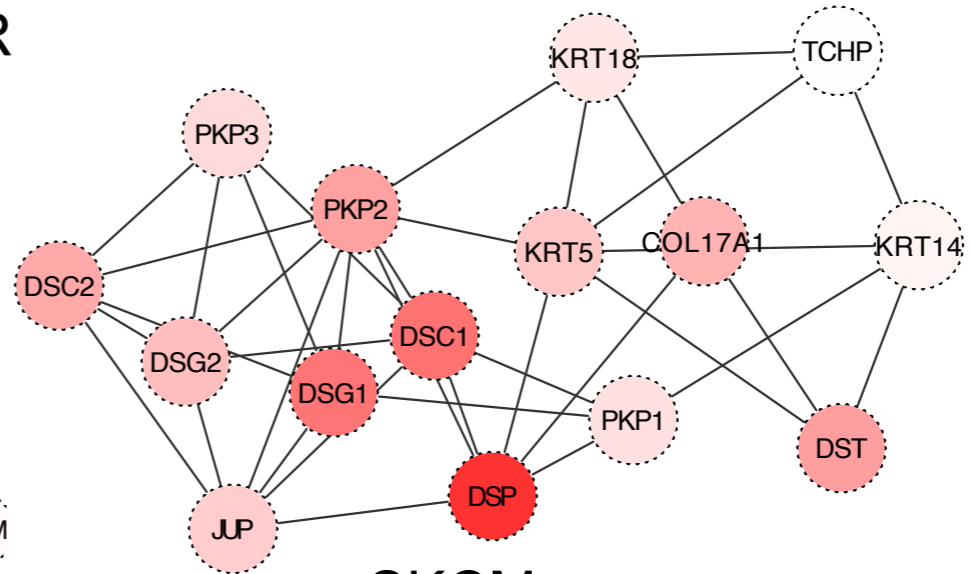

**SKCM**  
86.2% altered in patient samples

**S**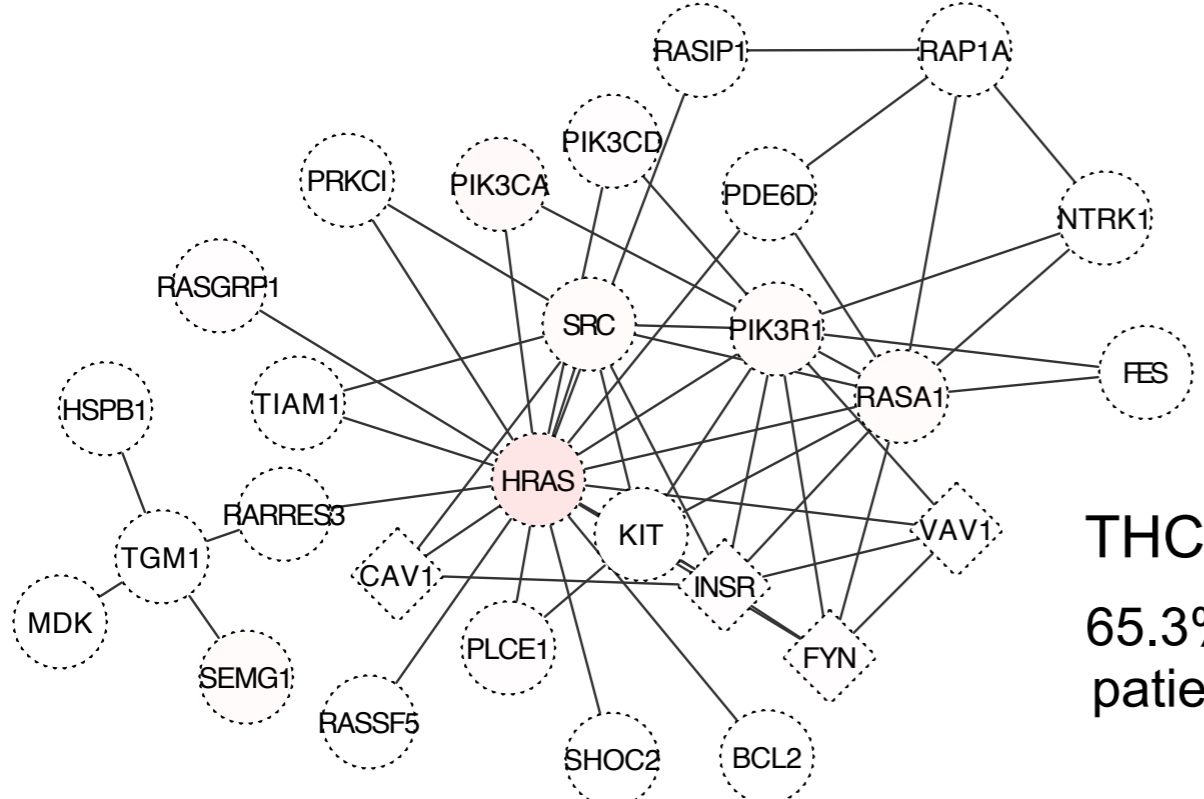

**THCA**  
65.3% altered in patient samples

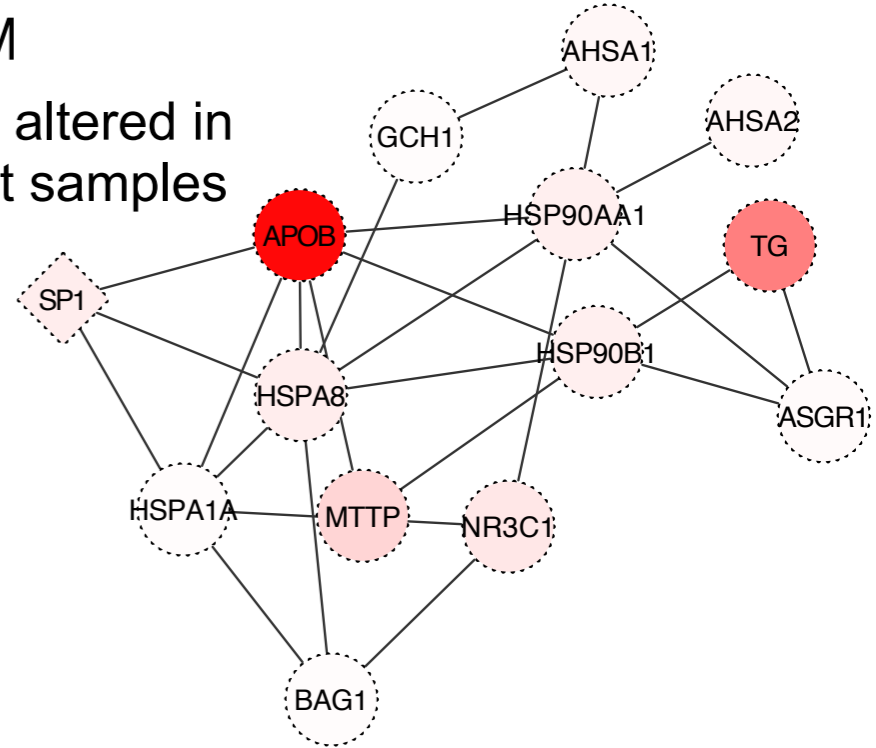

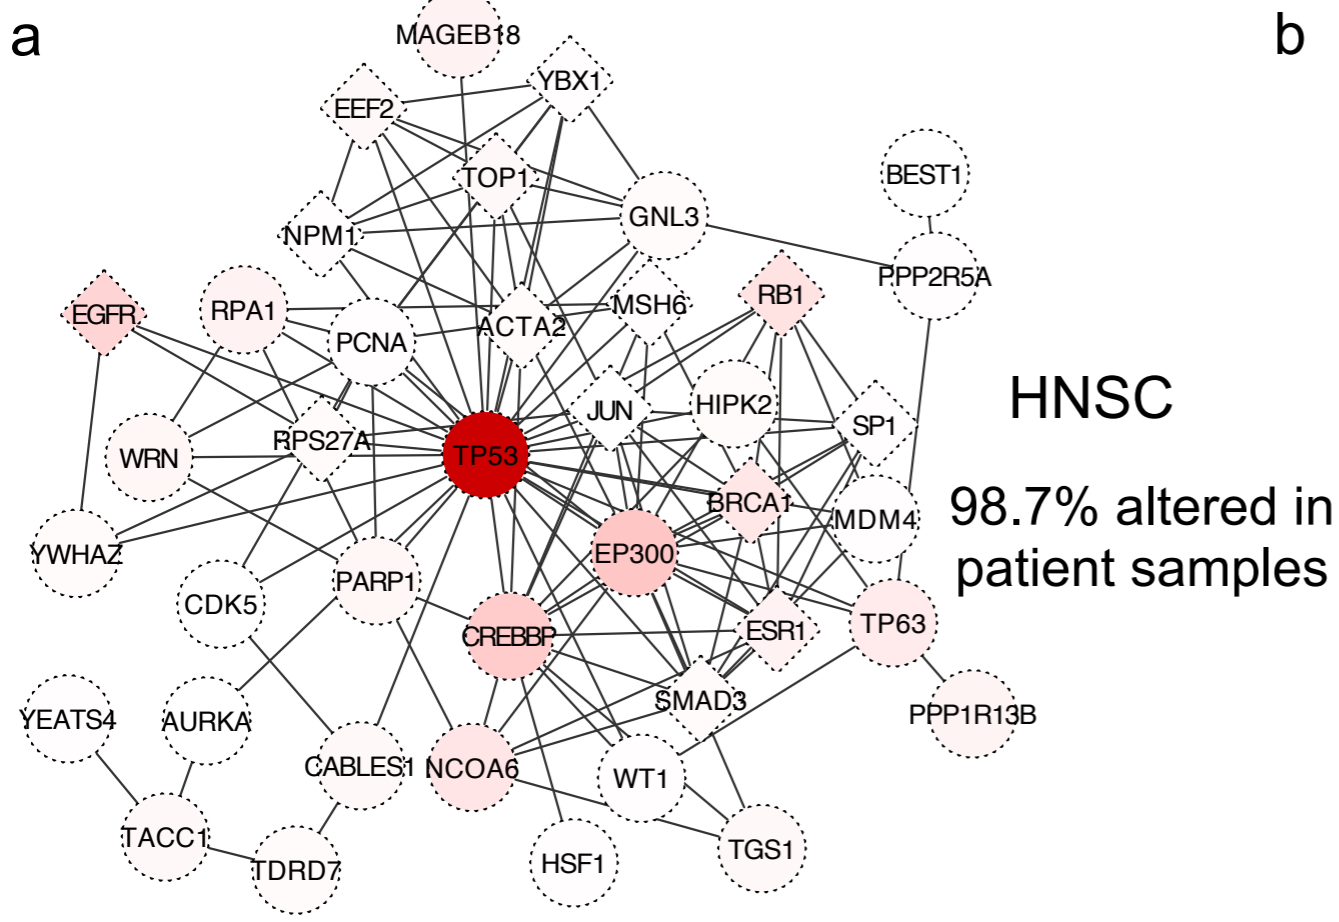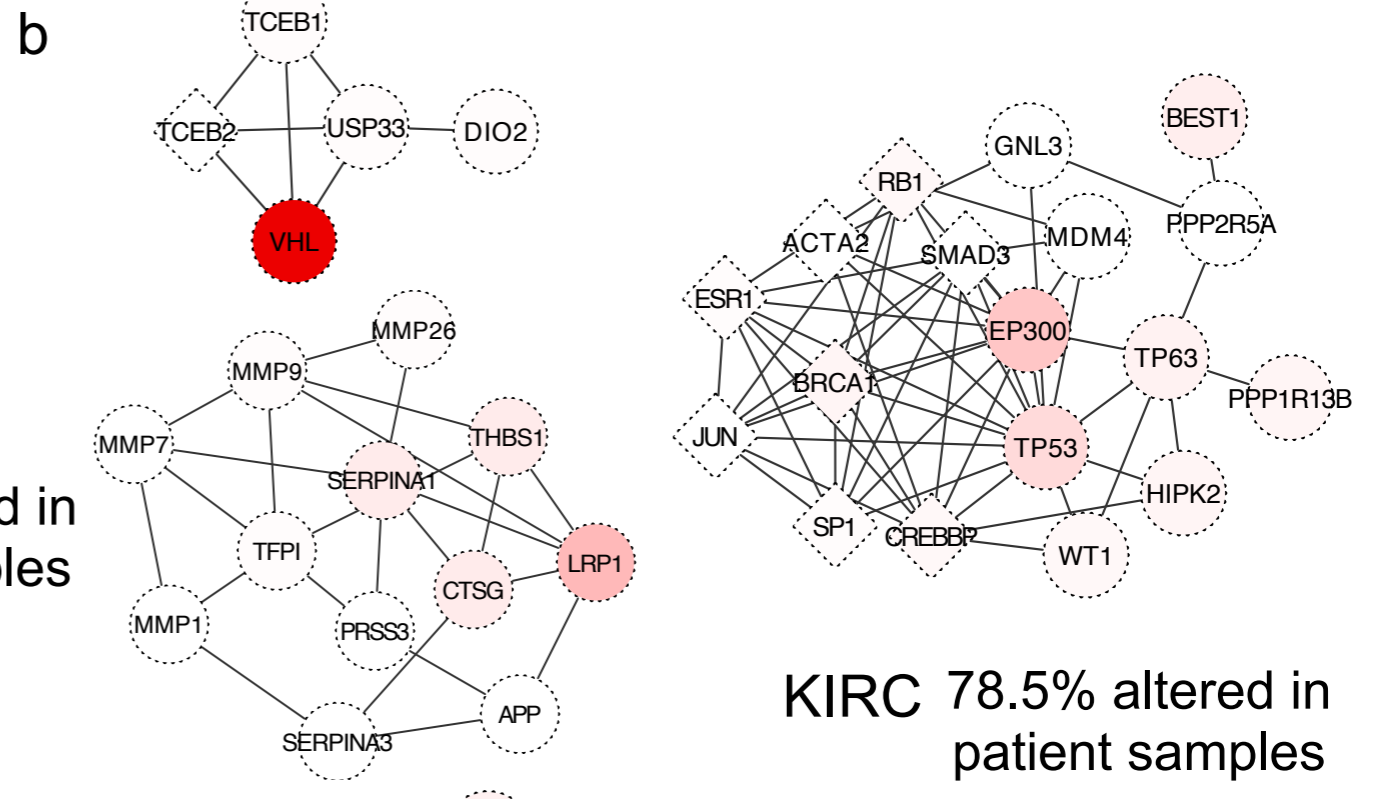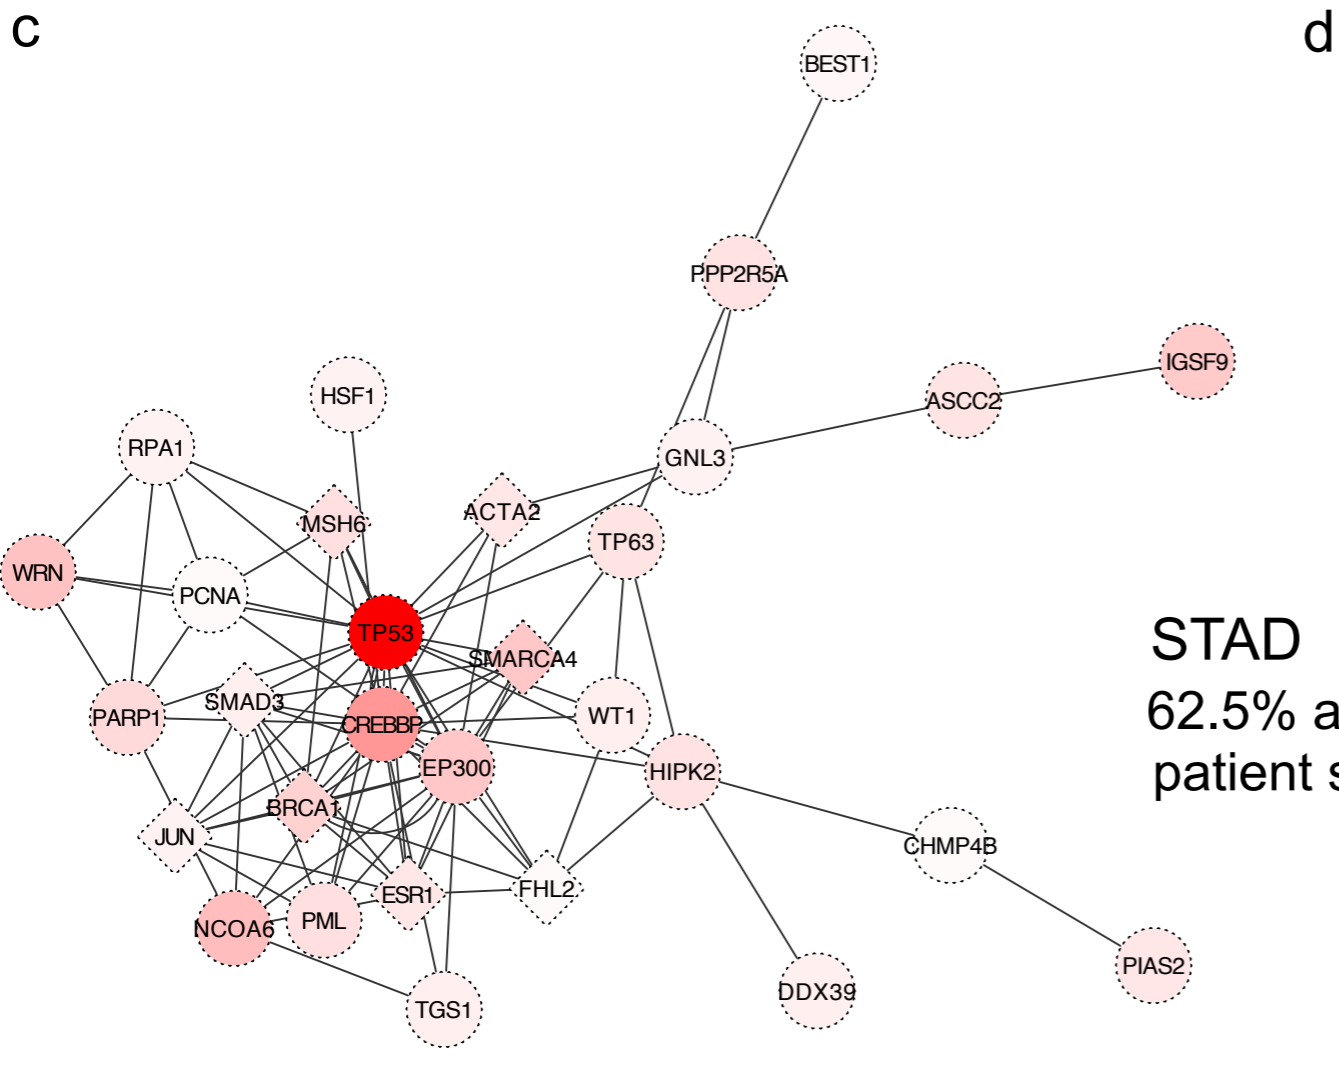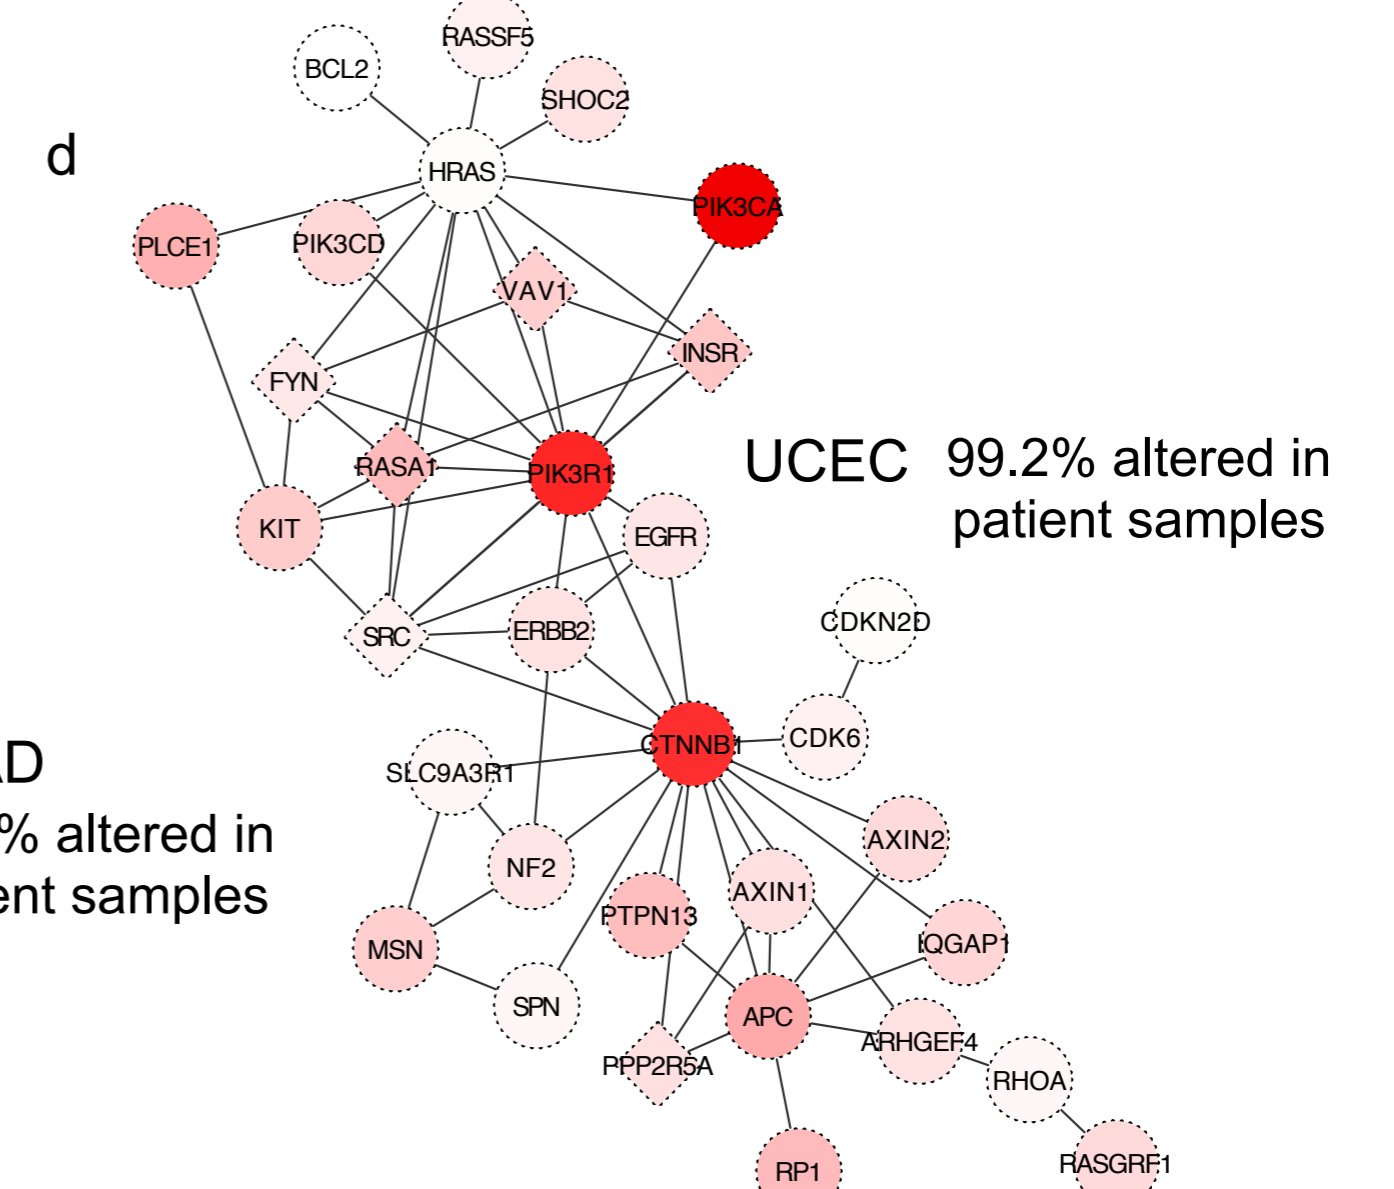

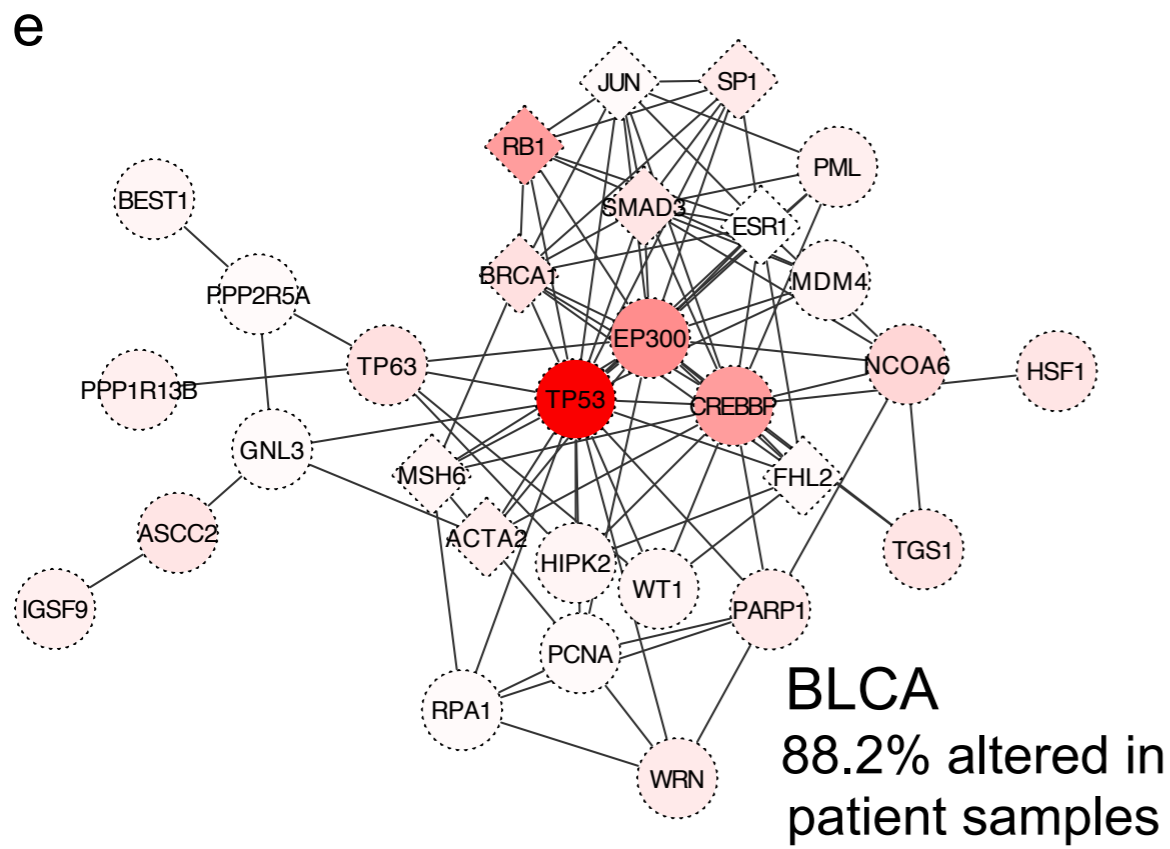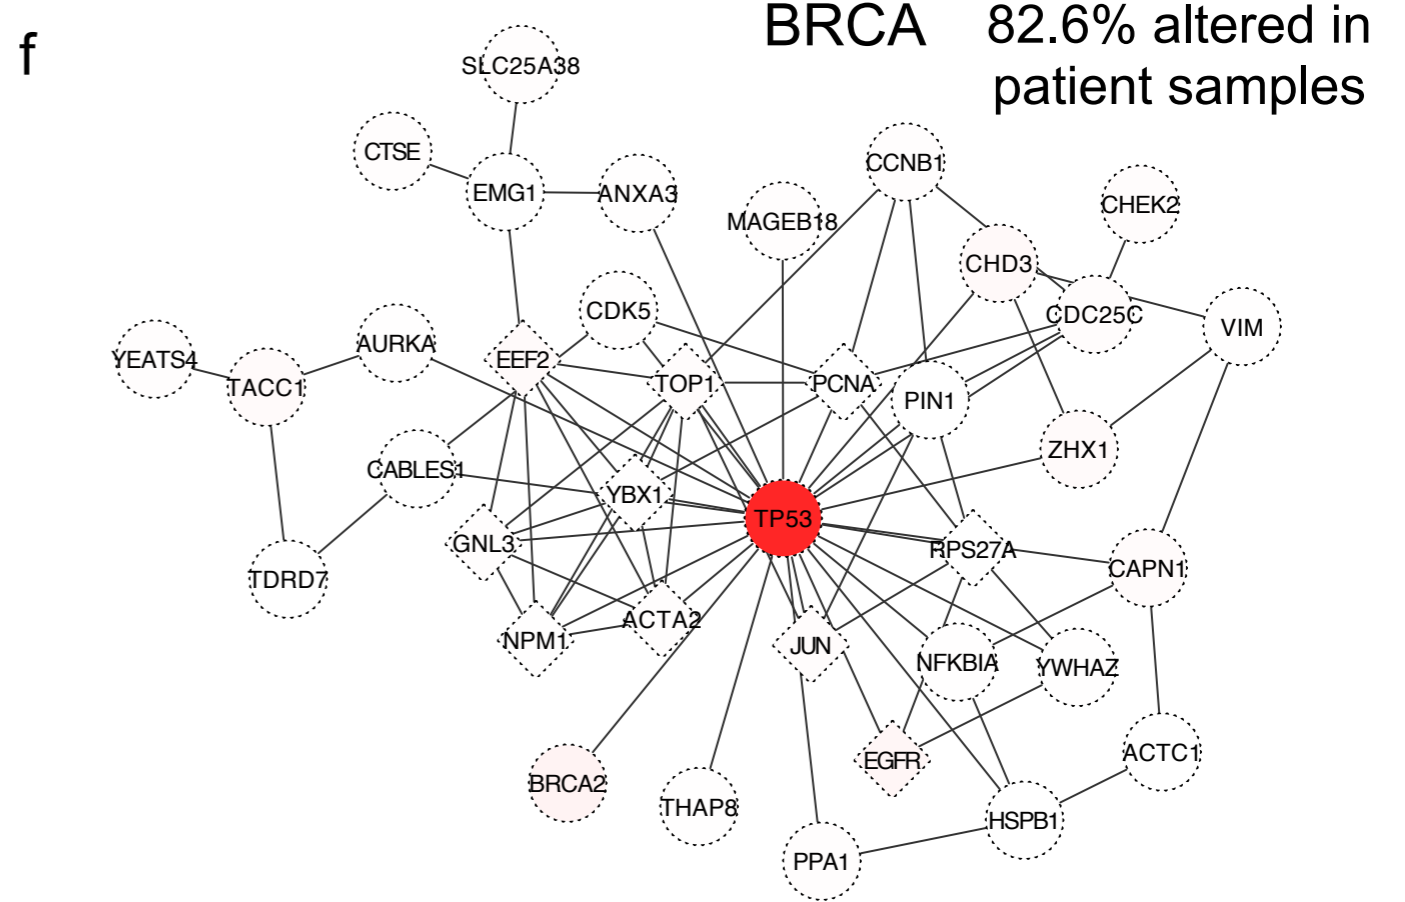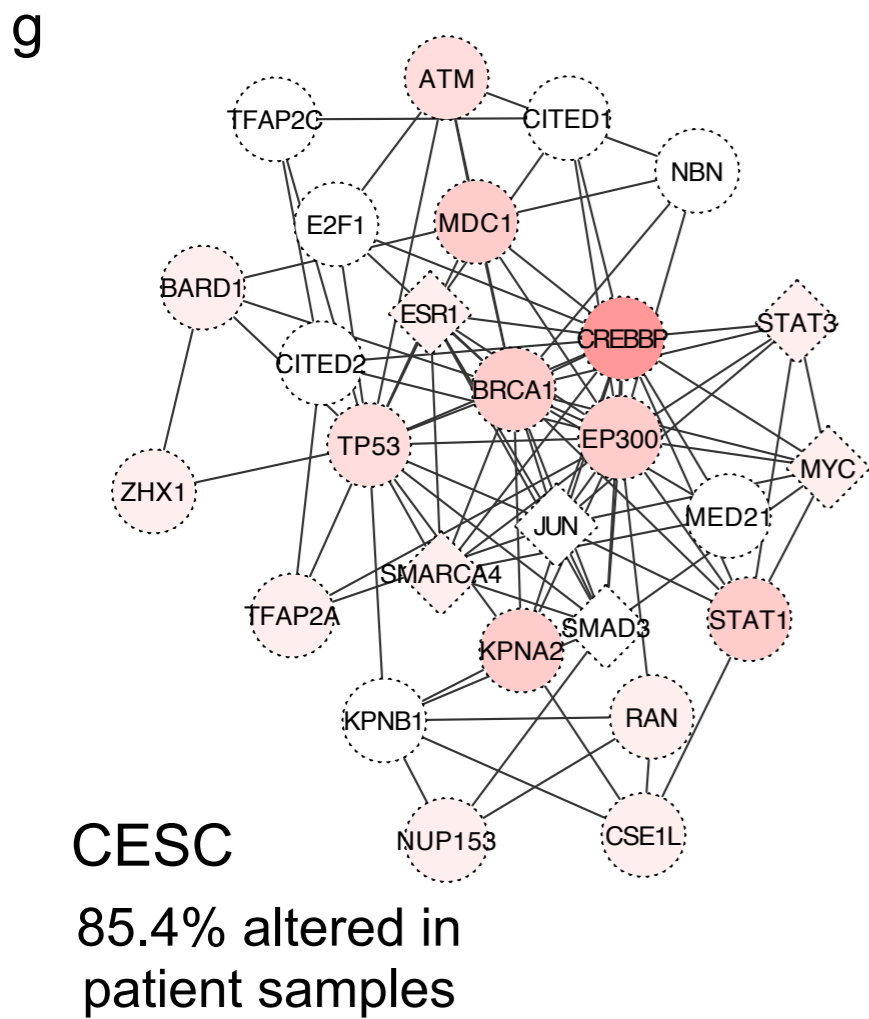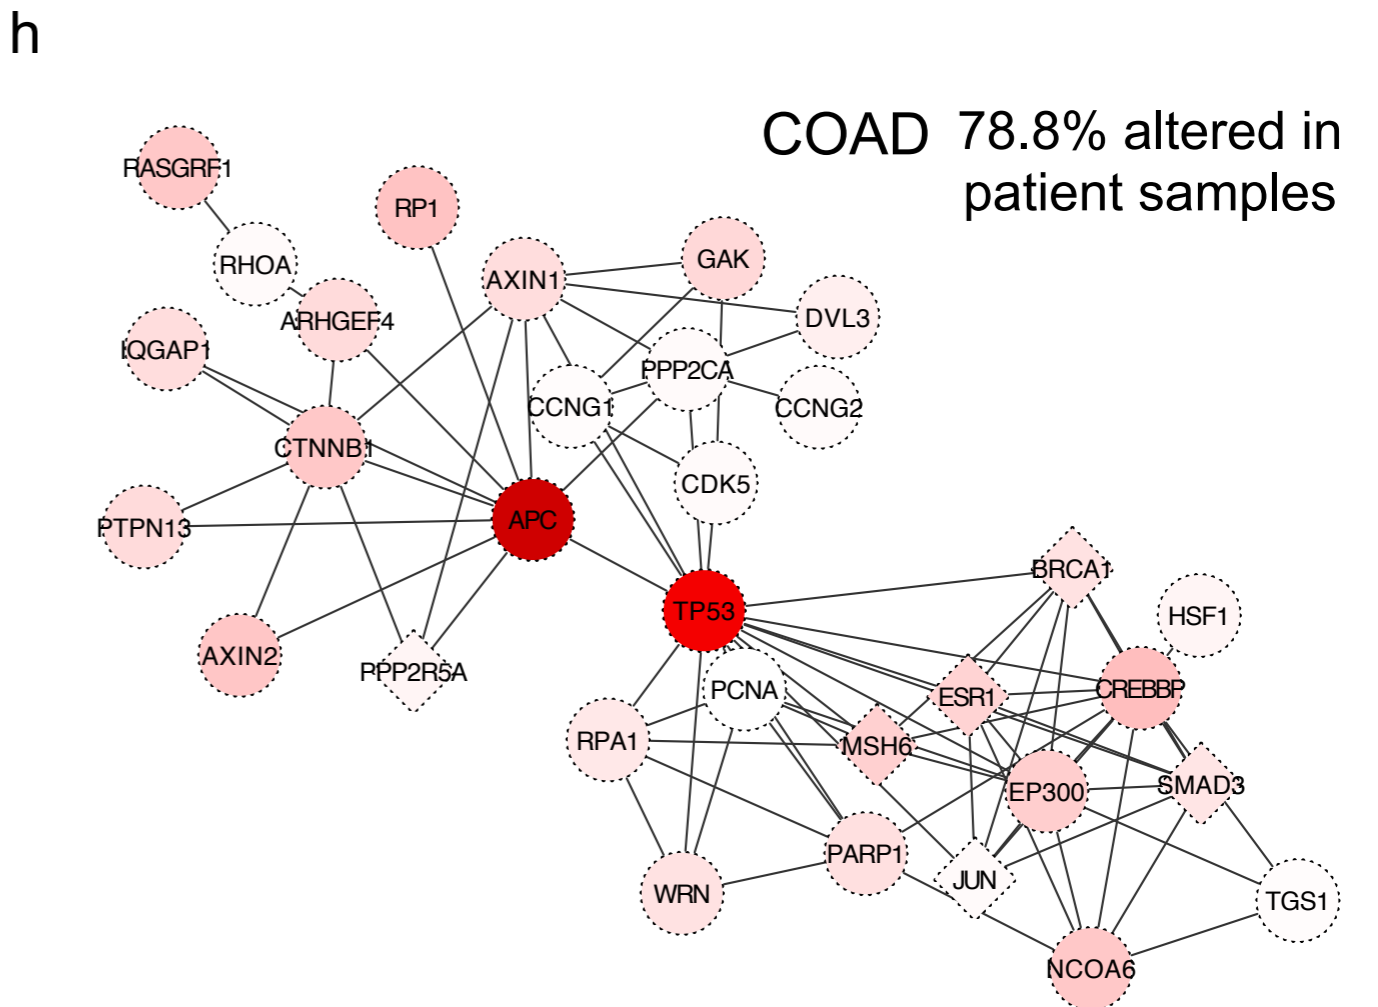



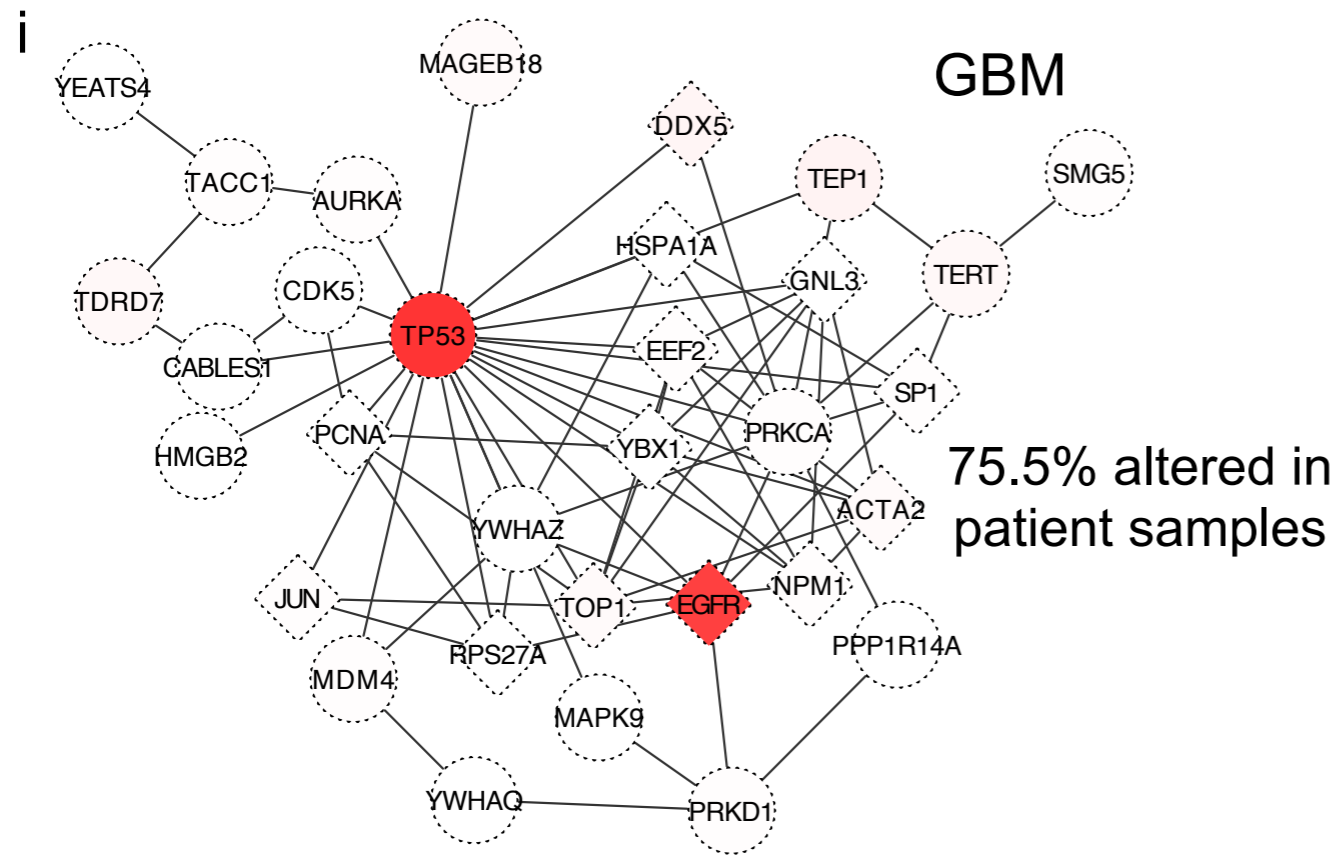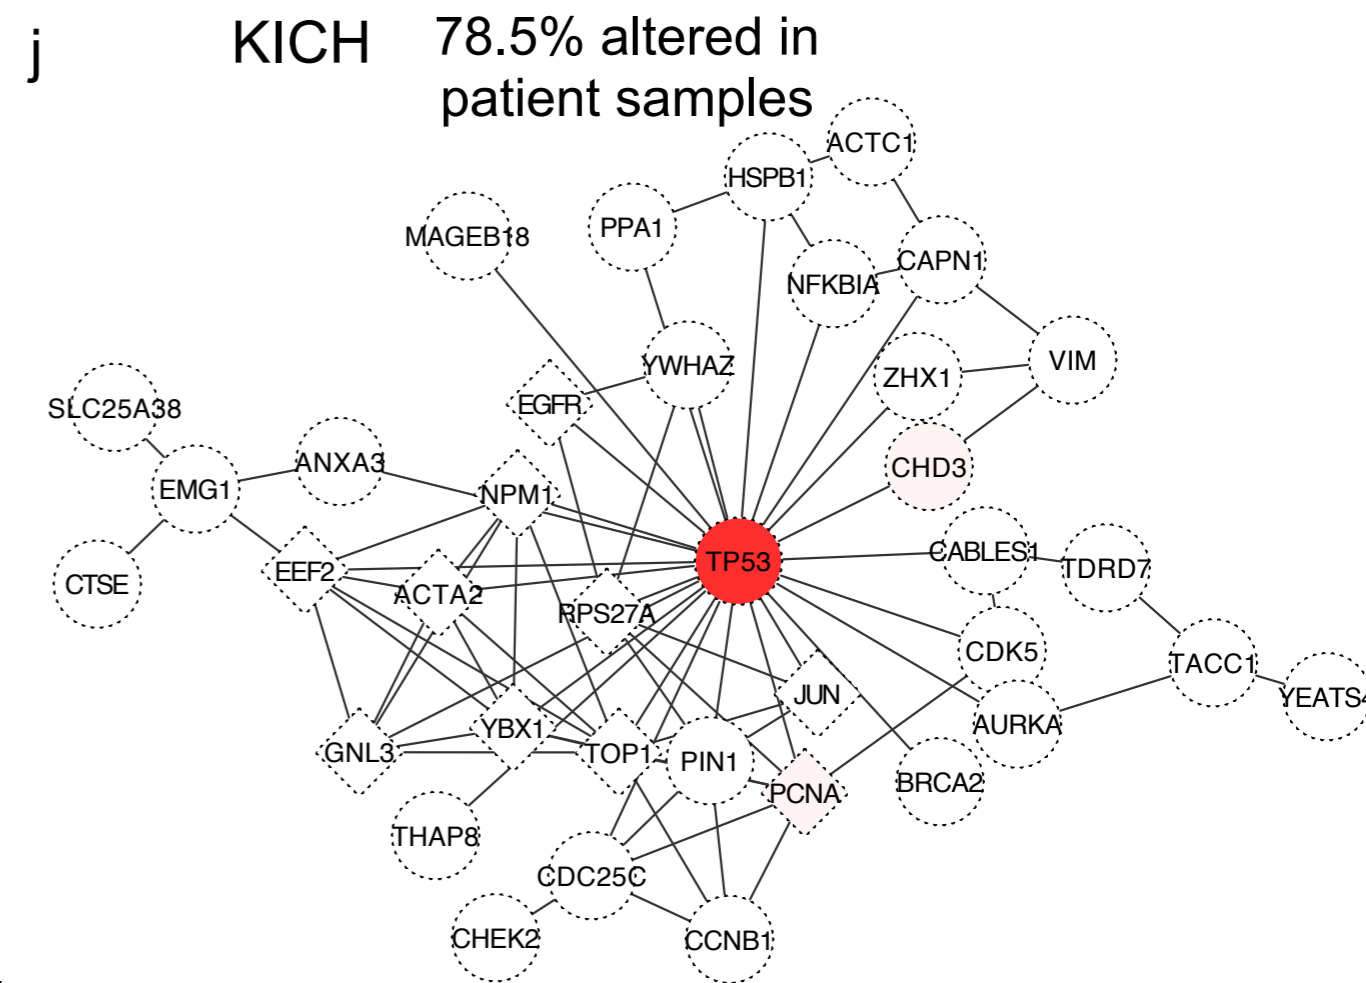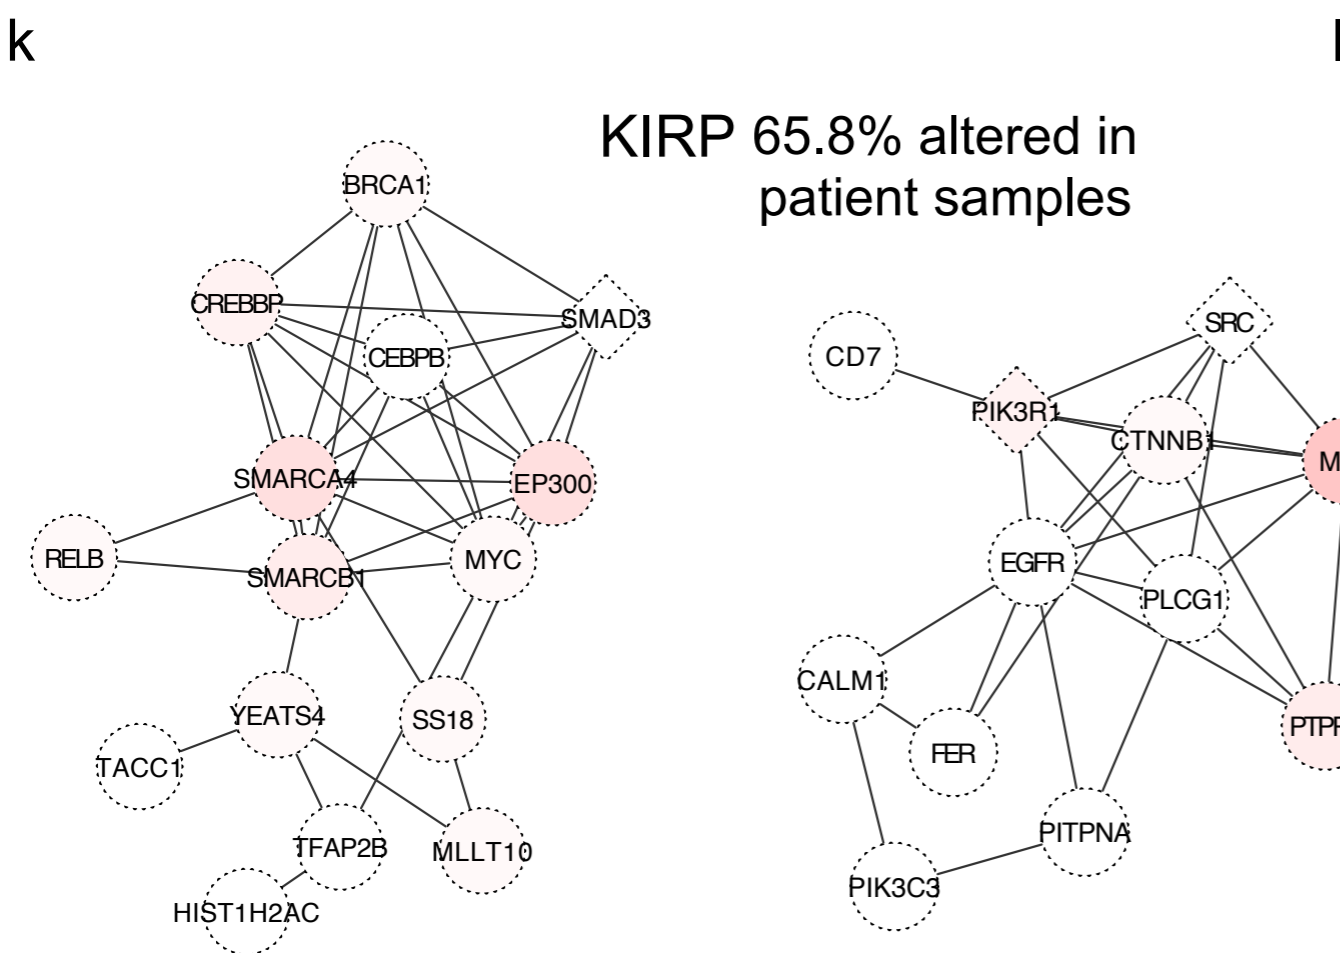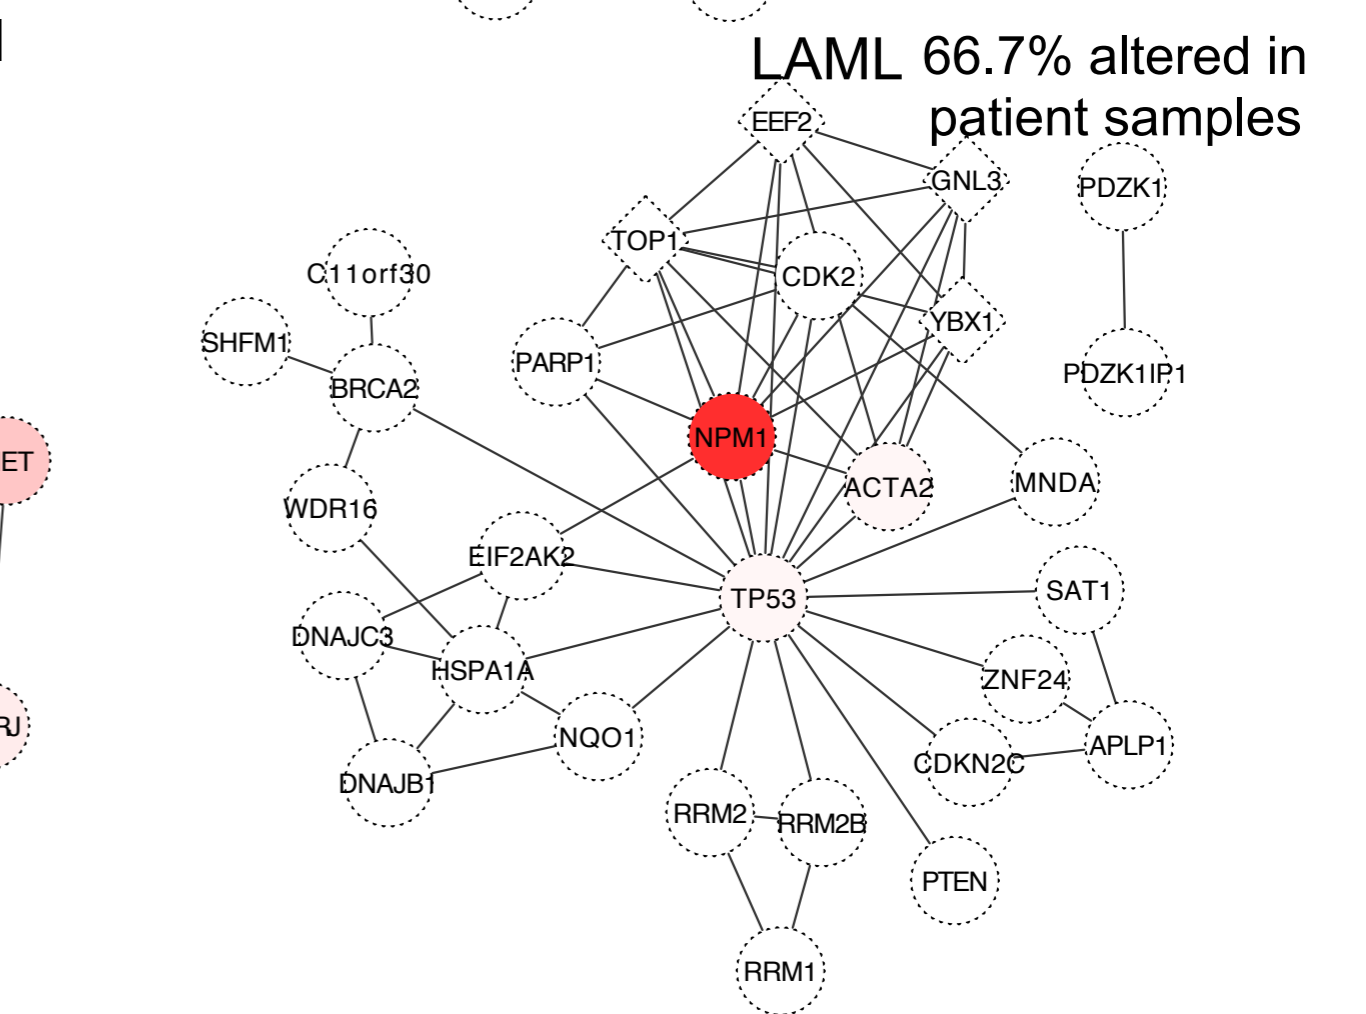

m

LGG

88% altered in patient samples

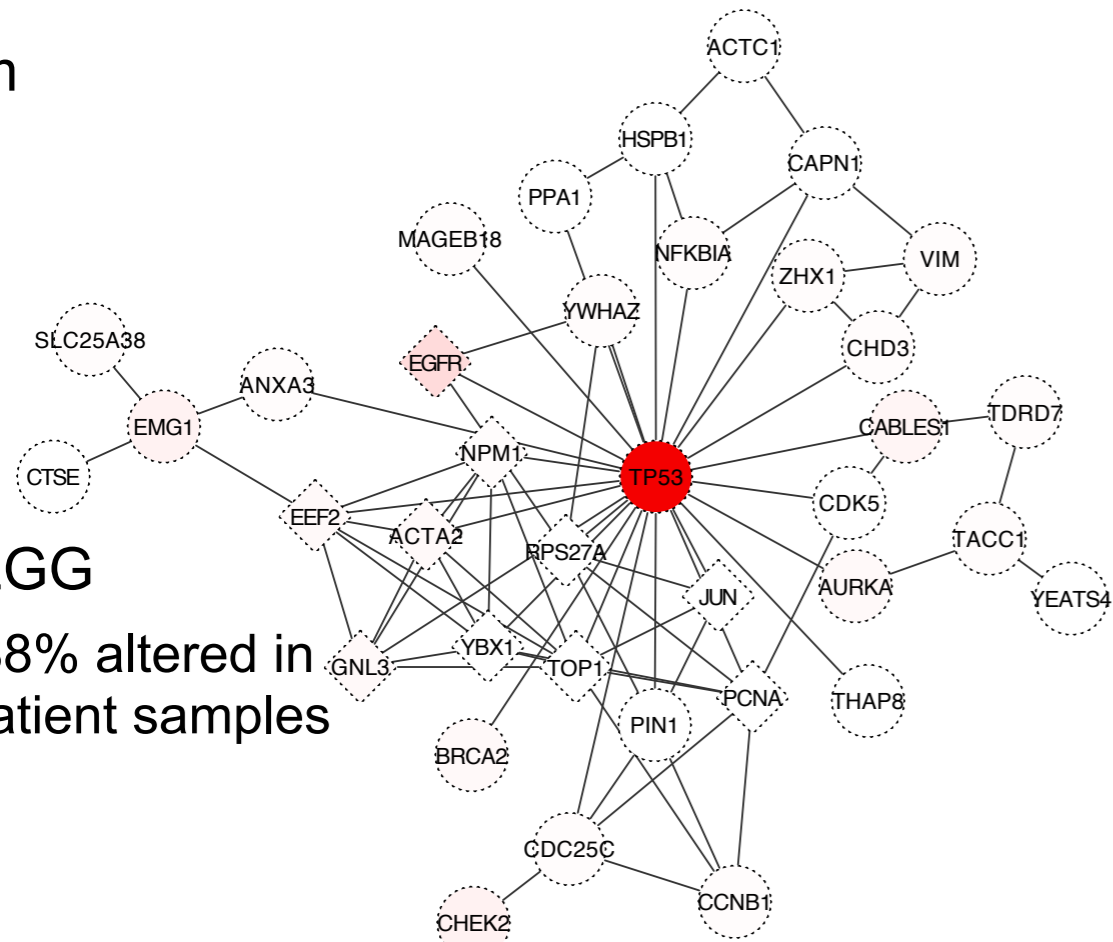

n

LUAD

70.8% altered in patient samples

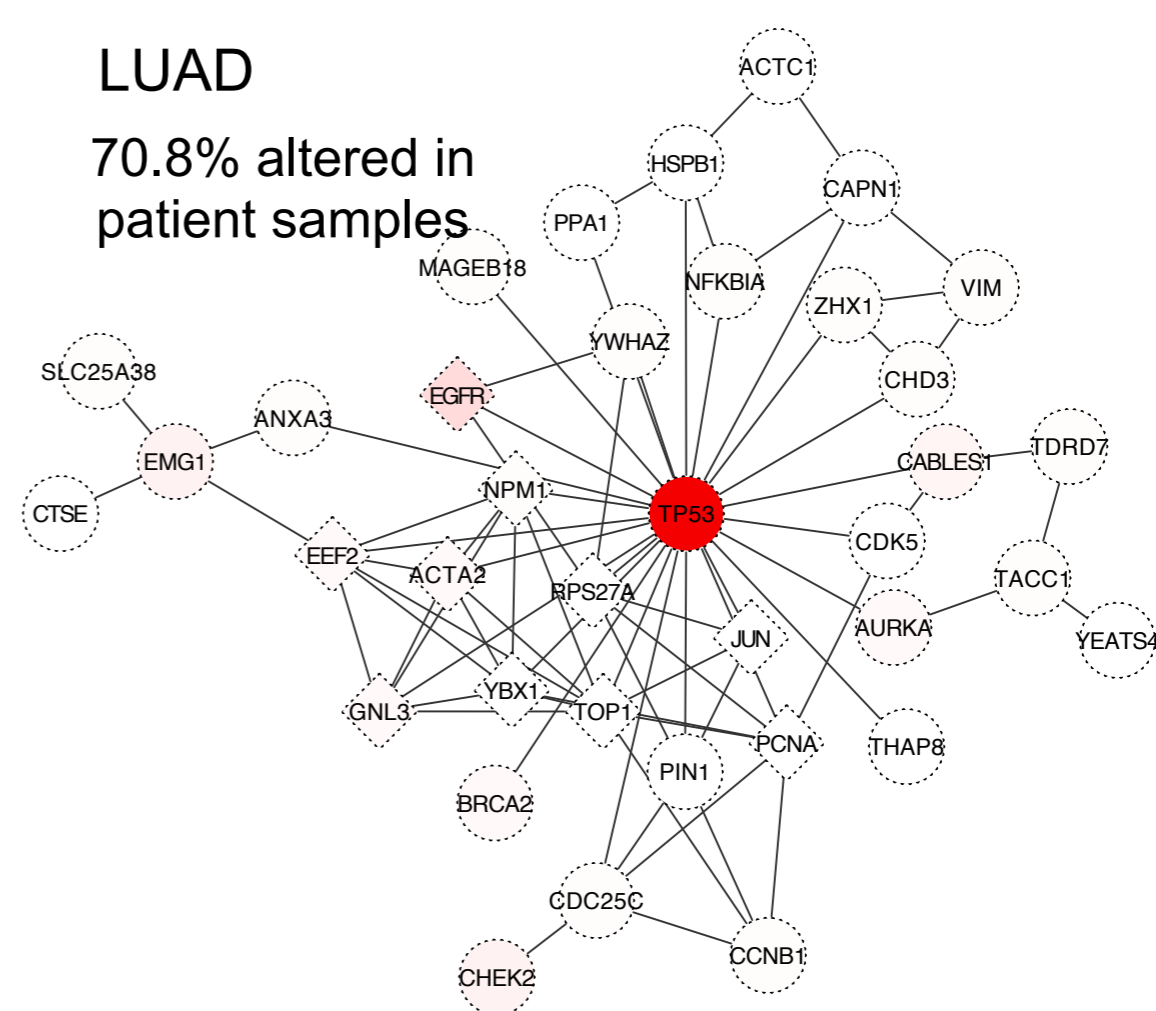

o

OV

80.3% altered in patient samples



p

PRAD

48% altered in patient samples

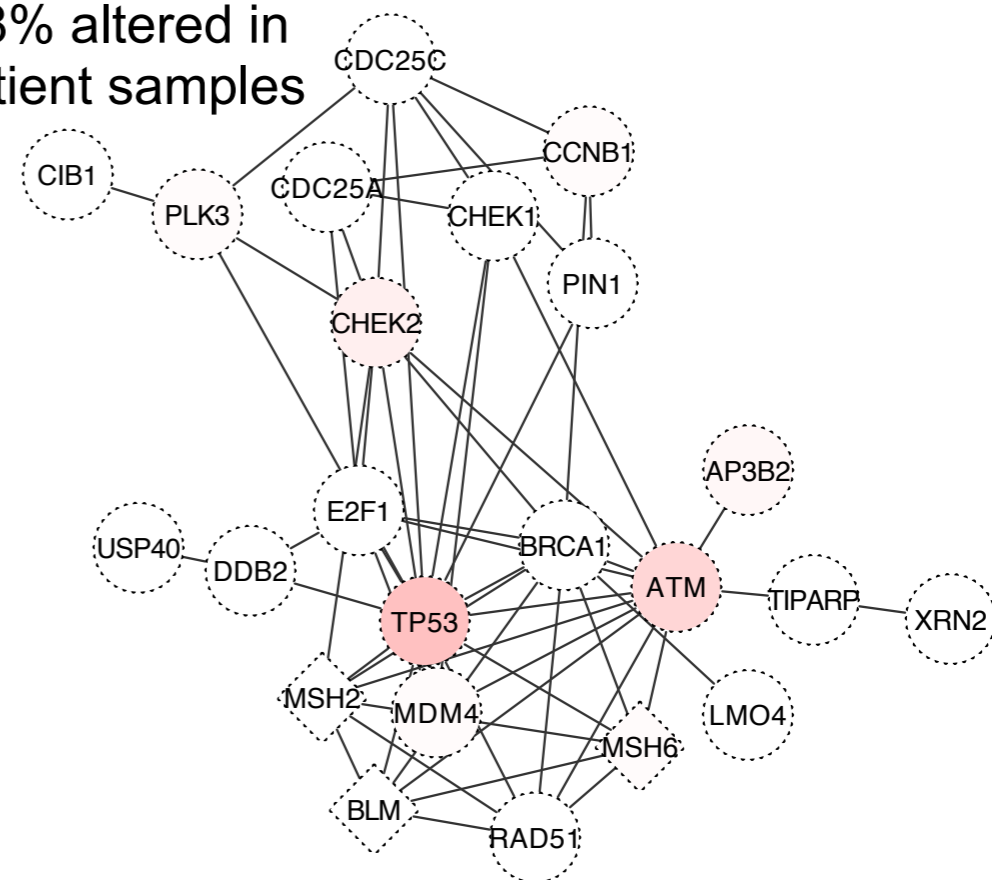

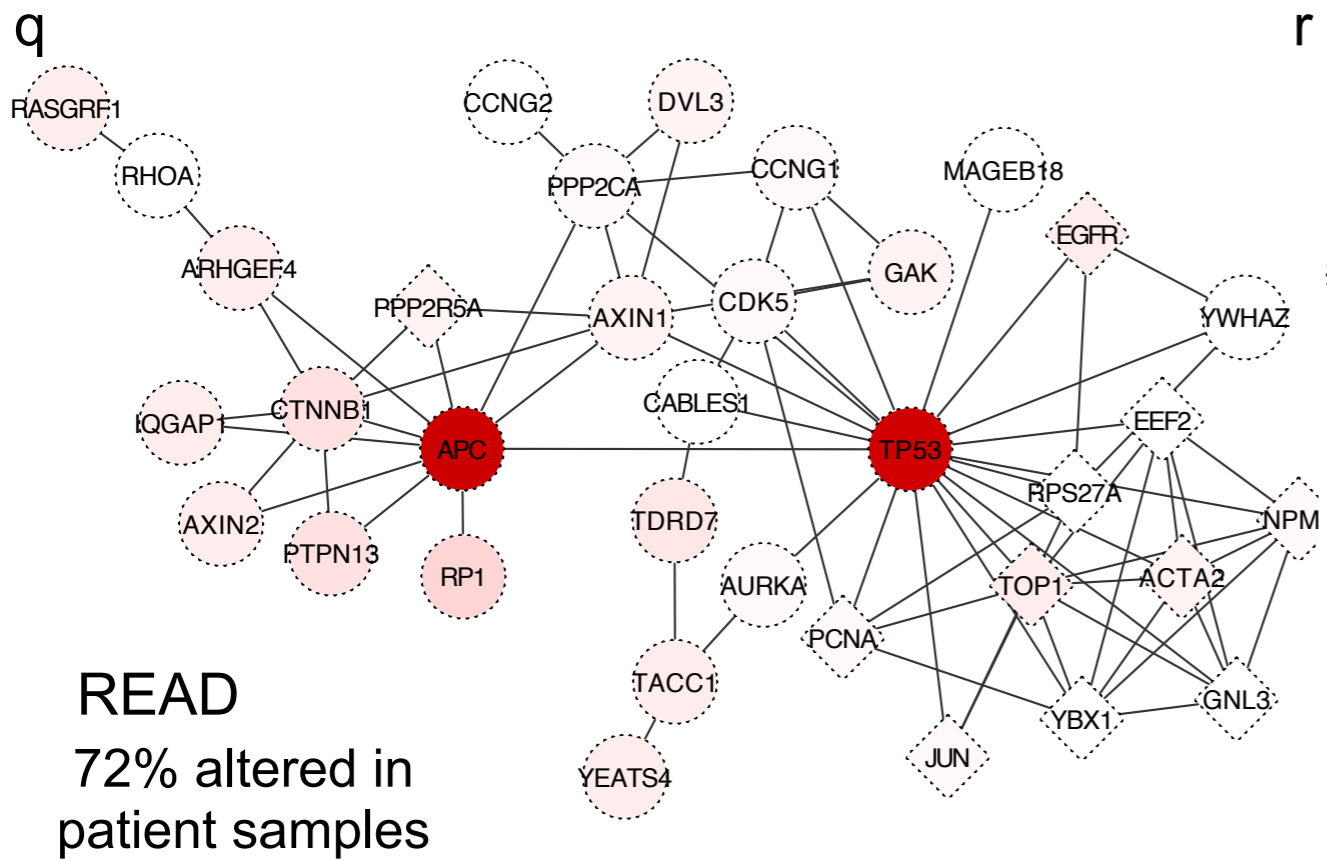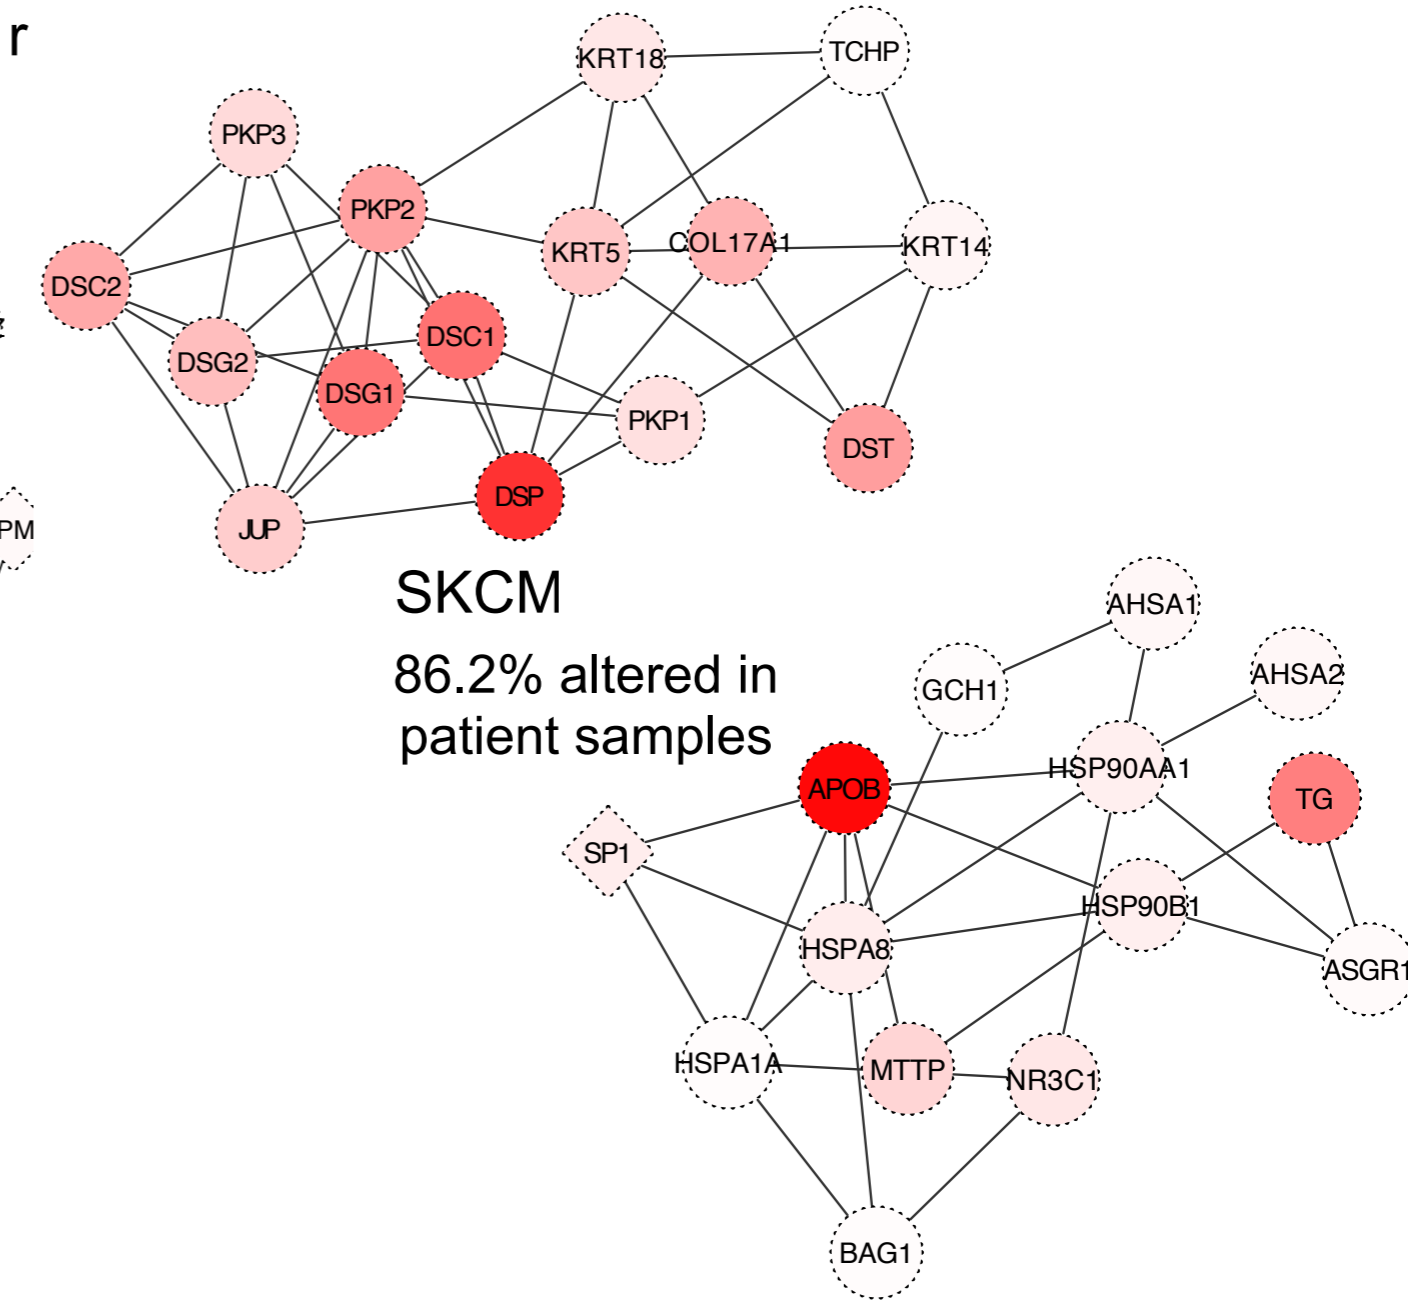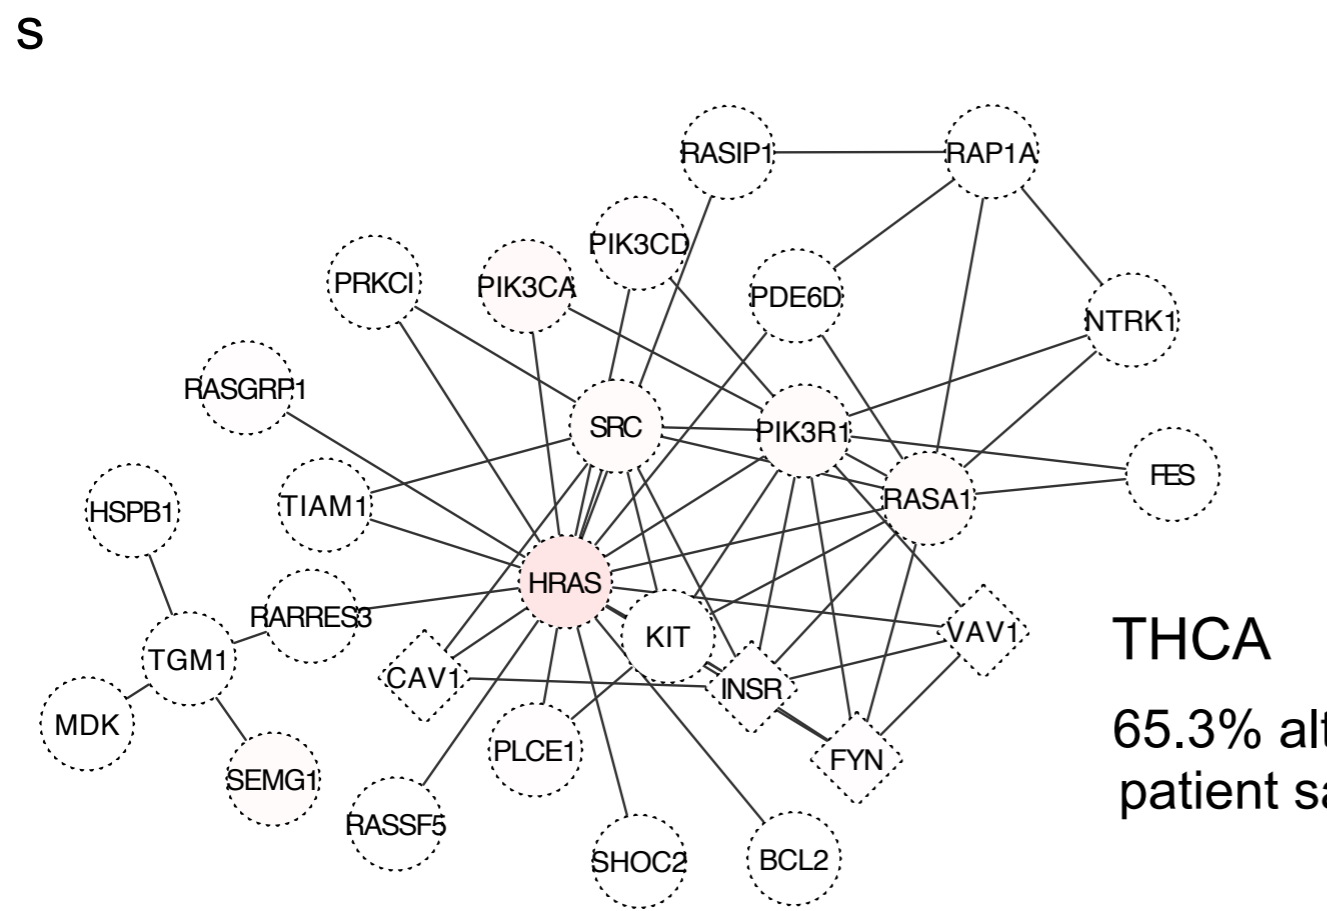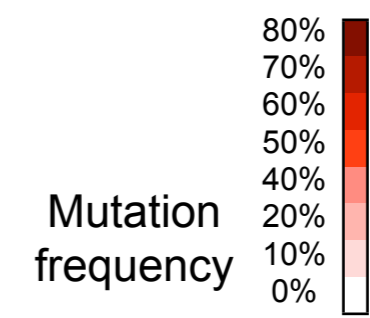

# Supplementary Figure 2

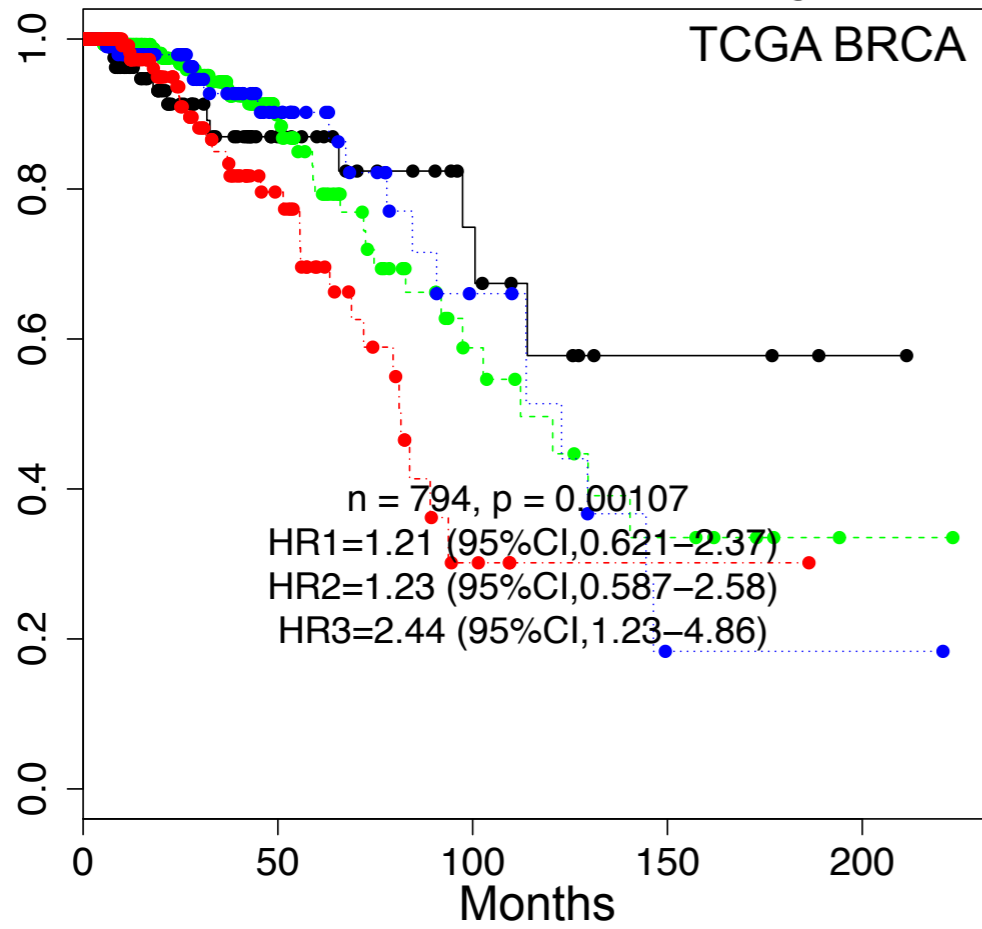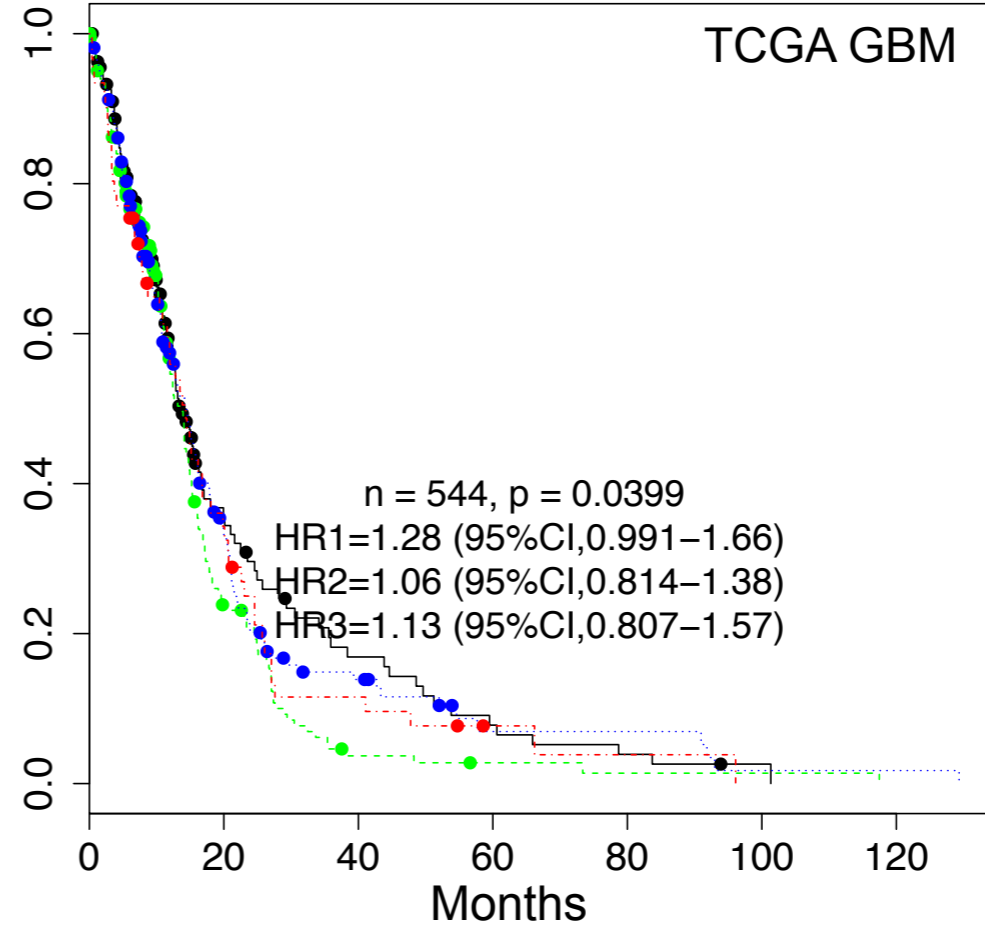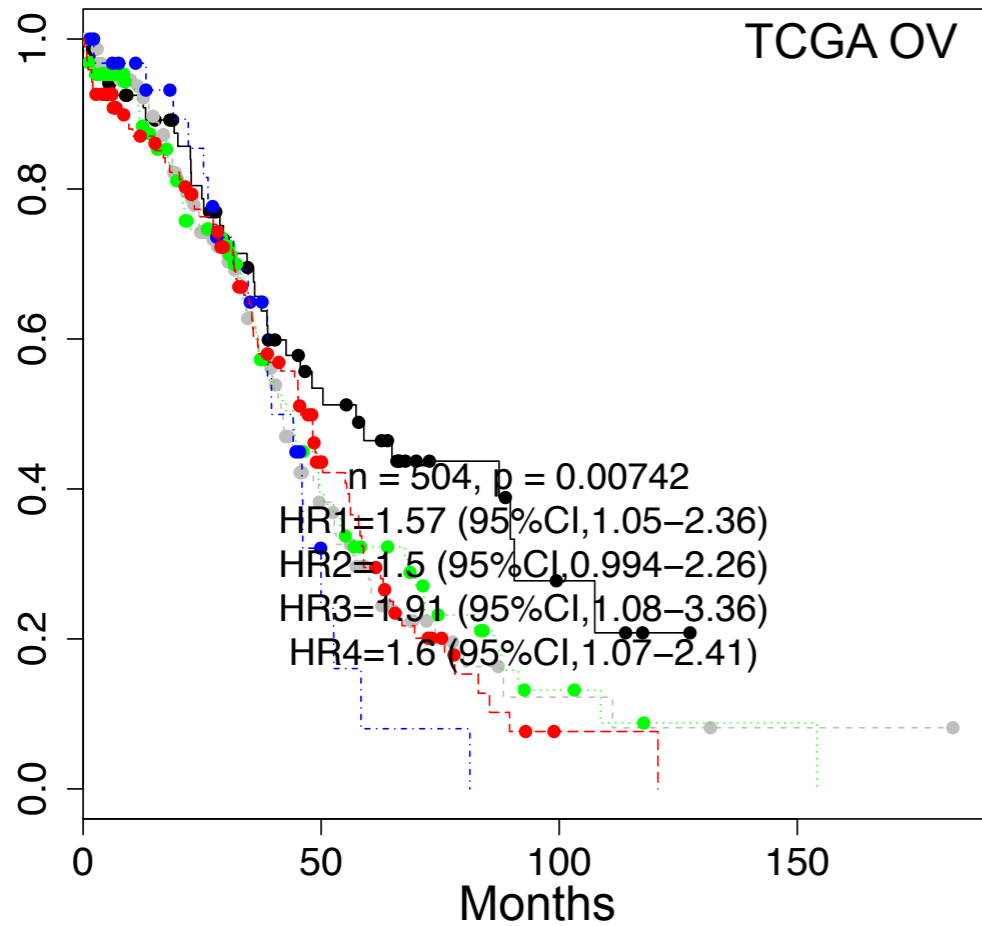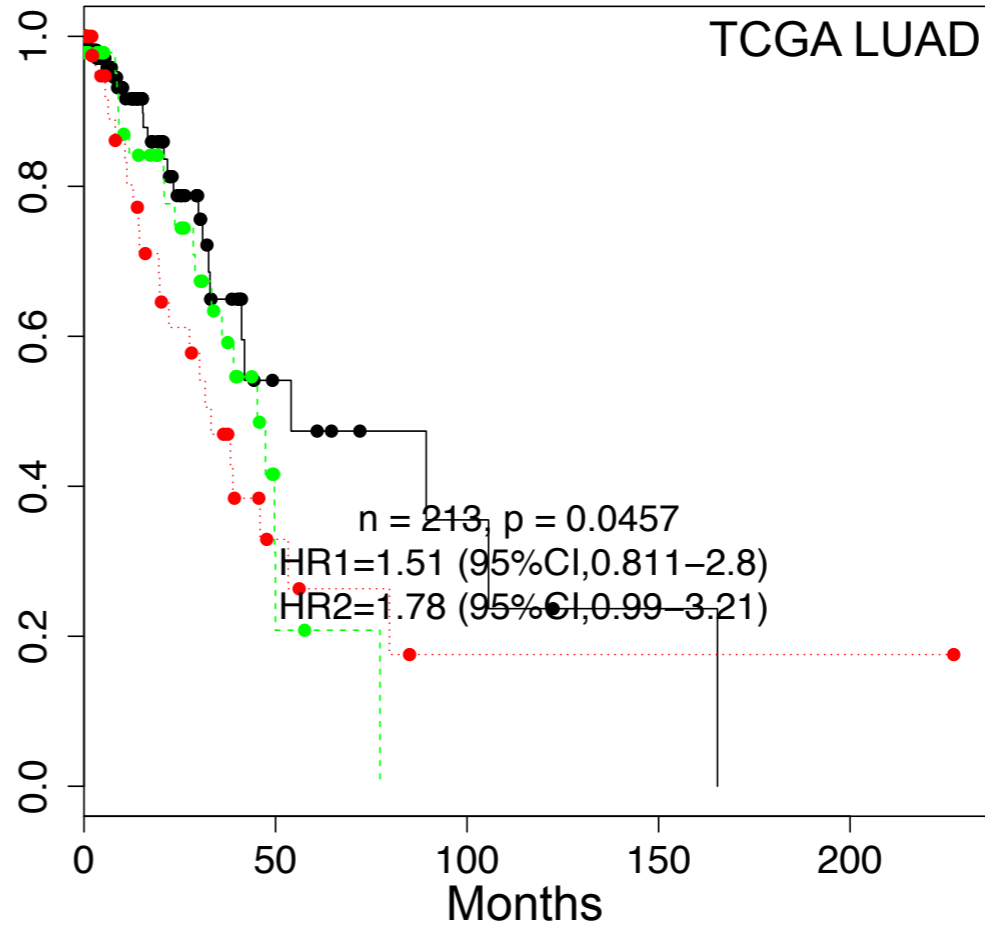

# Supplementary Figure 3

## KM plots

# a. TCGA BLCA

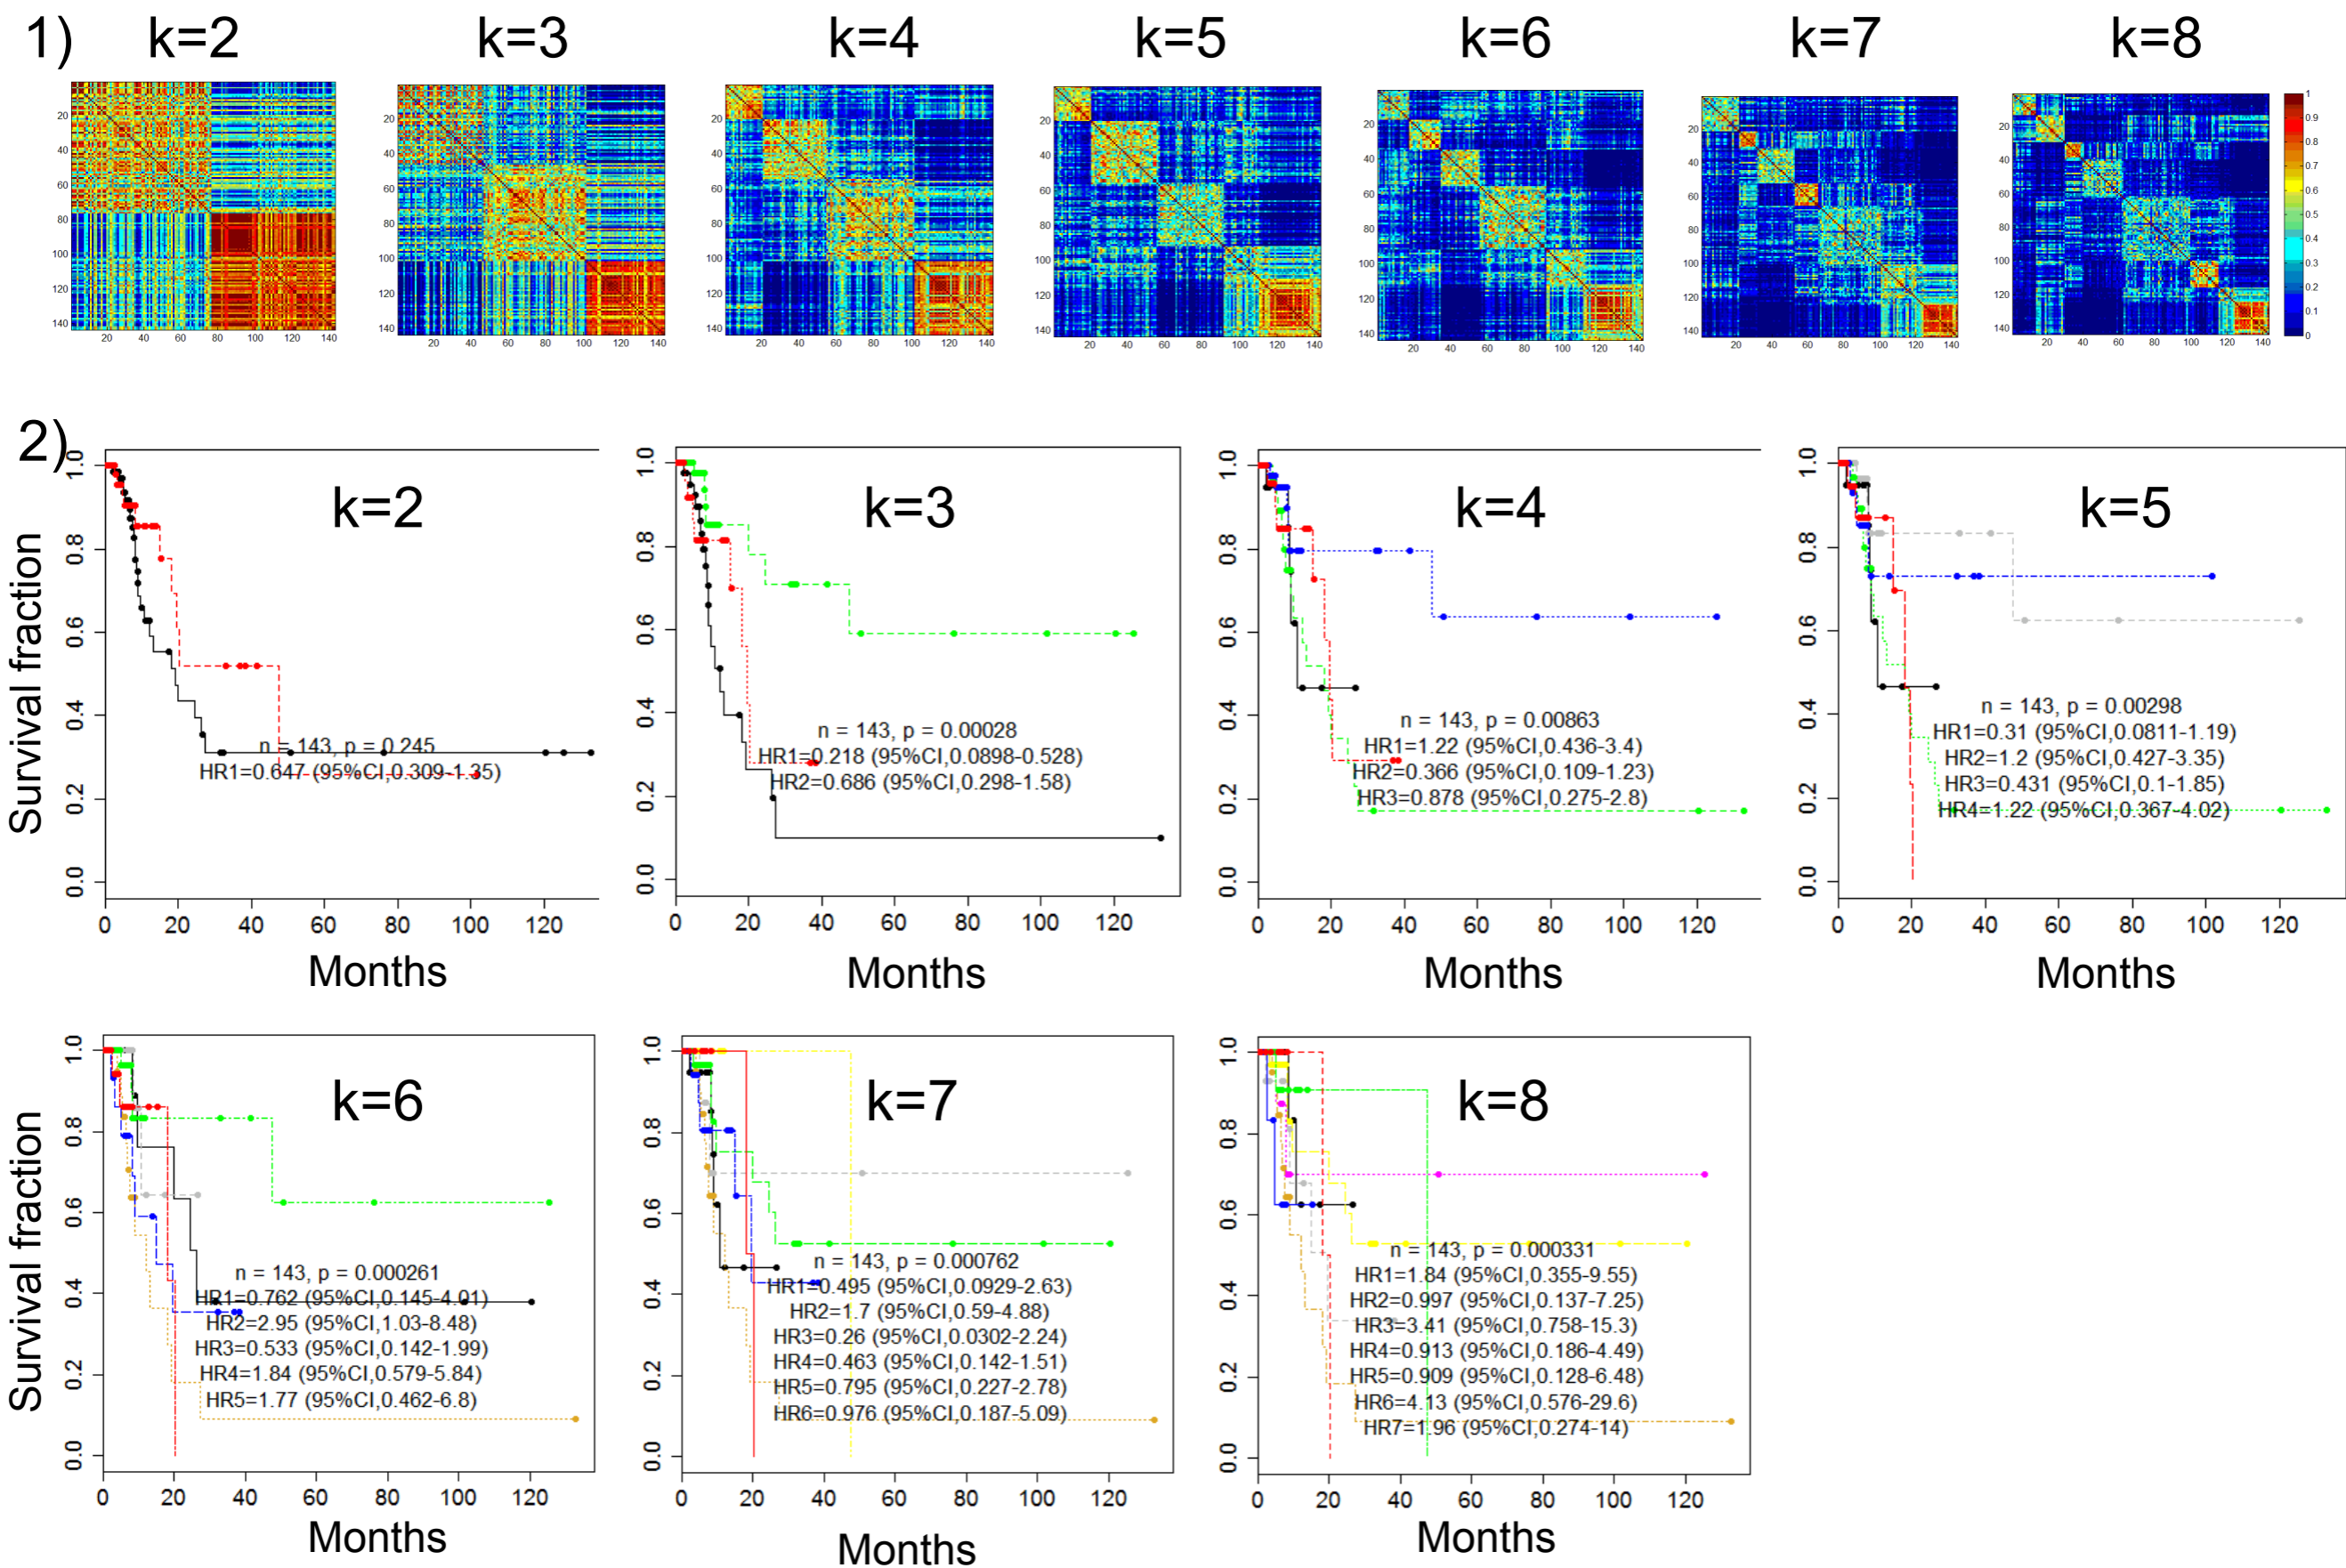

# b. TCGA BRCA

1) **k=2**      **k=3**      **k=4**      **k=5**      **k=6**      **k=7**      **k=8**

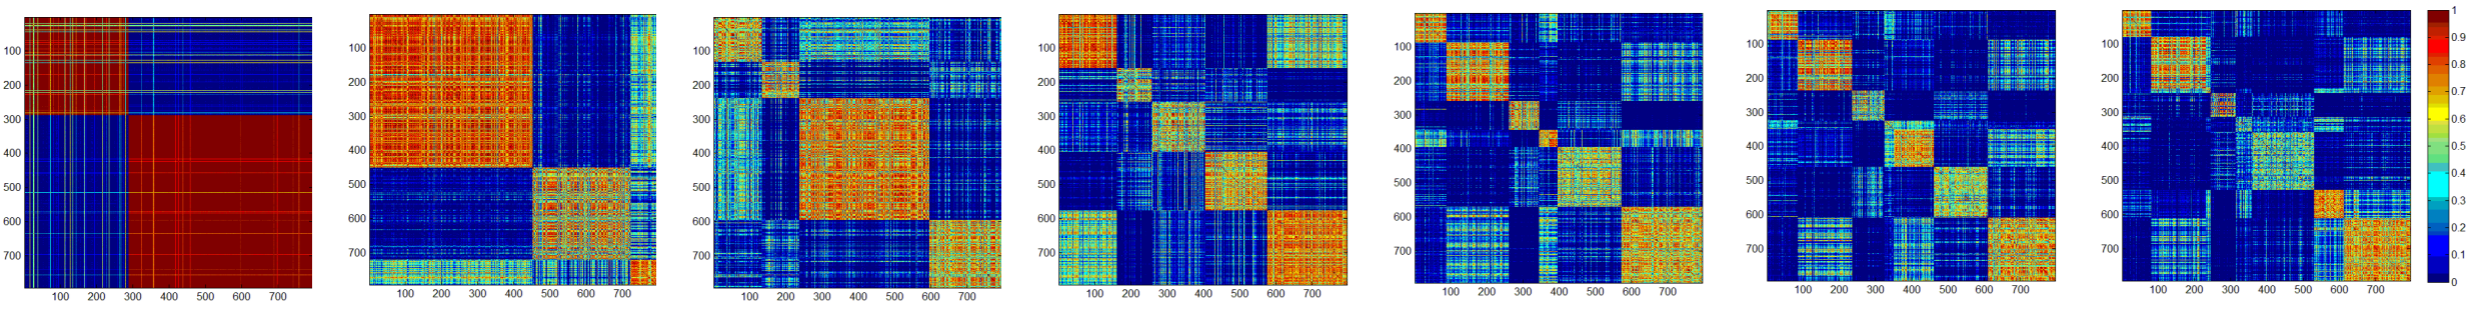

2)

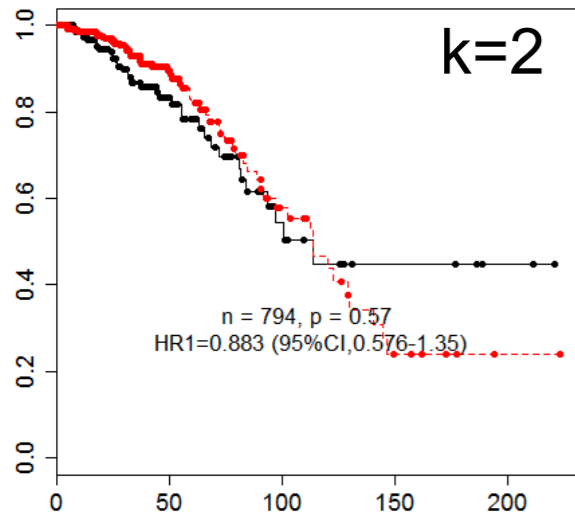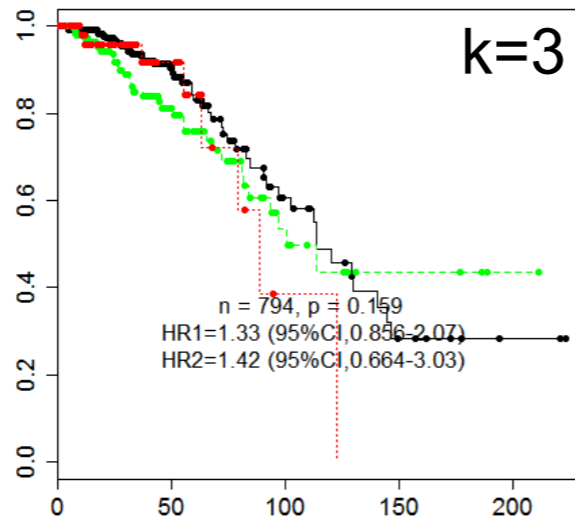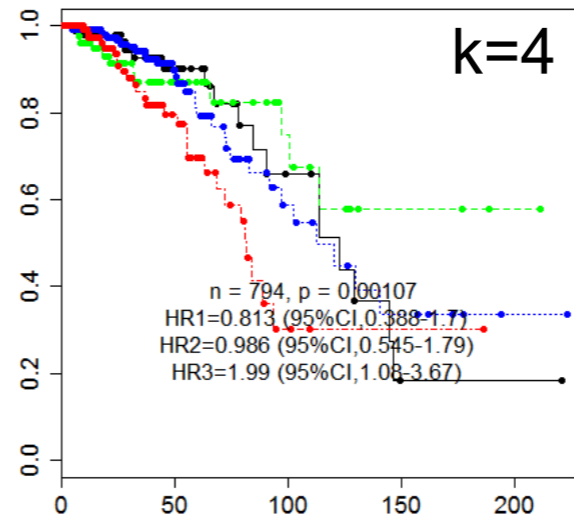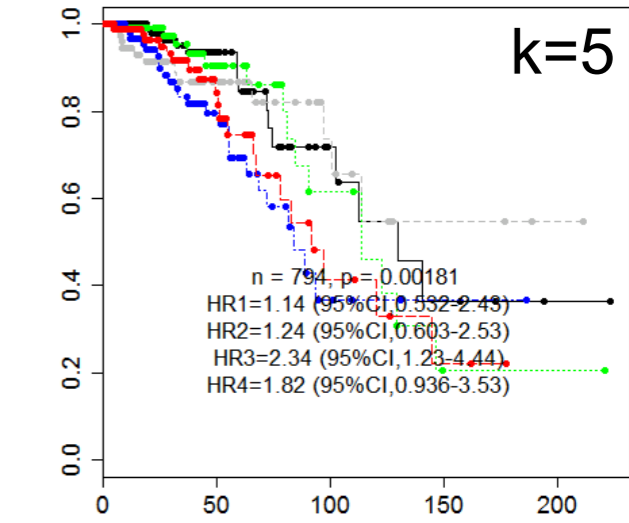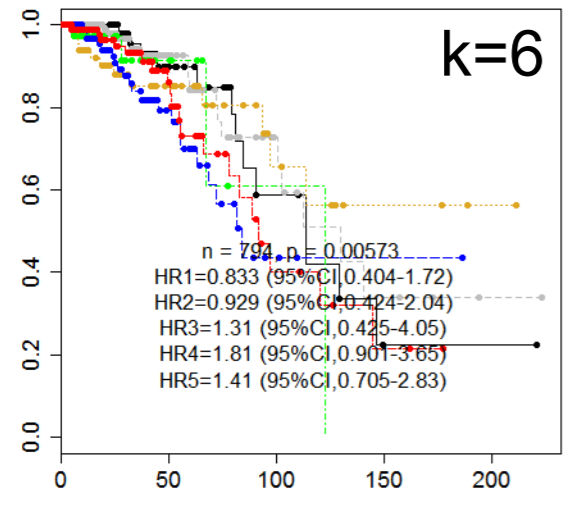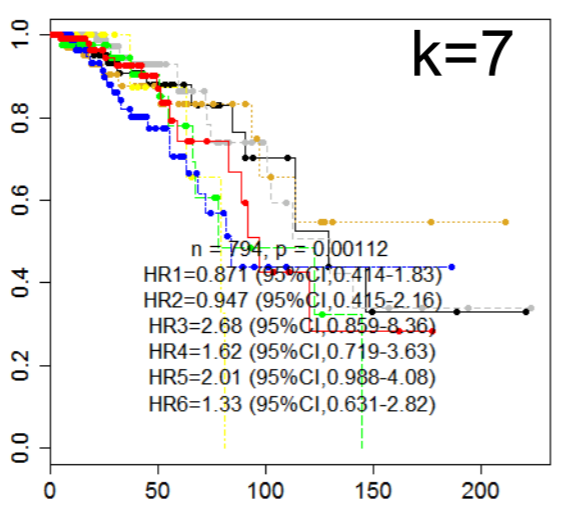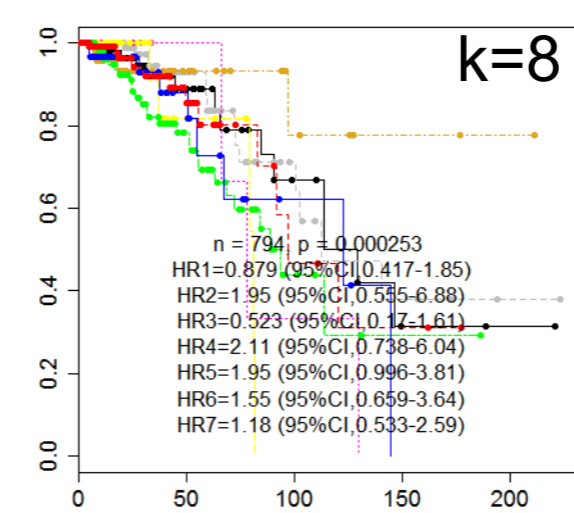

Survival fraction

Months

Months

Months

Months

Months

Months

Months

# c. TCGA GBM

1) k=2      k=3      k=4      k=5      k=6      k=7      k=8

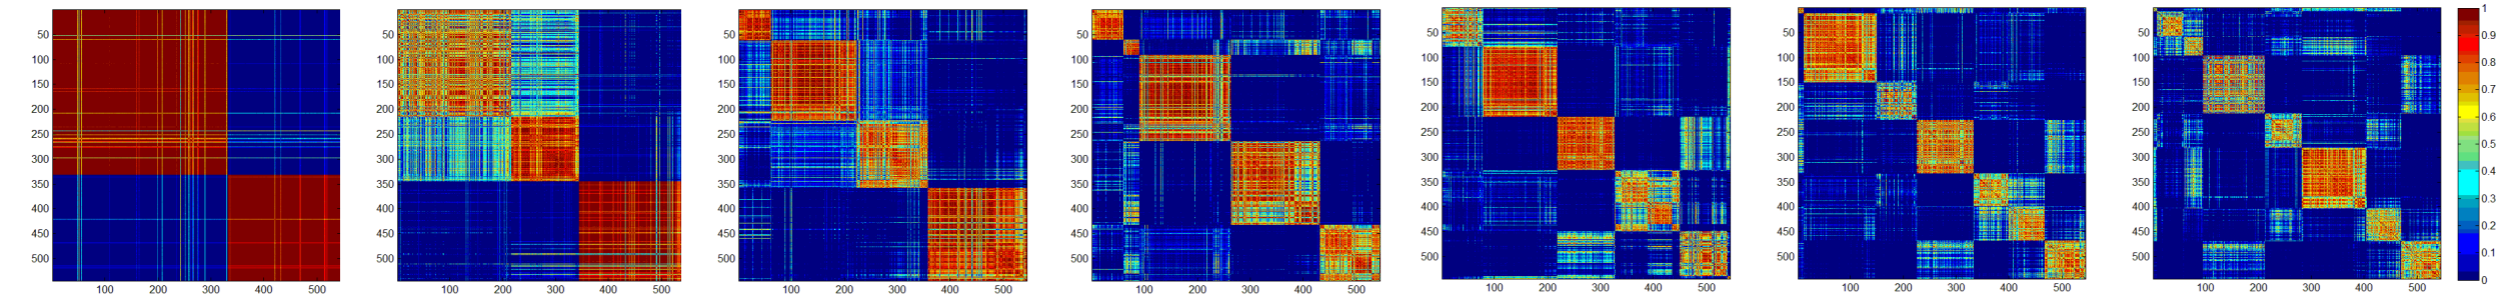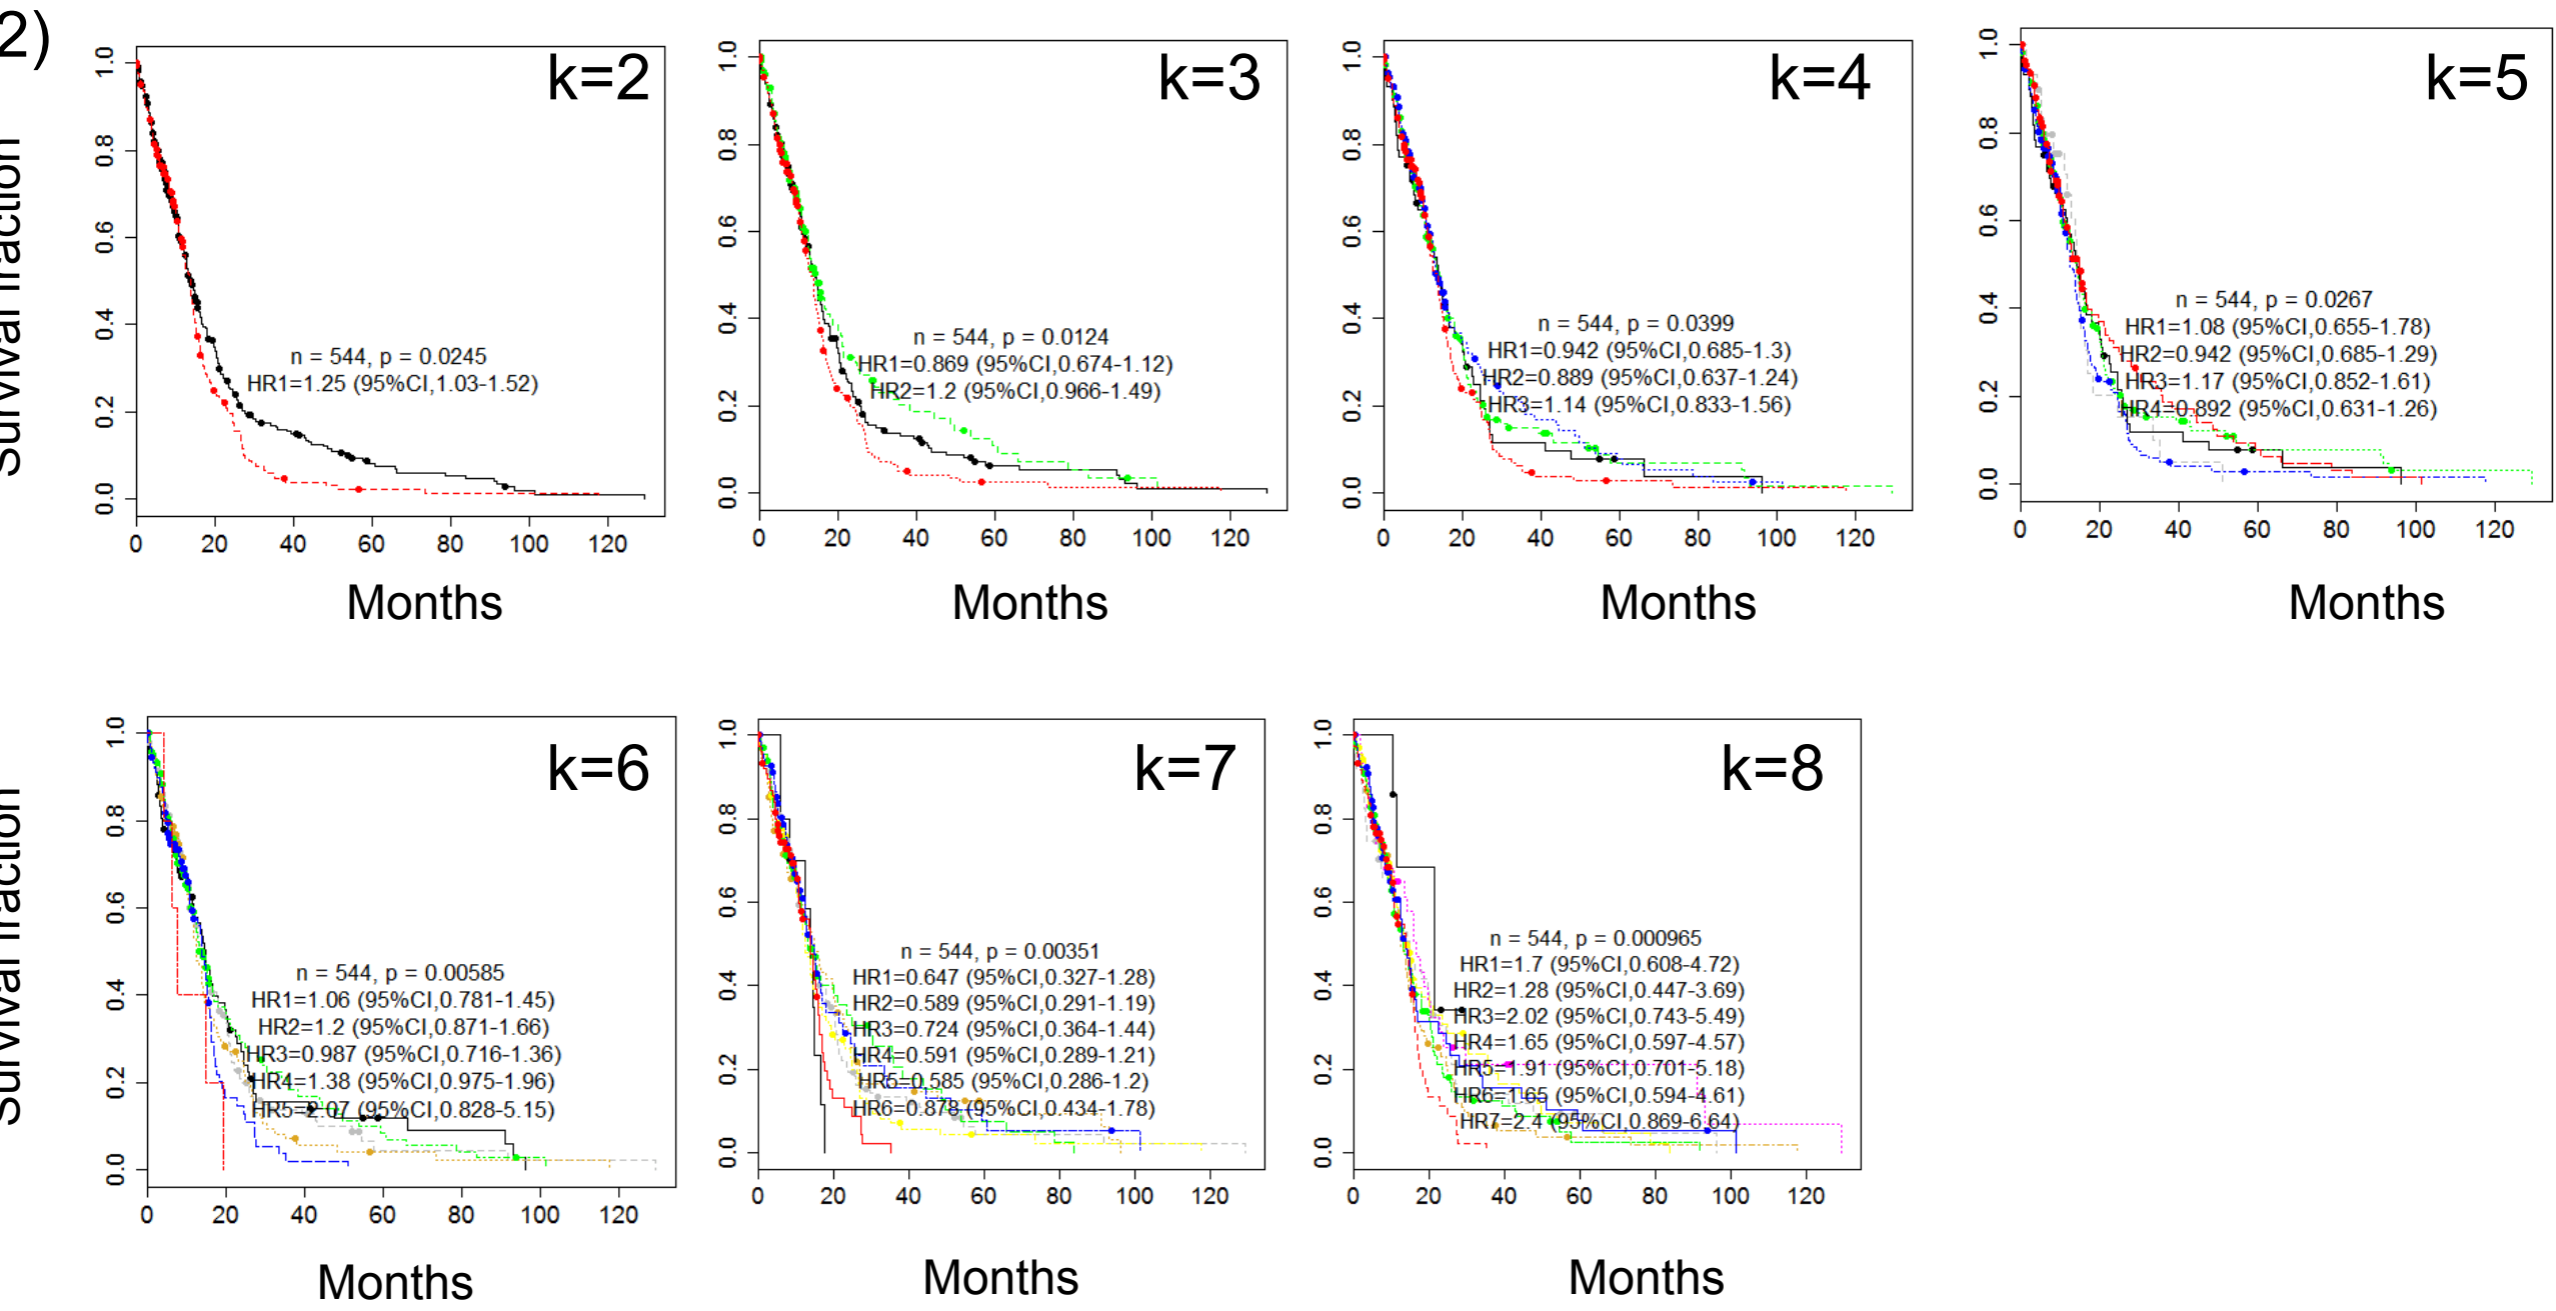



# d.TCGA HNSC

1) k=2      k=3      k=4      k=5      k=6      k=7      k=8

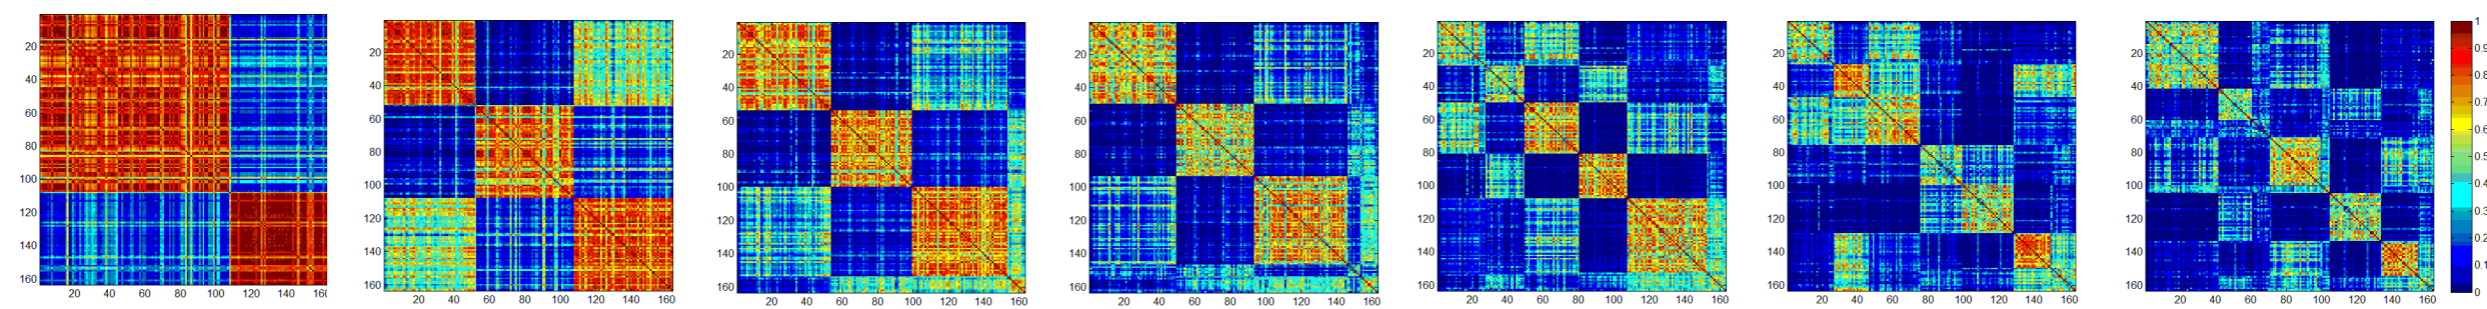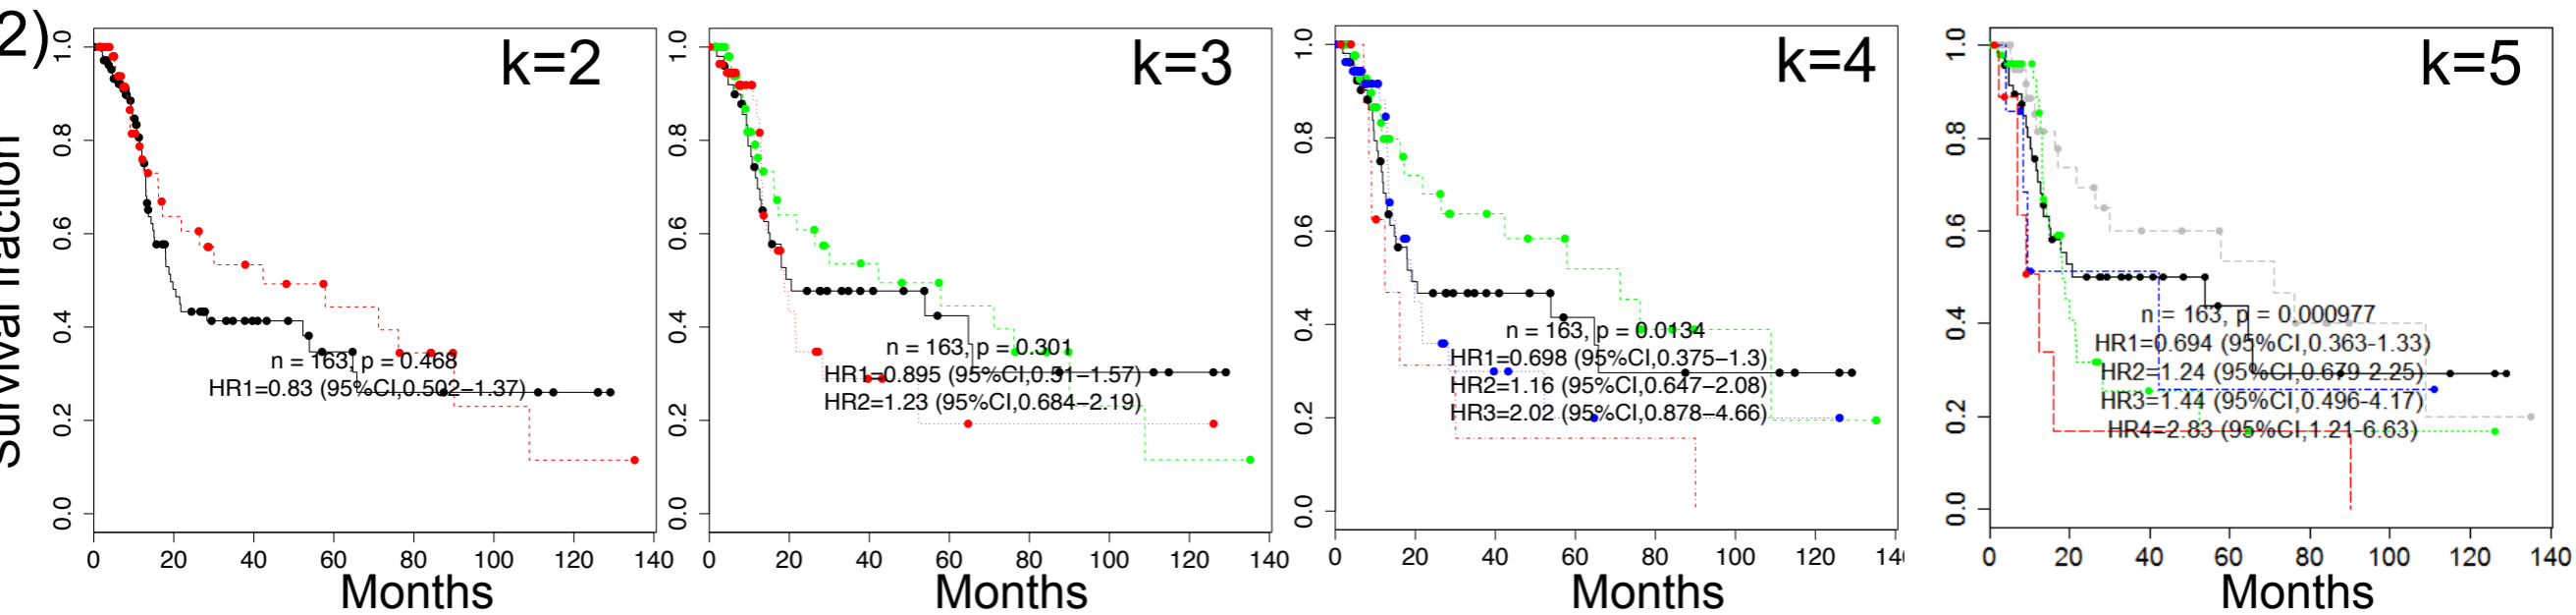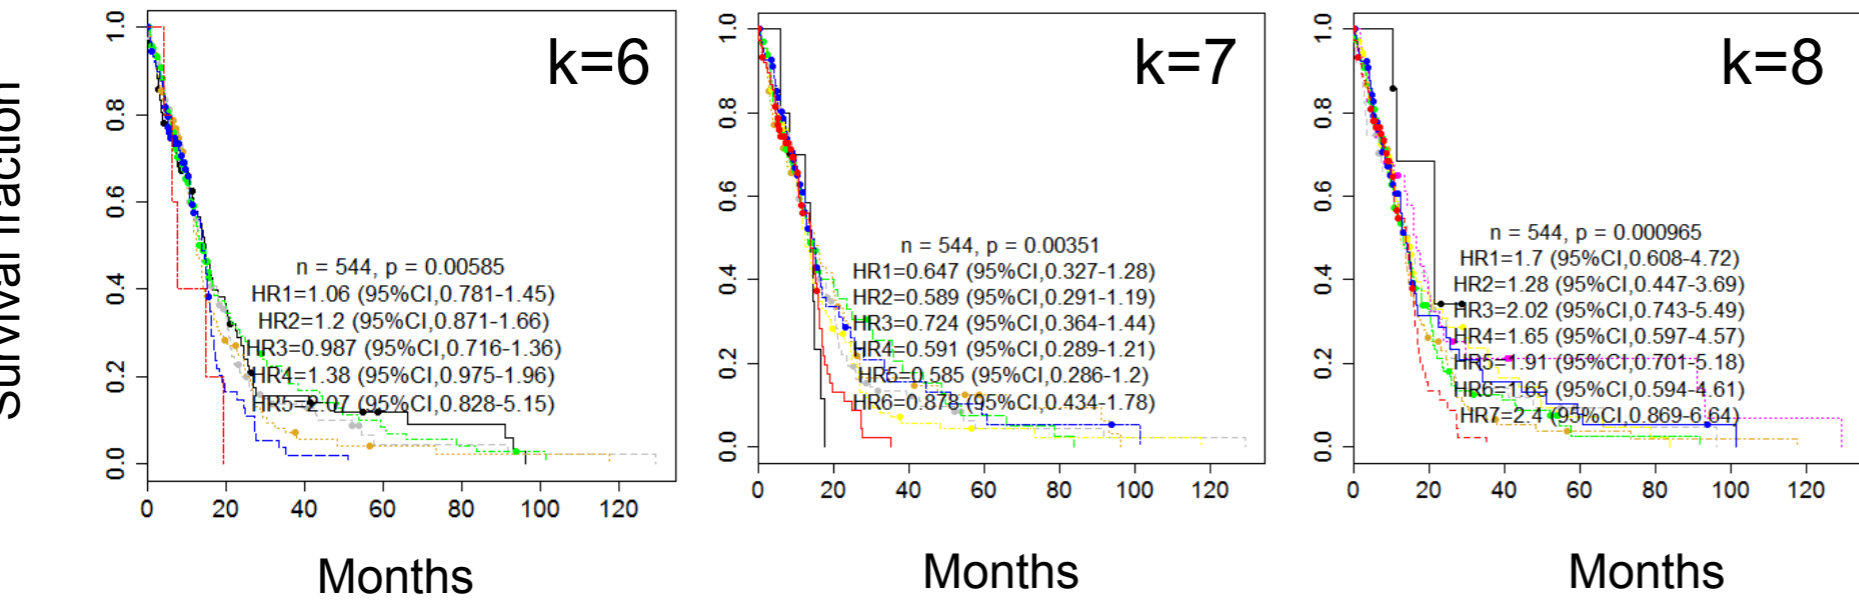

# e. TCGA KIRC

1) k=2      k=3      k=4      k=5      k=6      k=7      k=8

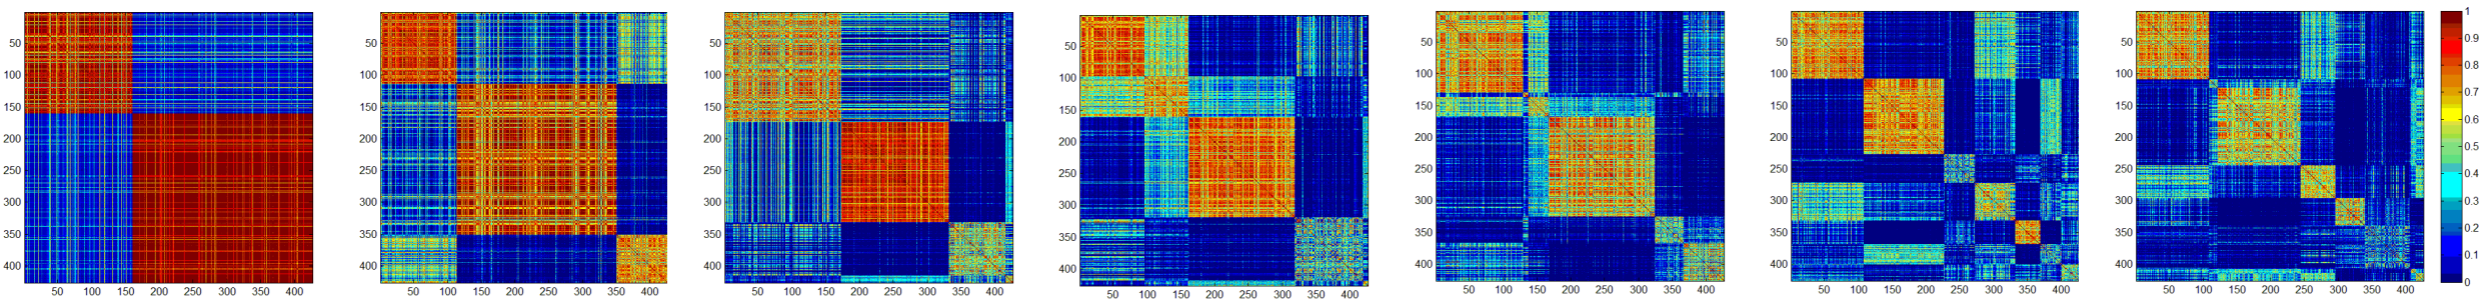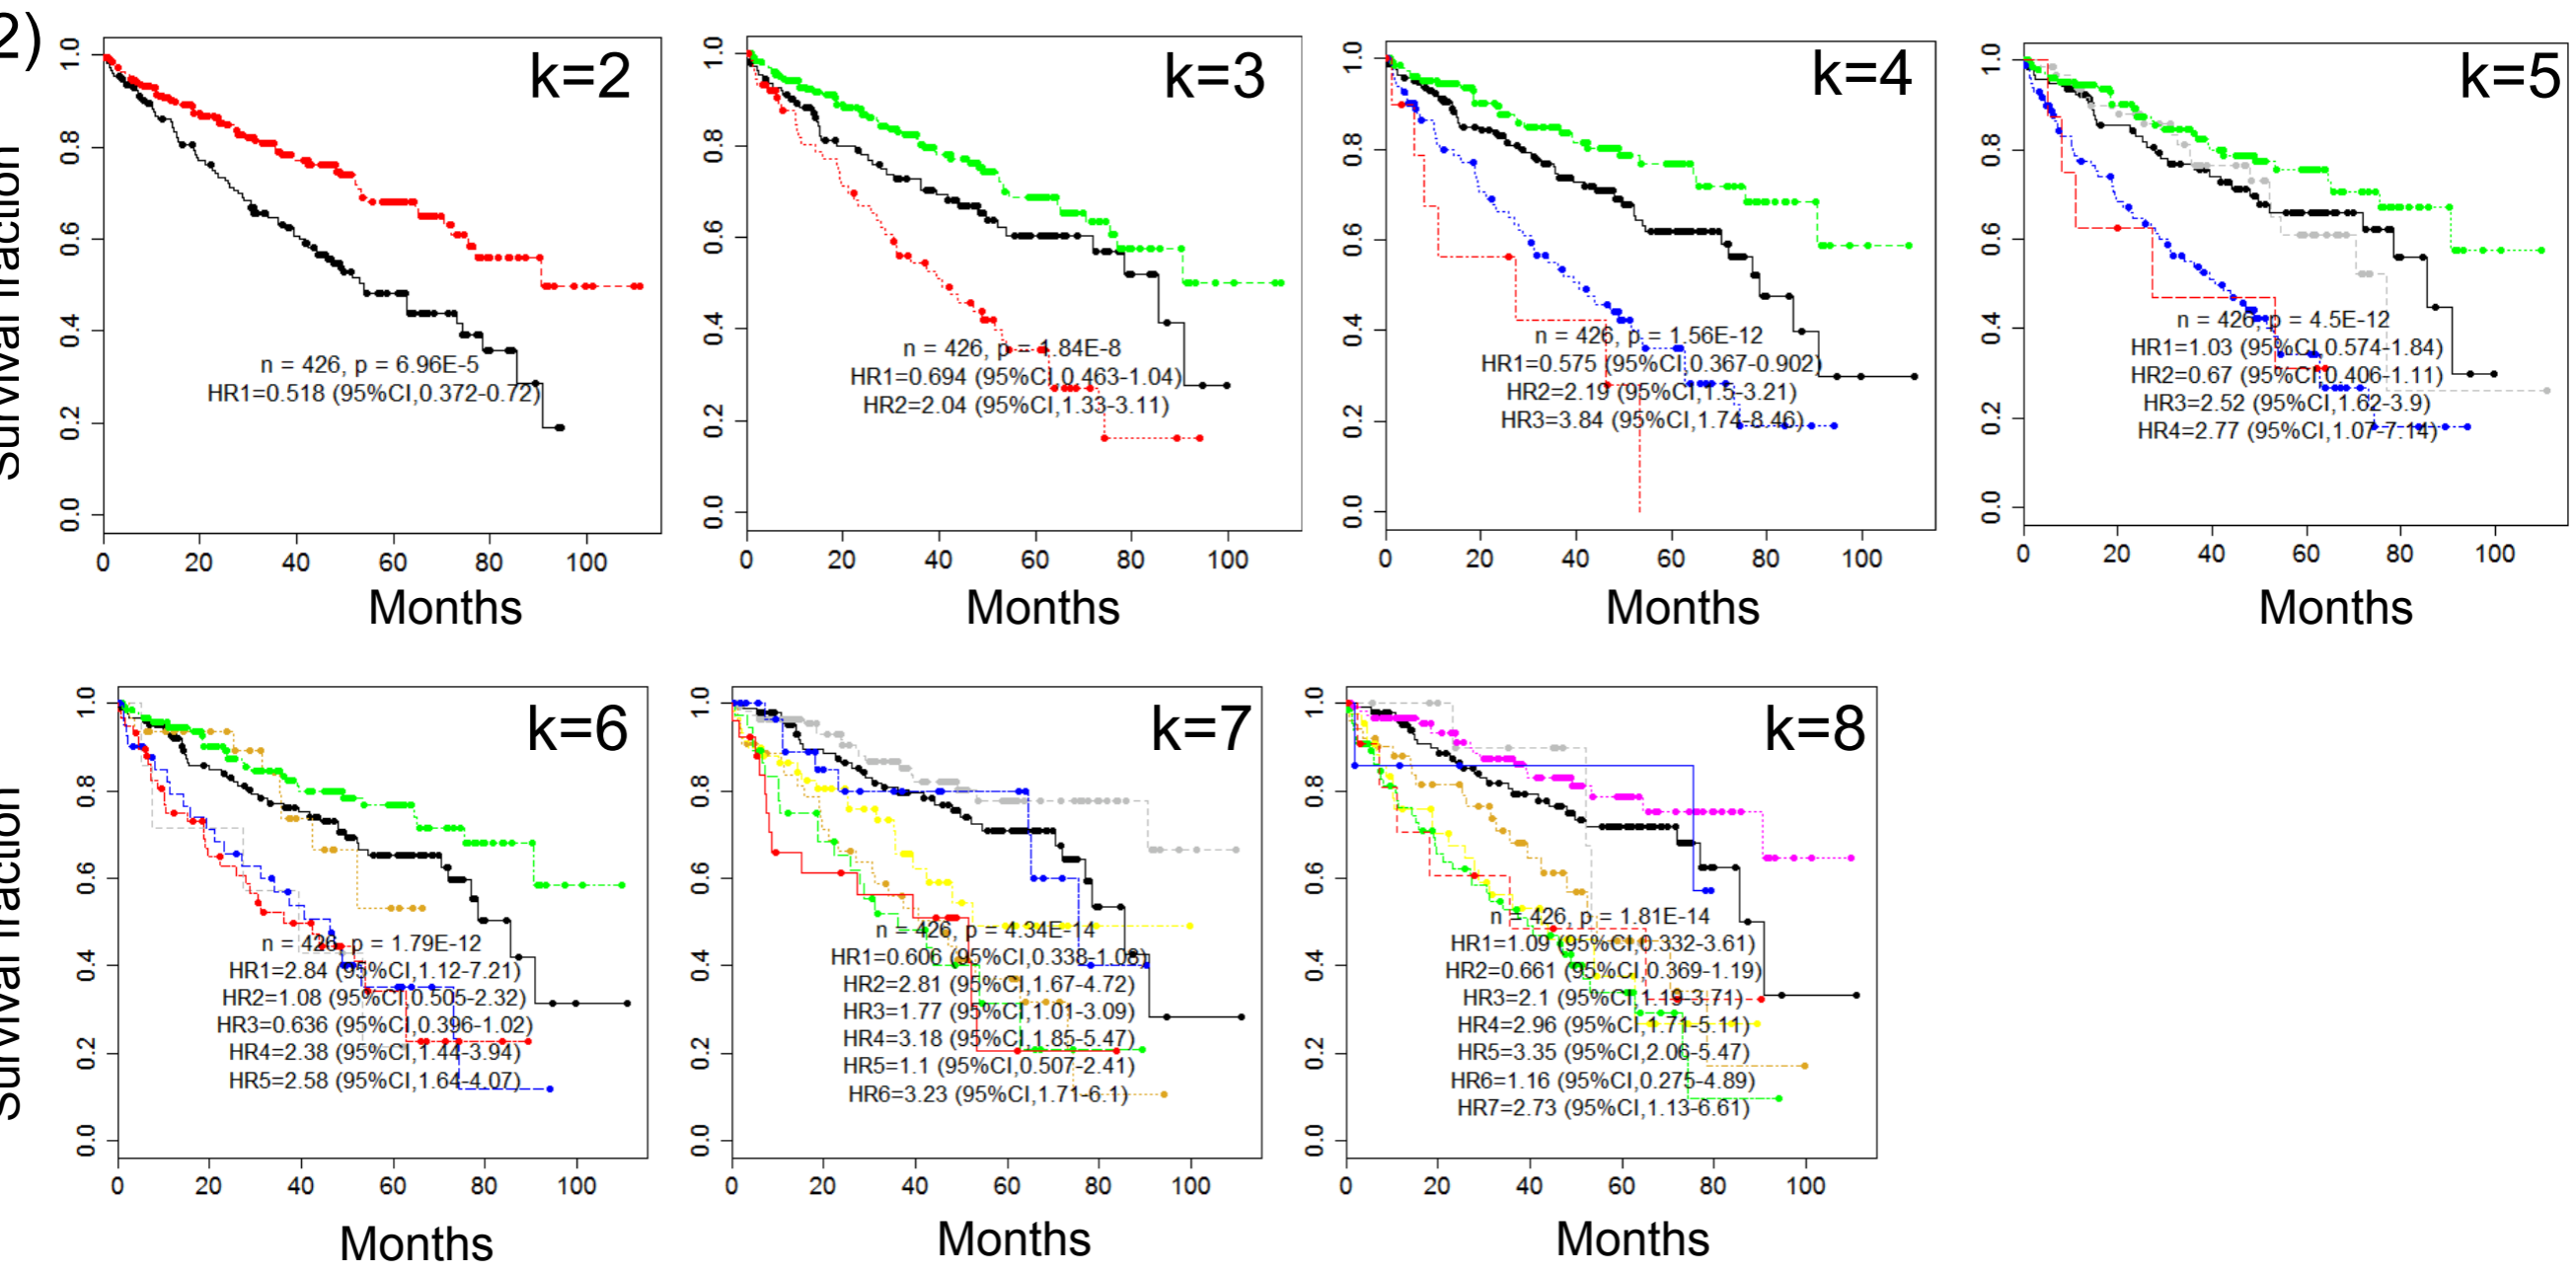

# f. TCGA LAML

1) **k=2**      **k=3**      **k=4**      **k=5**      **k=6**      **k=7**      **k=8**

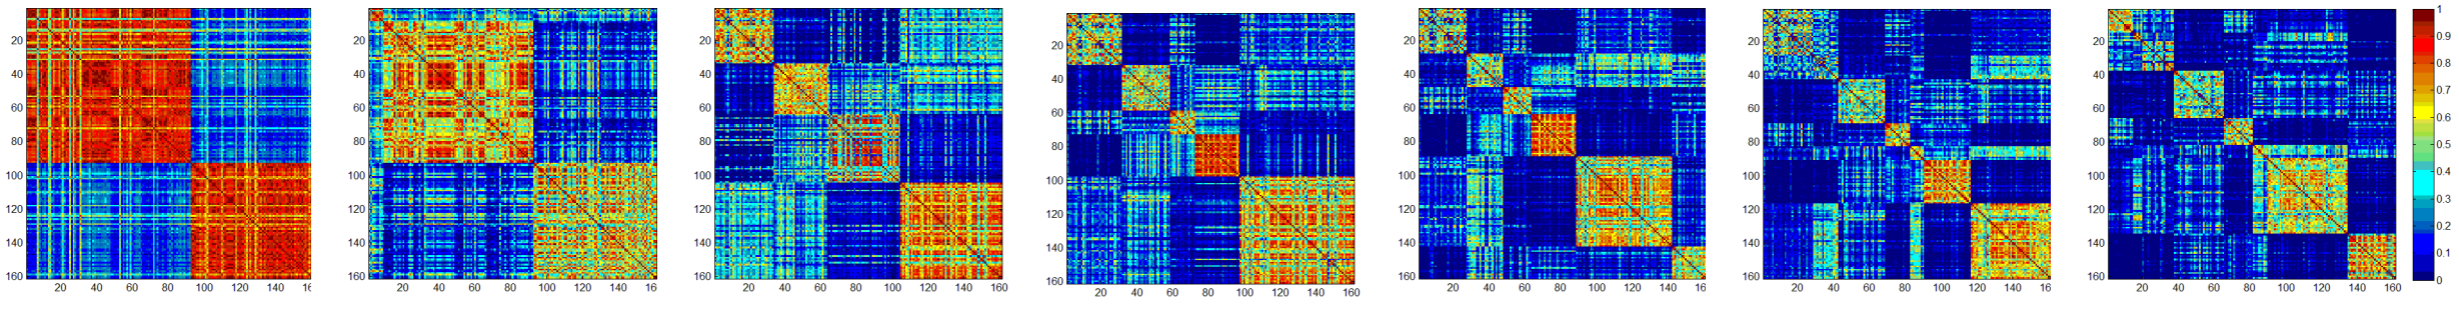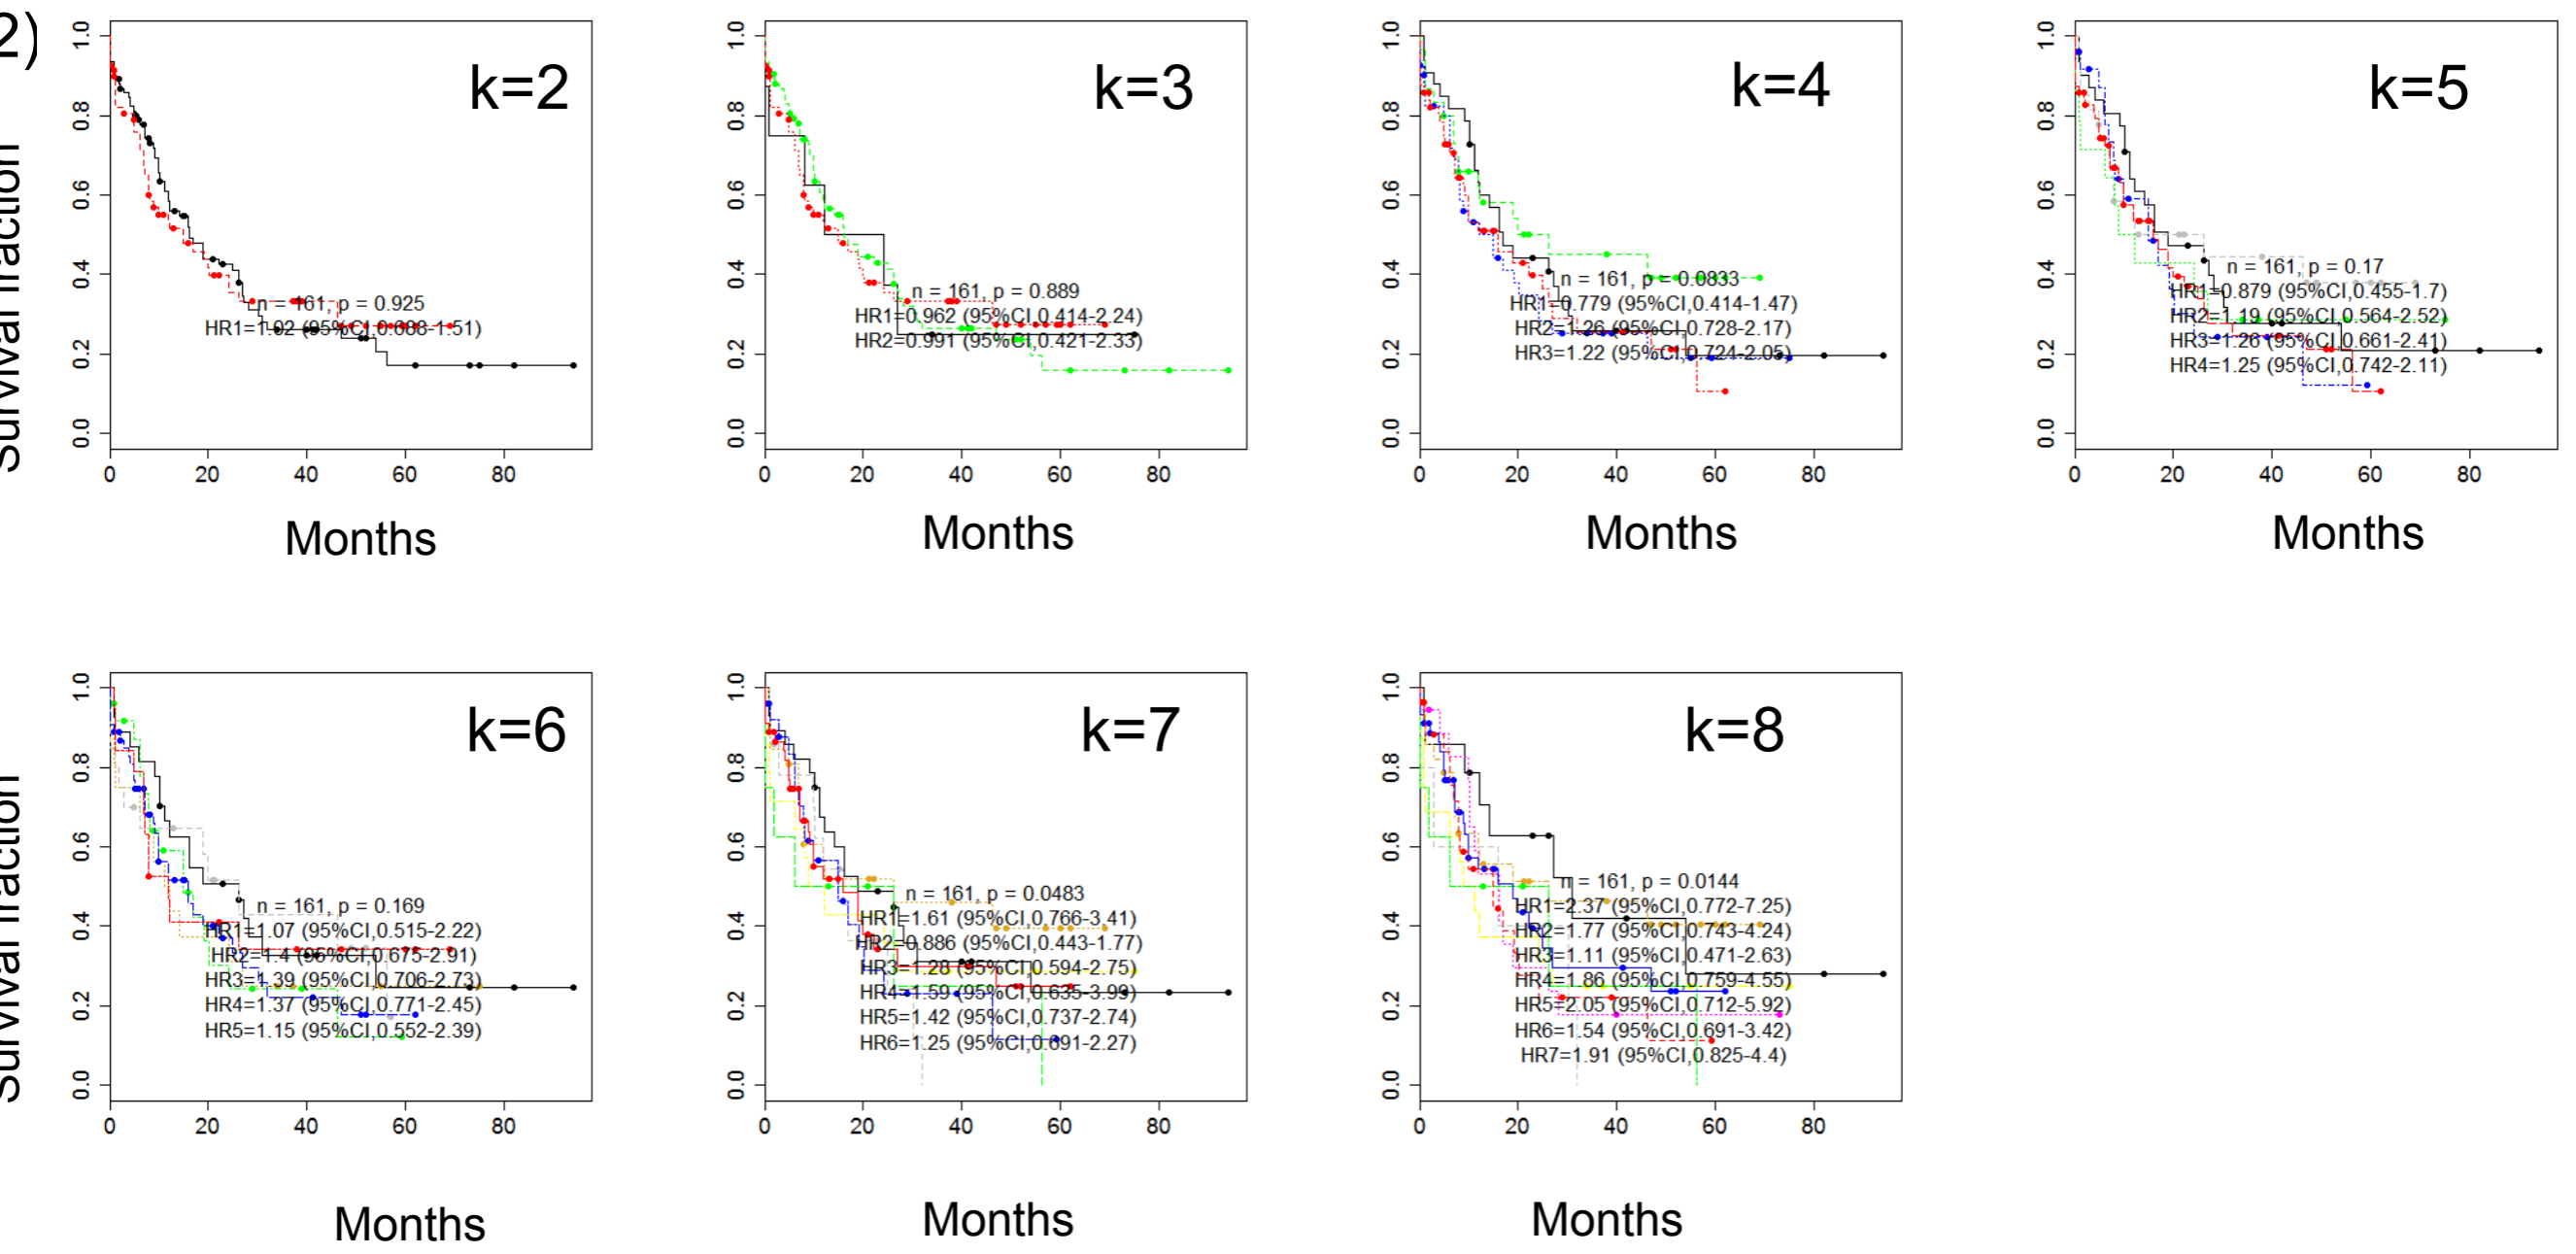

# g. TCGA LGG

1) **k=2**      **k=3**      **k=4**      **k=5**      **k=6**      **k=7**      **k=8**

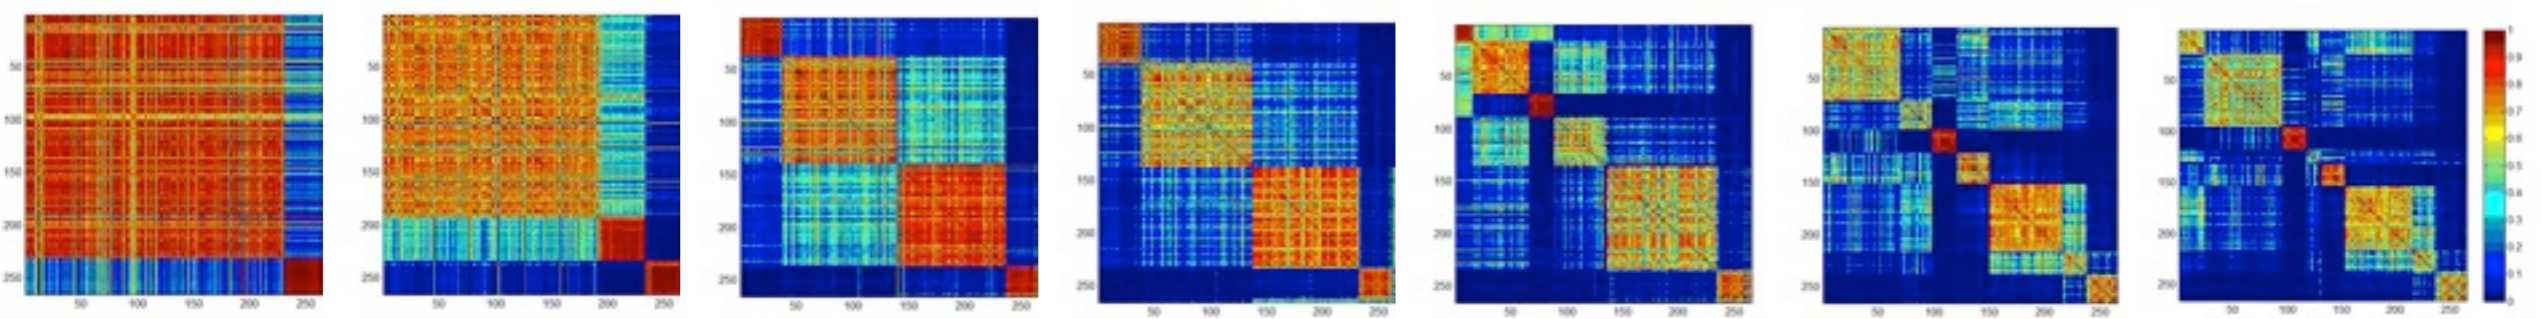

2)

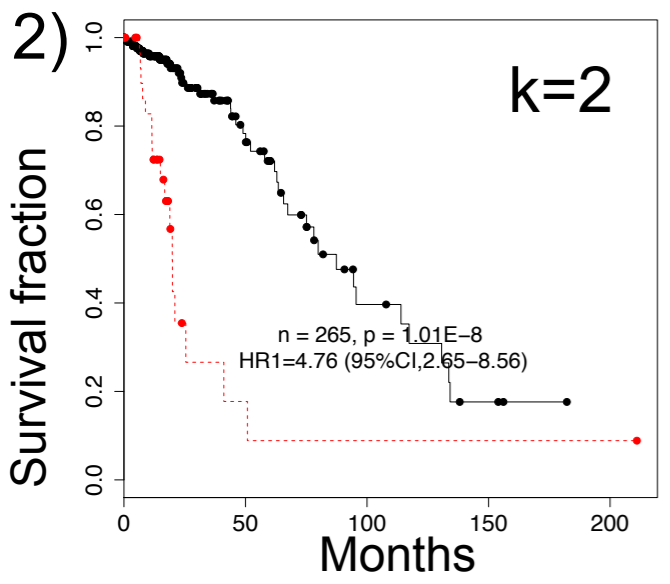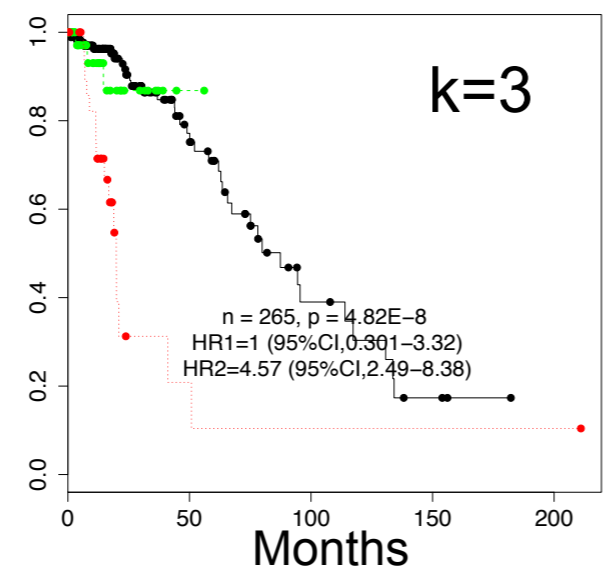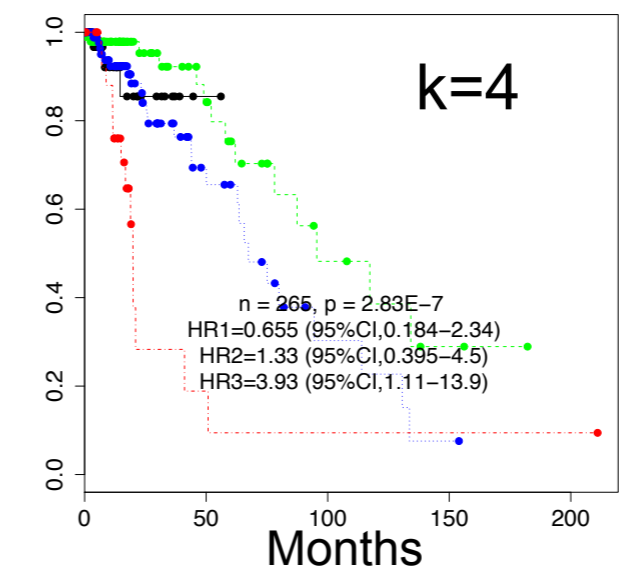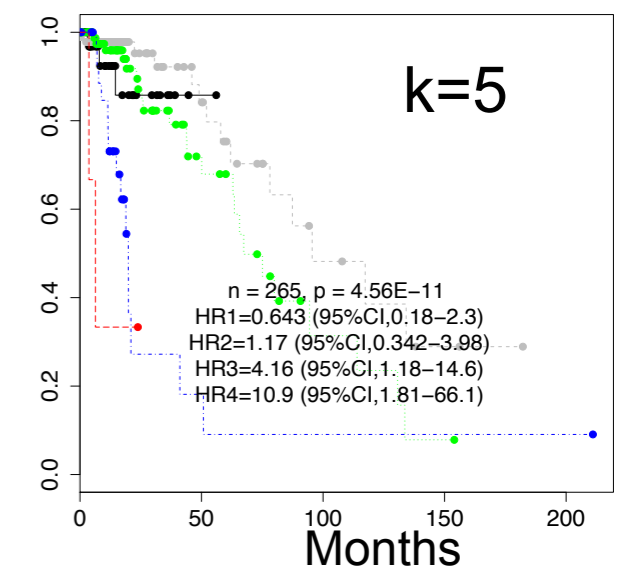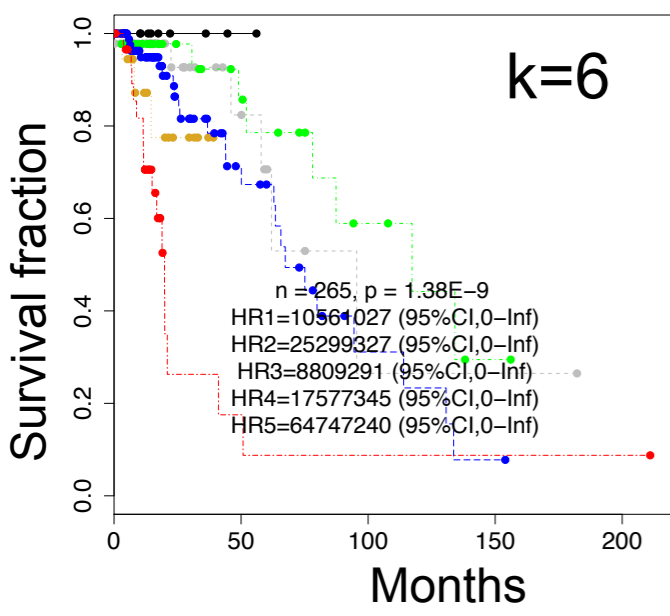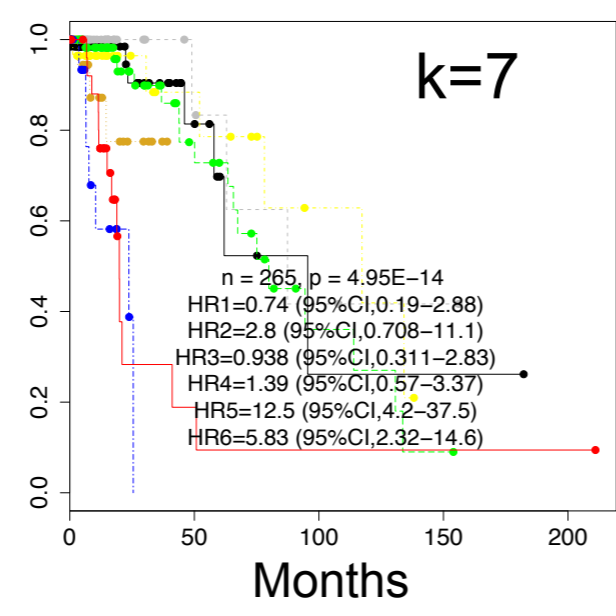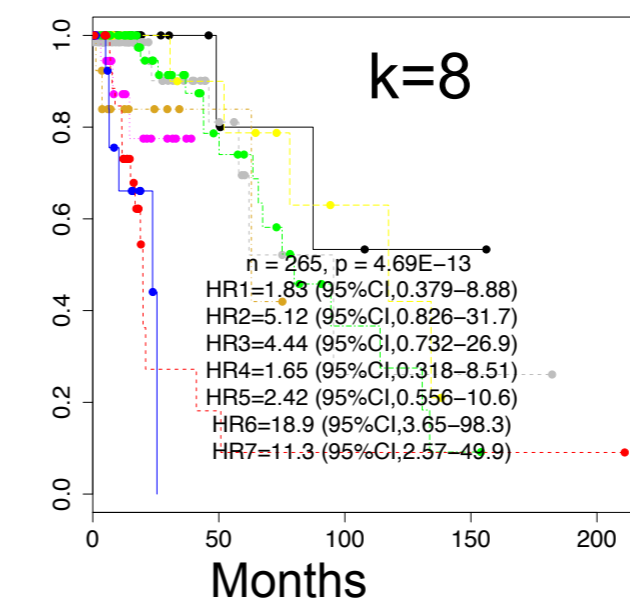

# h.TCGA LUAD

1) k=2

k=3

k=4

k=5

k=6

k=7

k=8

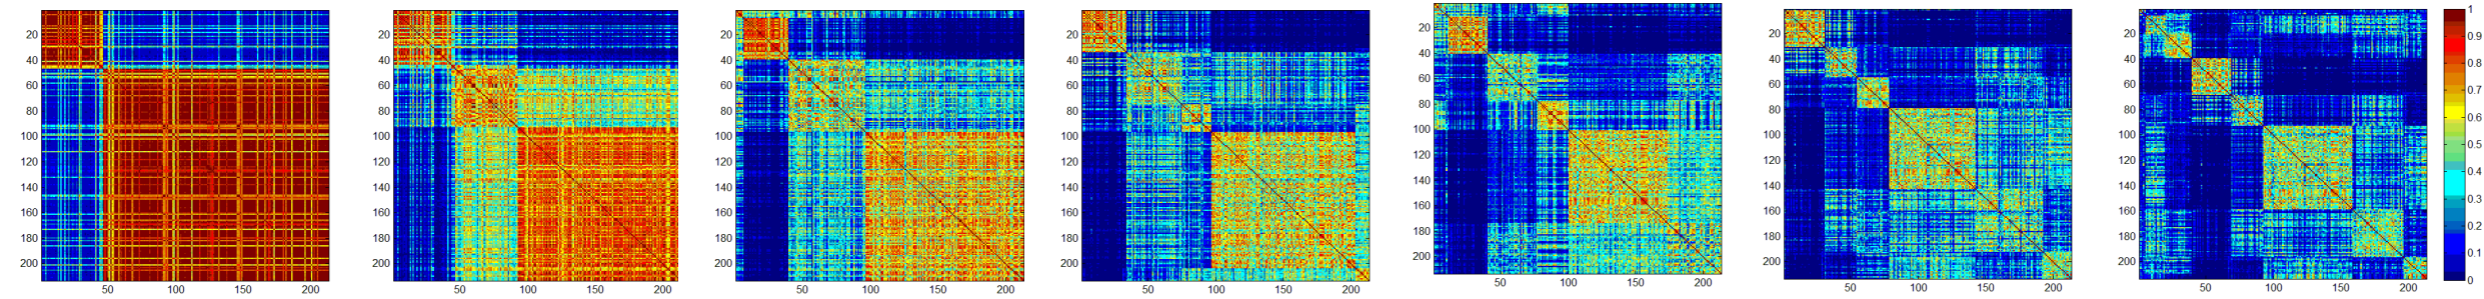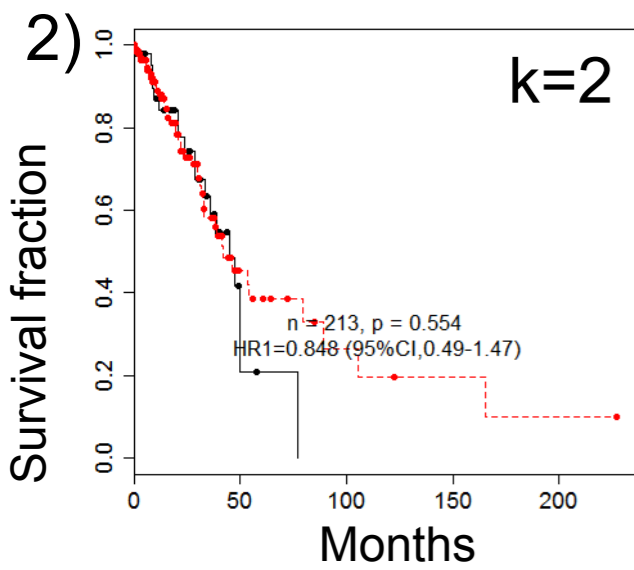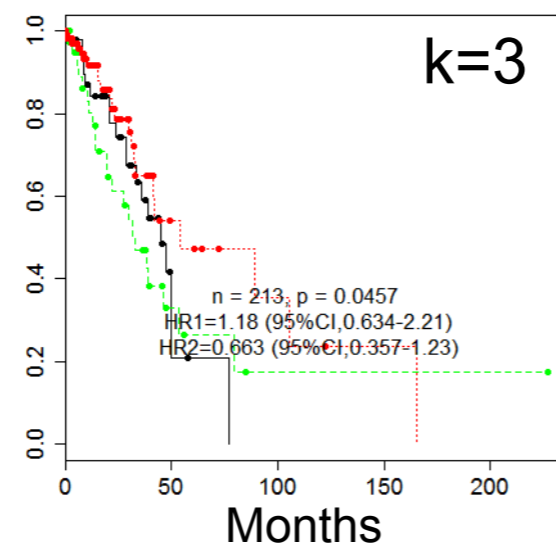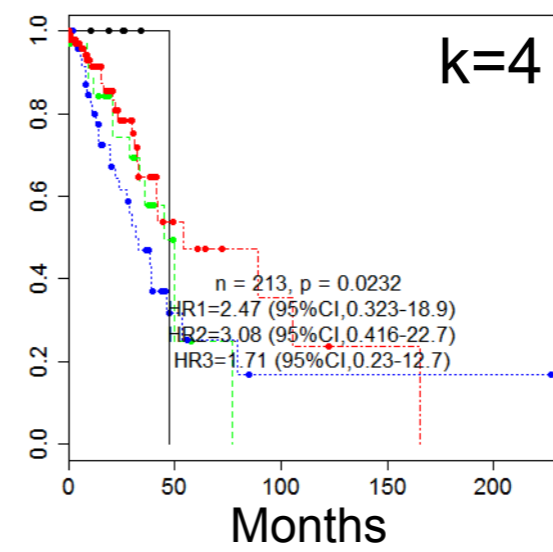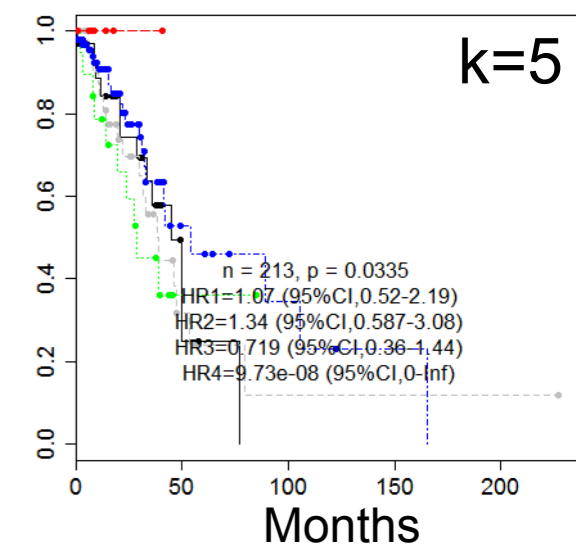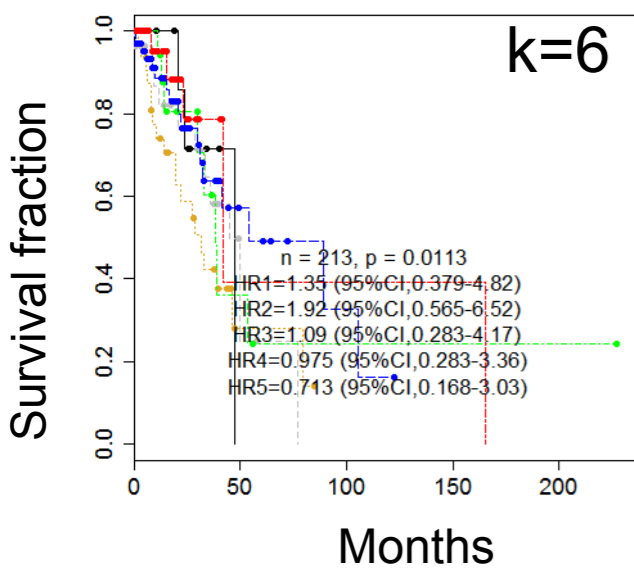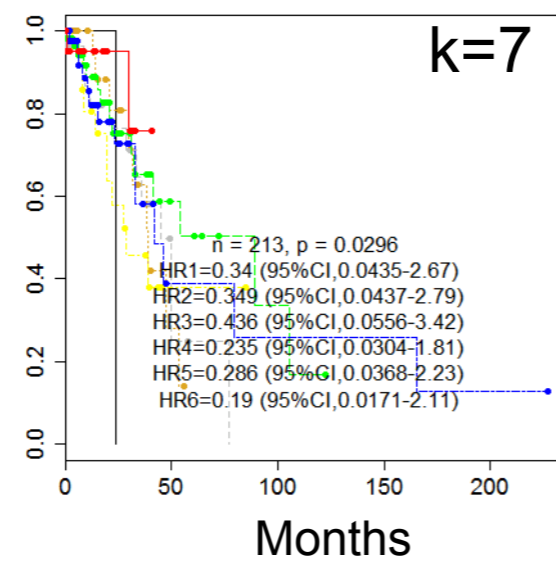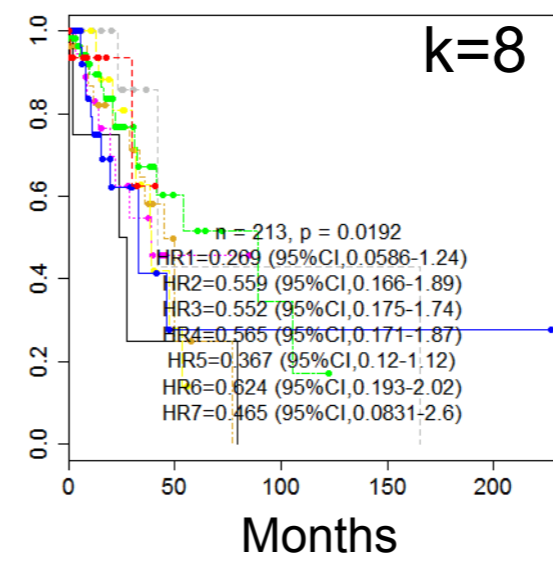

# i. TCGA OV

1) k=2      k=3      k=4      k=5      k=6      k=7      k=8

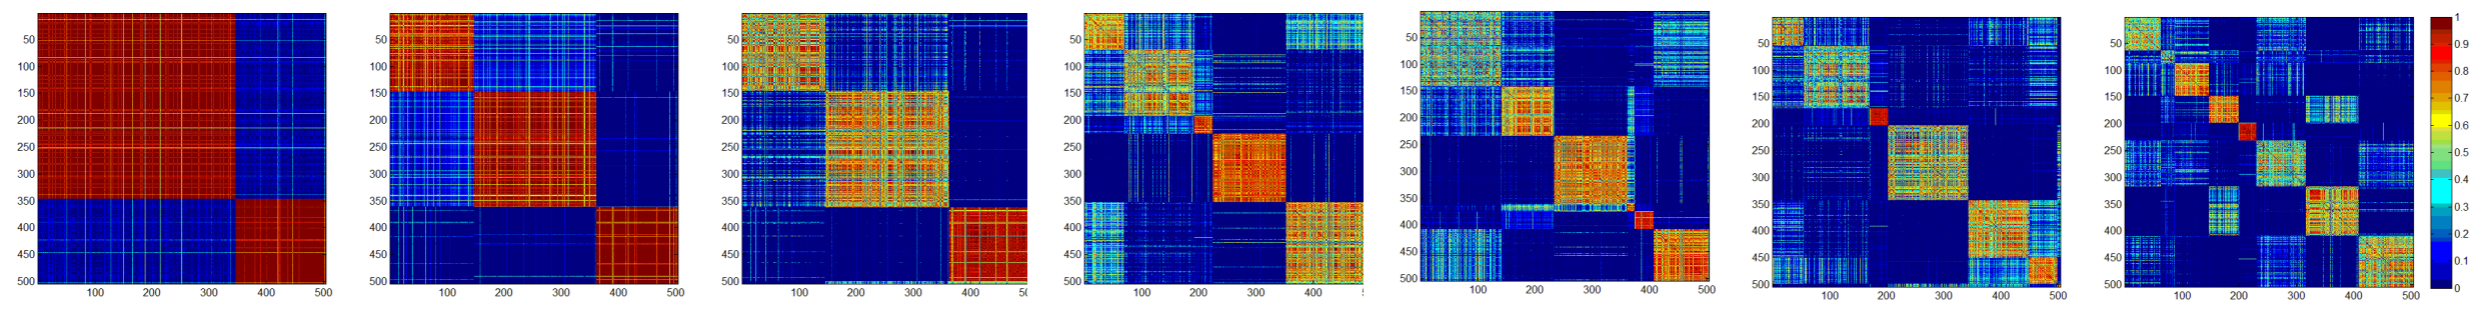

2)

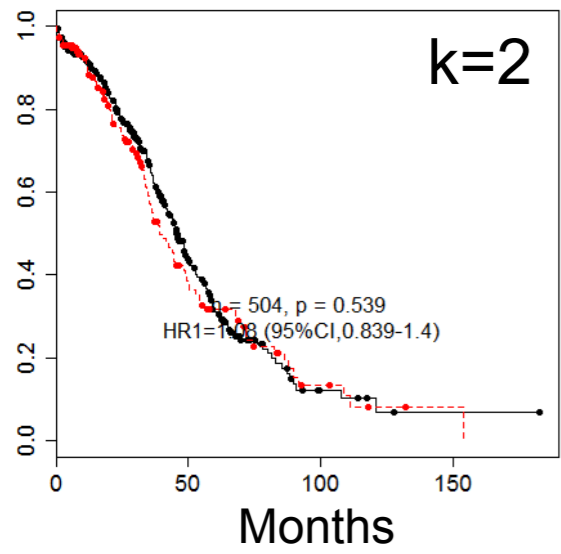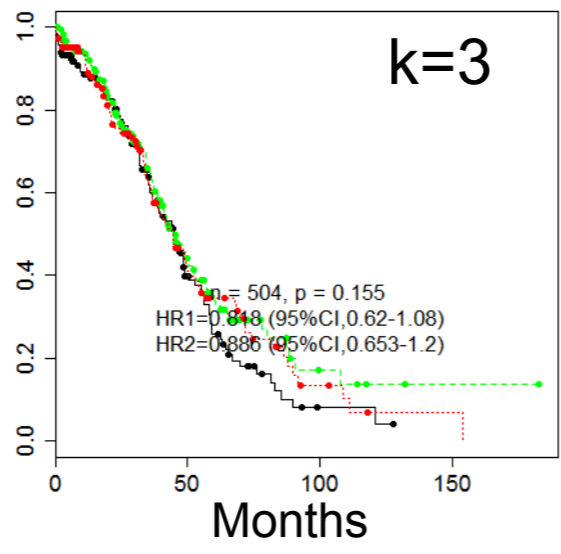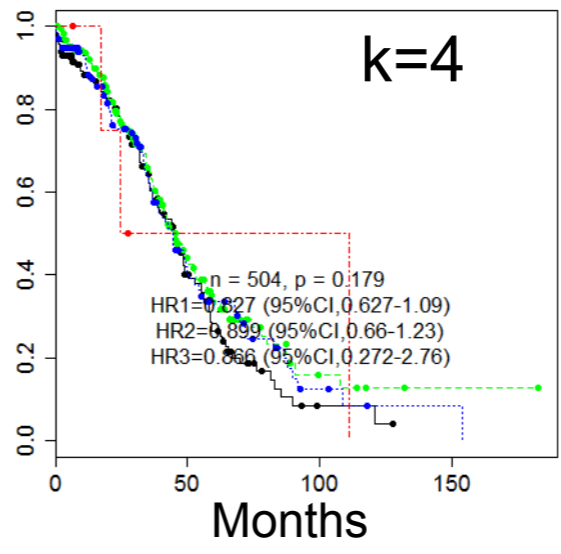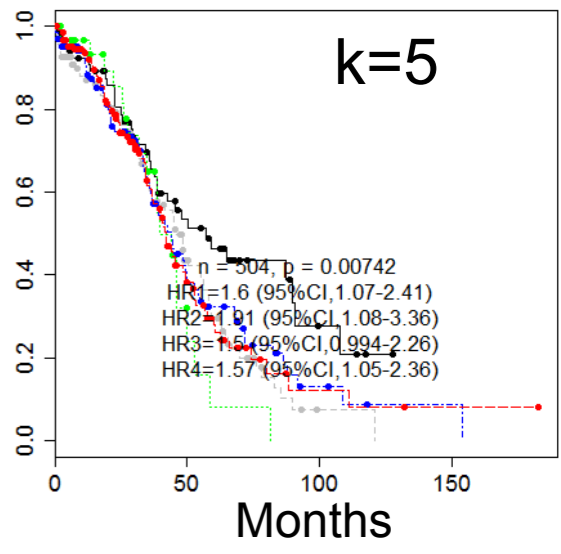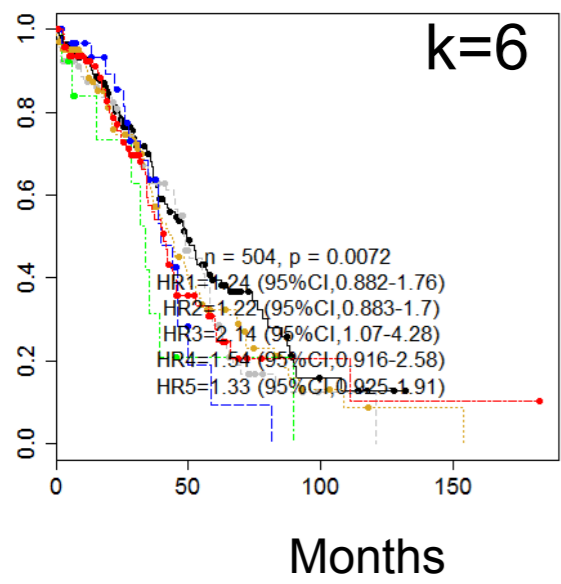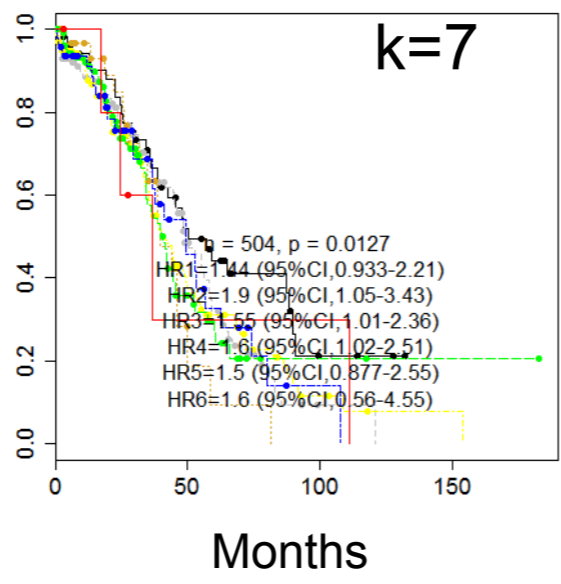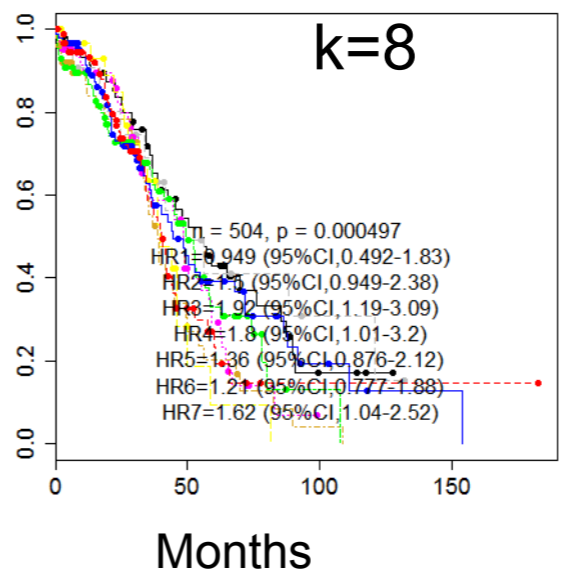

# j.TCGA SKCM

1)  $k=2$        $k=3$        $k=4$        $k=5$        $k=6$        $k=7$        $k=8$

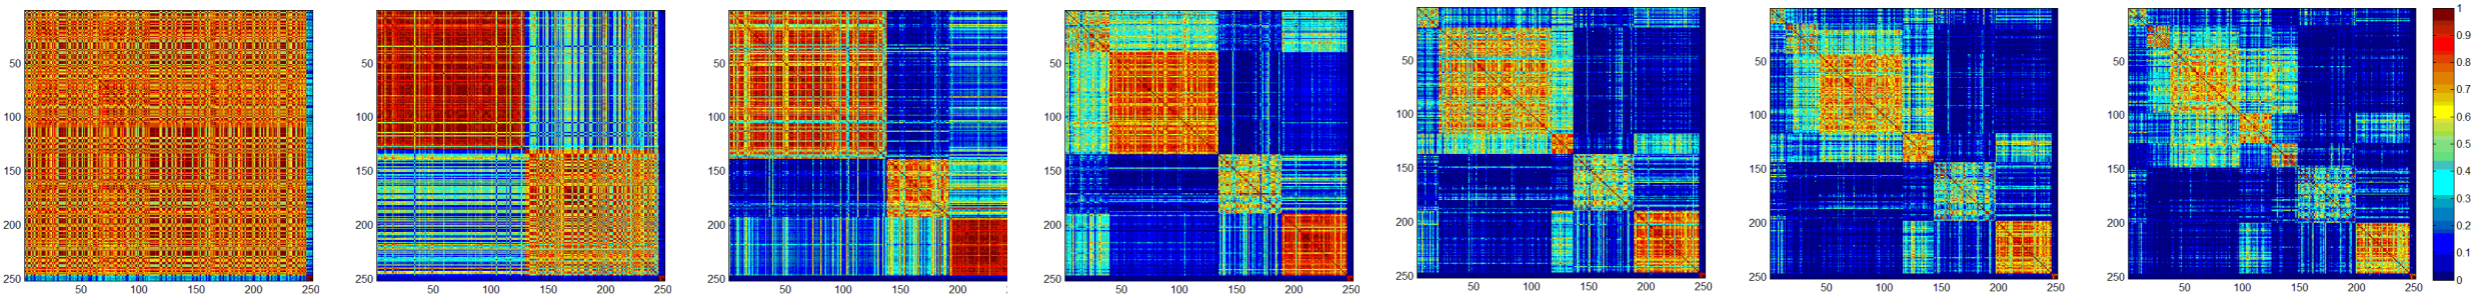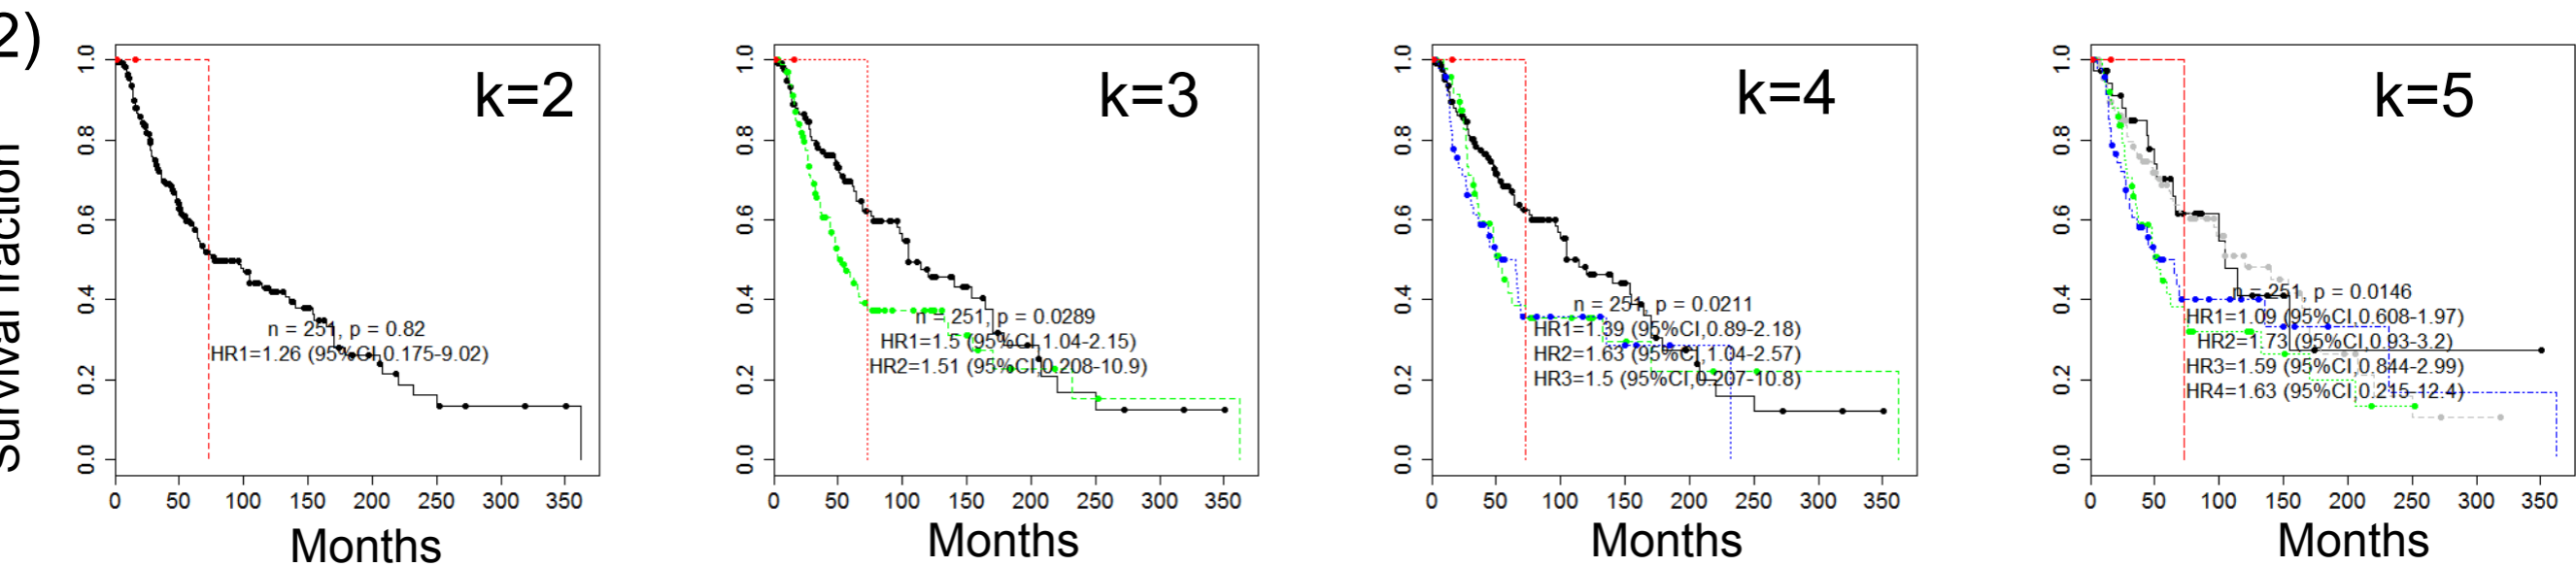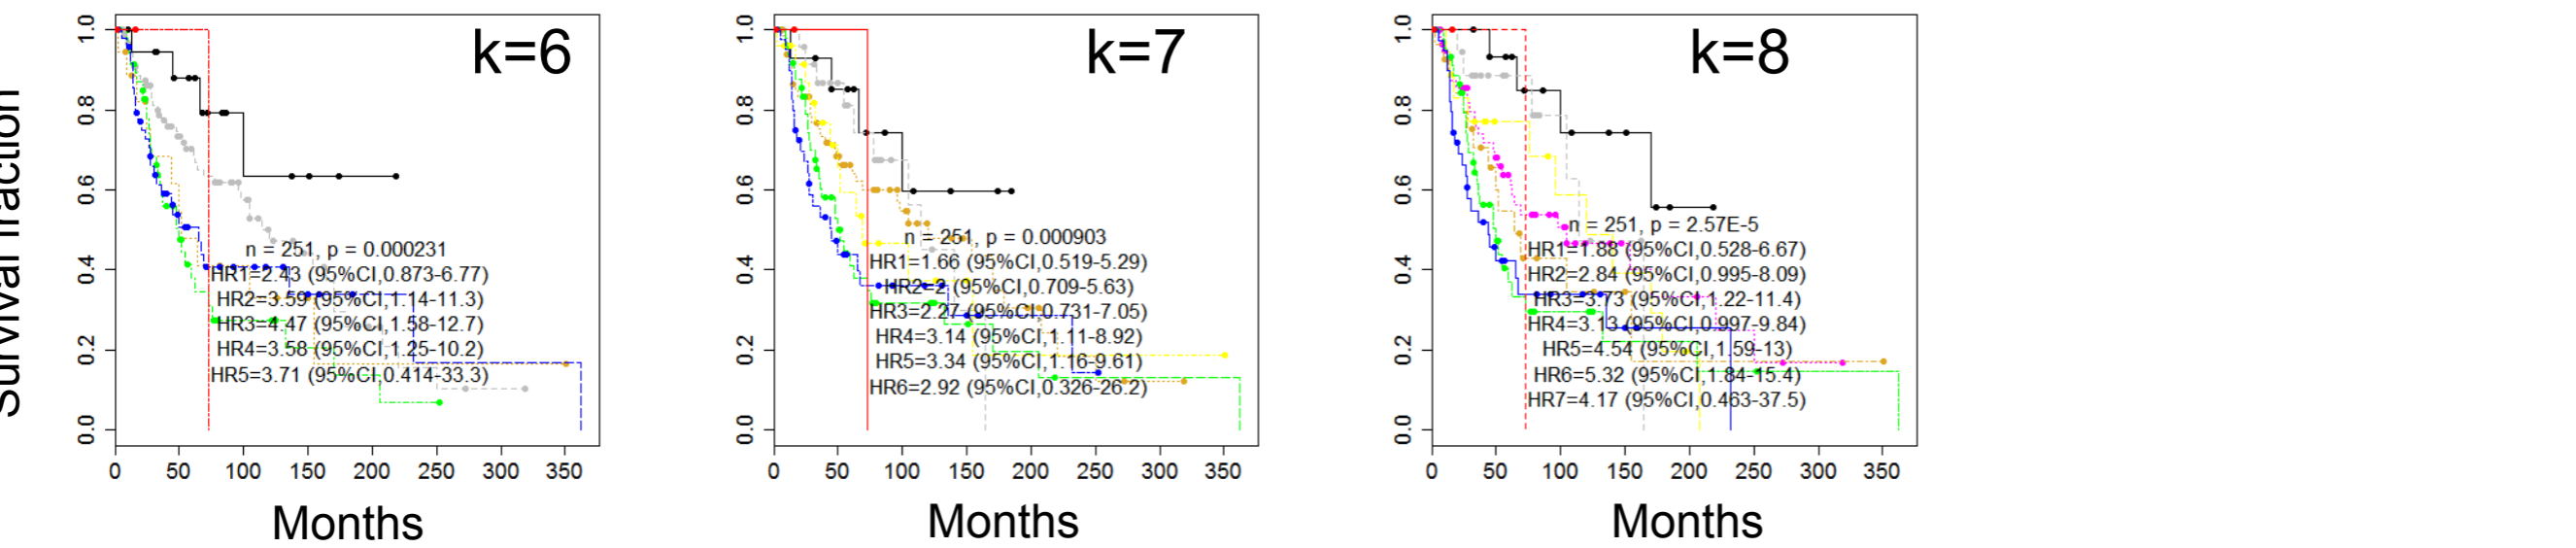

# Supplementary Figure 4

## Independent dataset



# a. UTSW HNSC

1) **k=2**      **k=3**      **k=4**      **k=5**      **k=6**      **k=7**      **k=8**

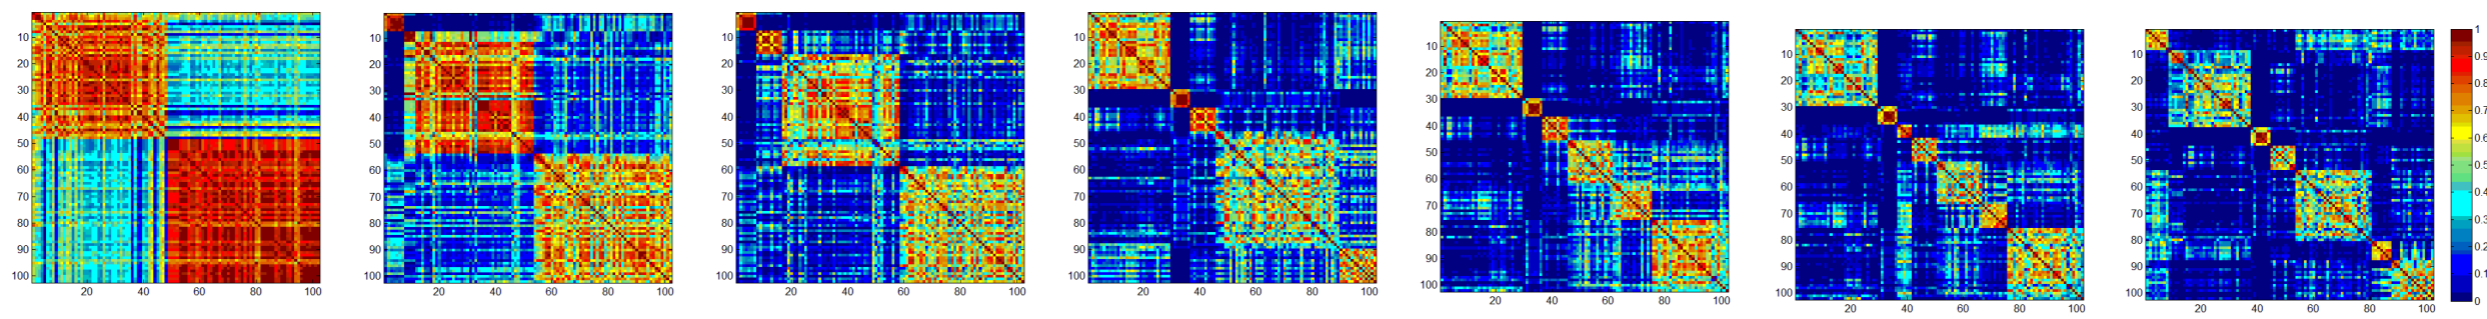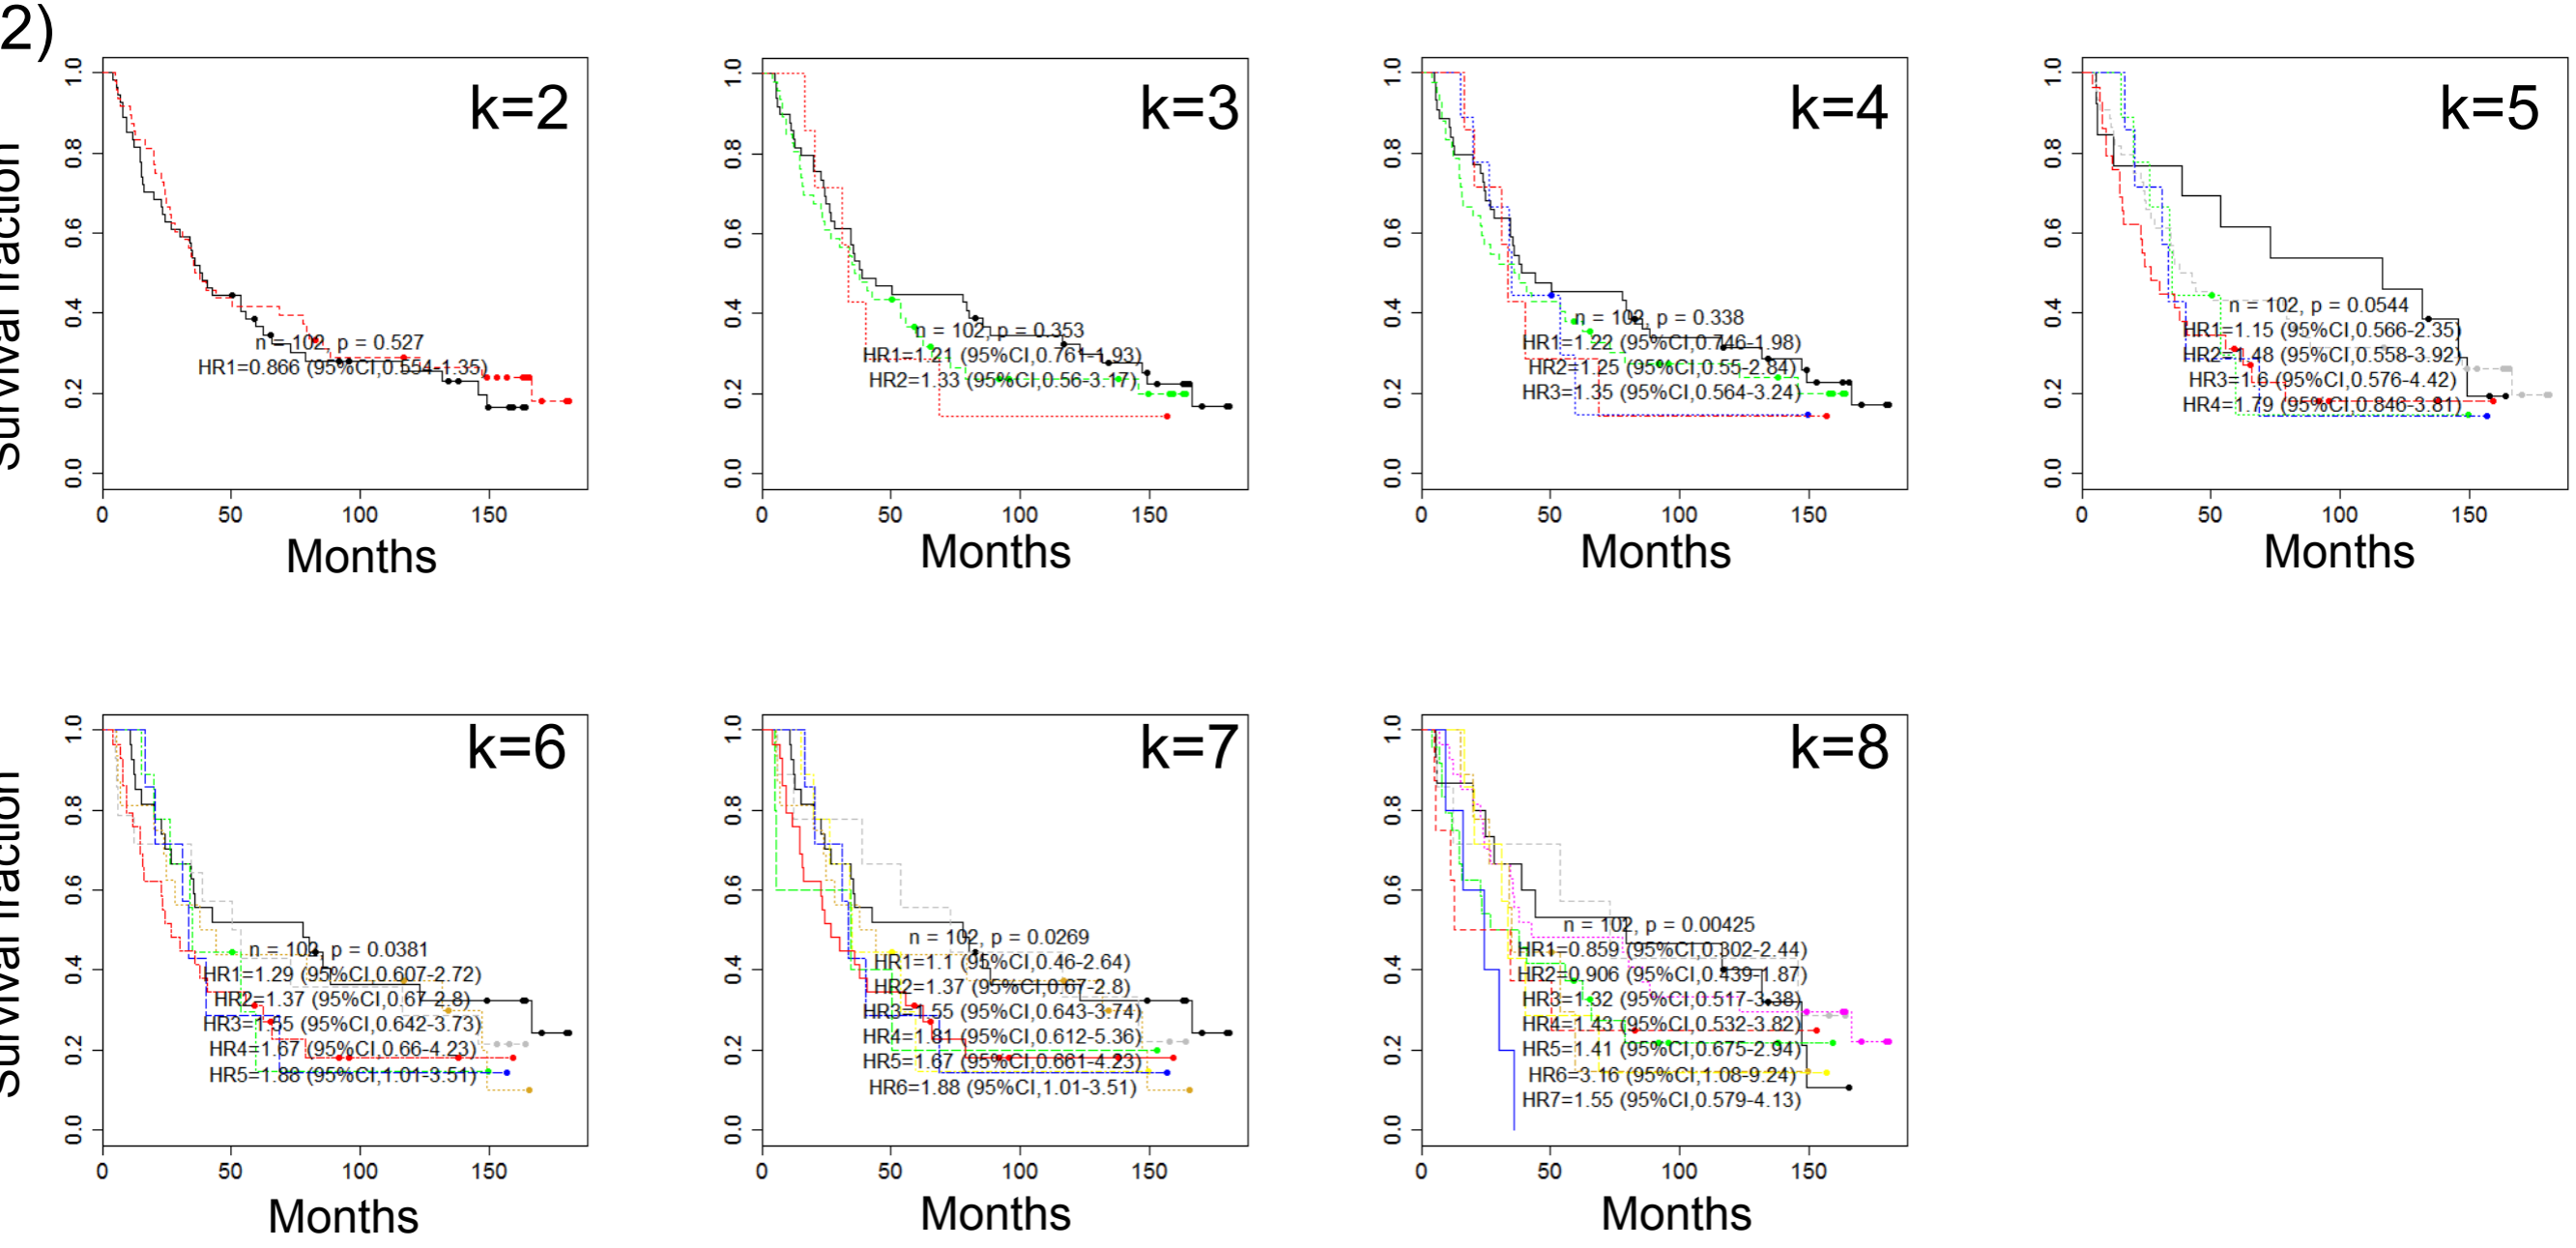

# b. Colon cancer (GSE39582)

a      k=2                      k=3                      k=4                      k=5                      k=6                      k=7                      k=8

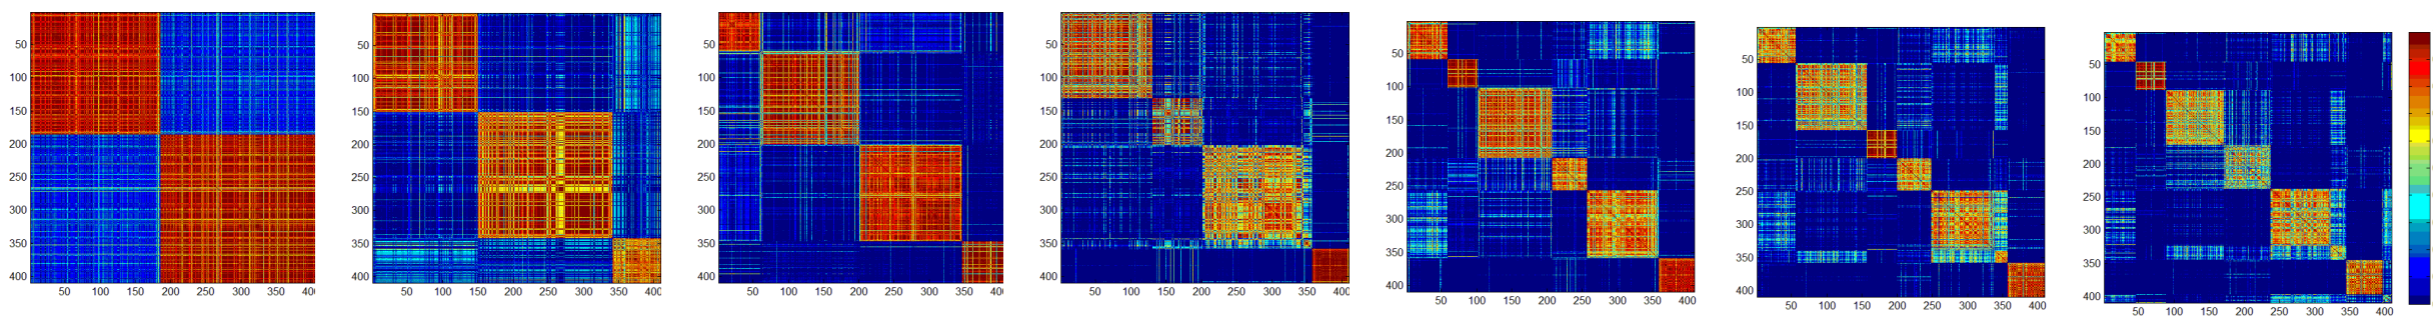

b

Survival fraction

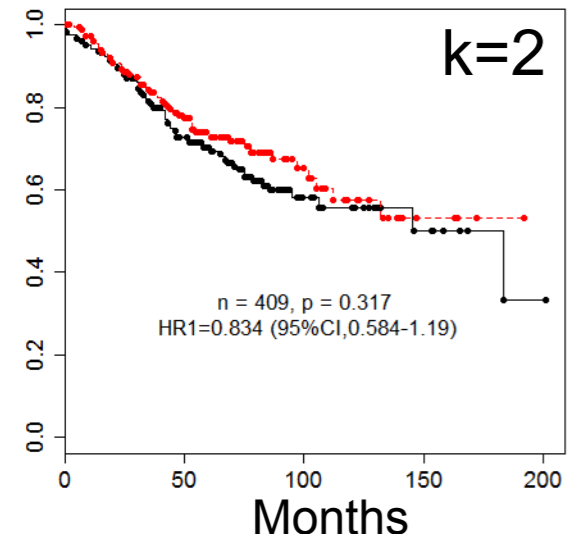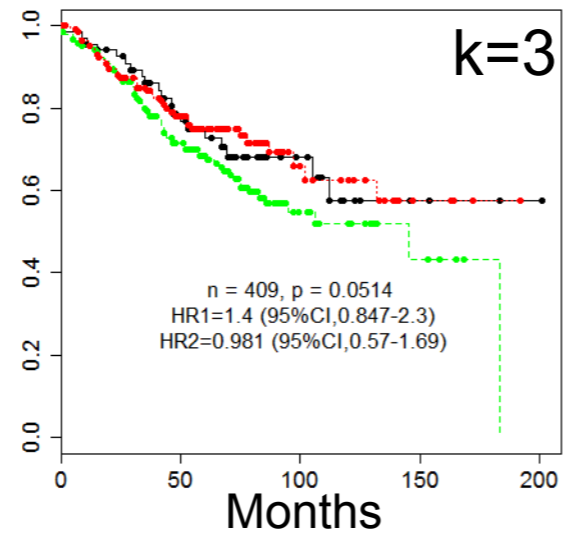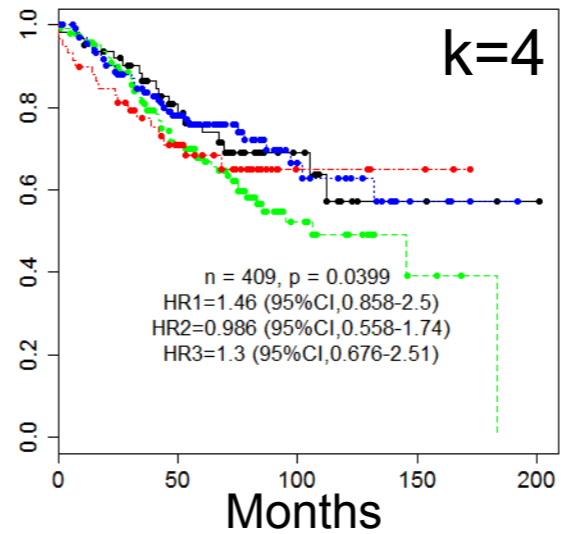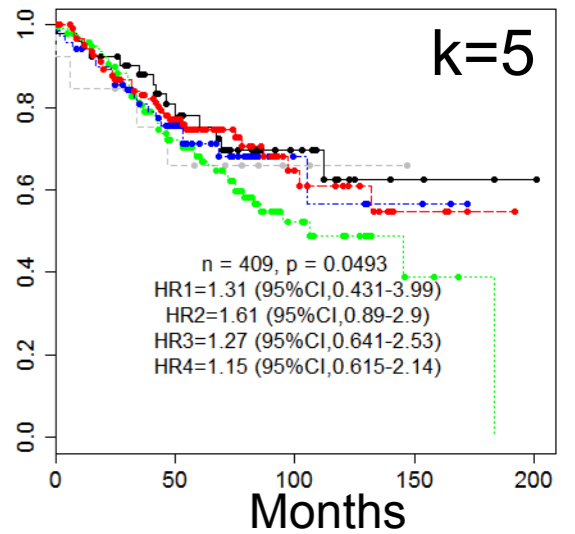

Survival fraction

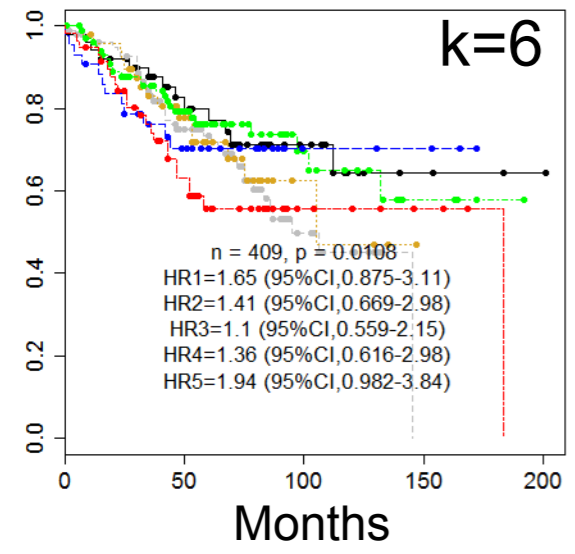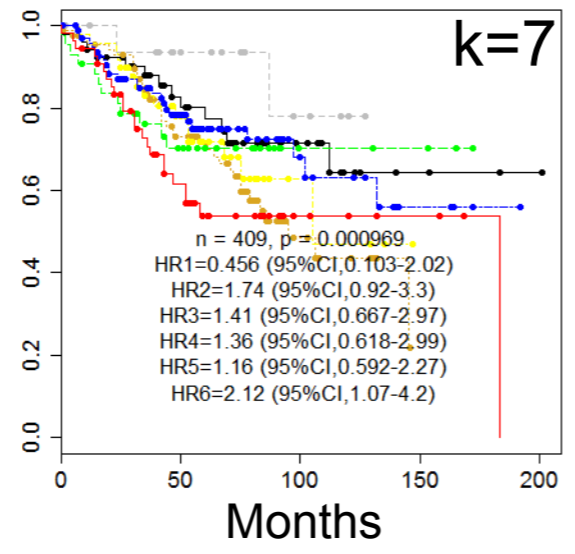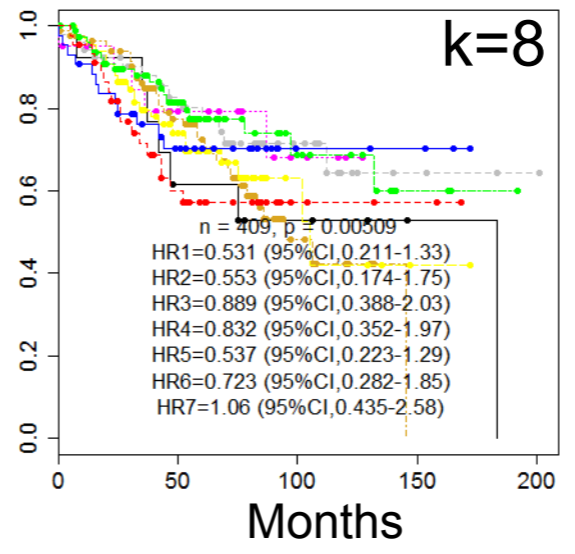

Months

# b. Colon cancer (GSE17538)

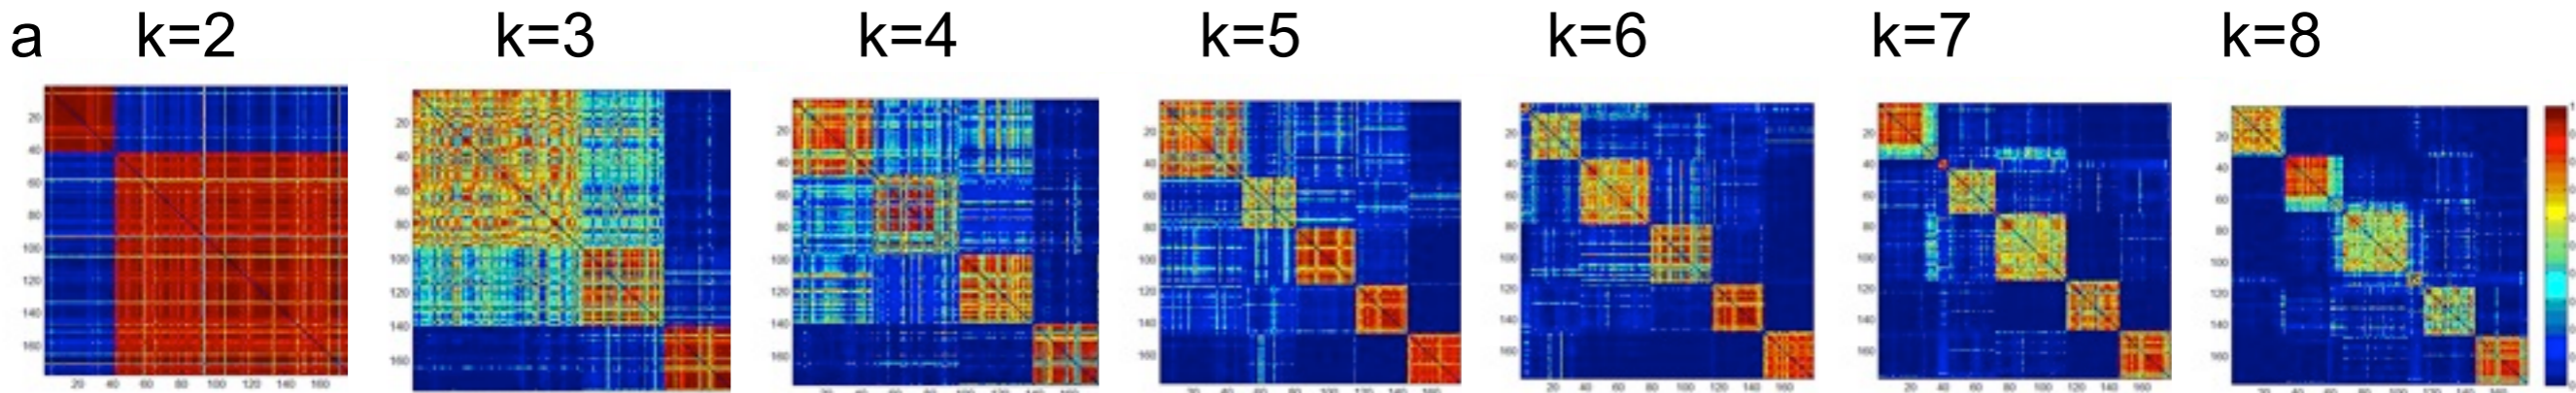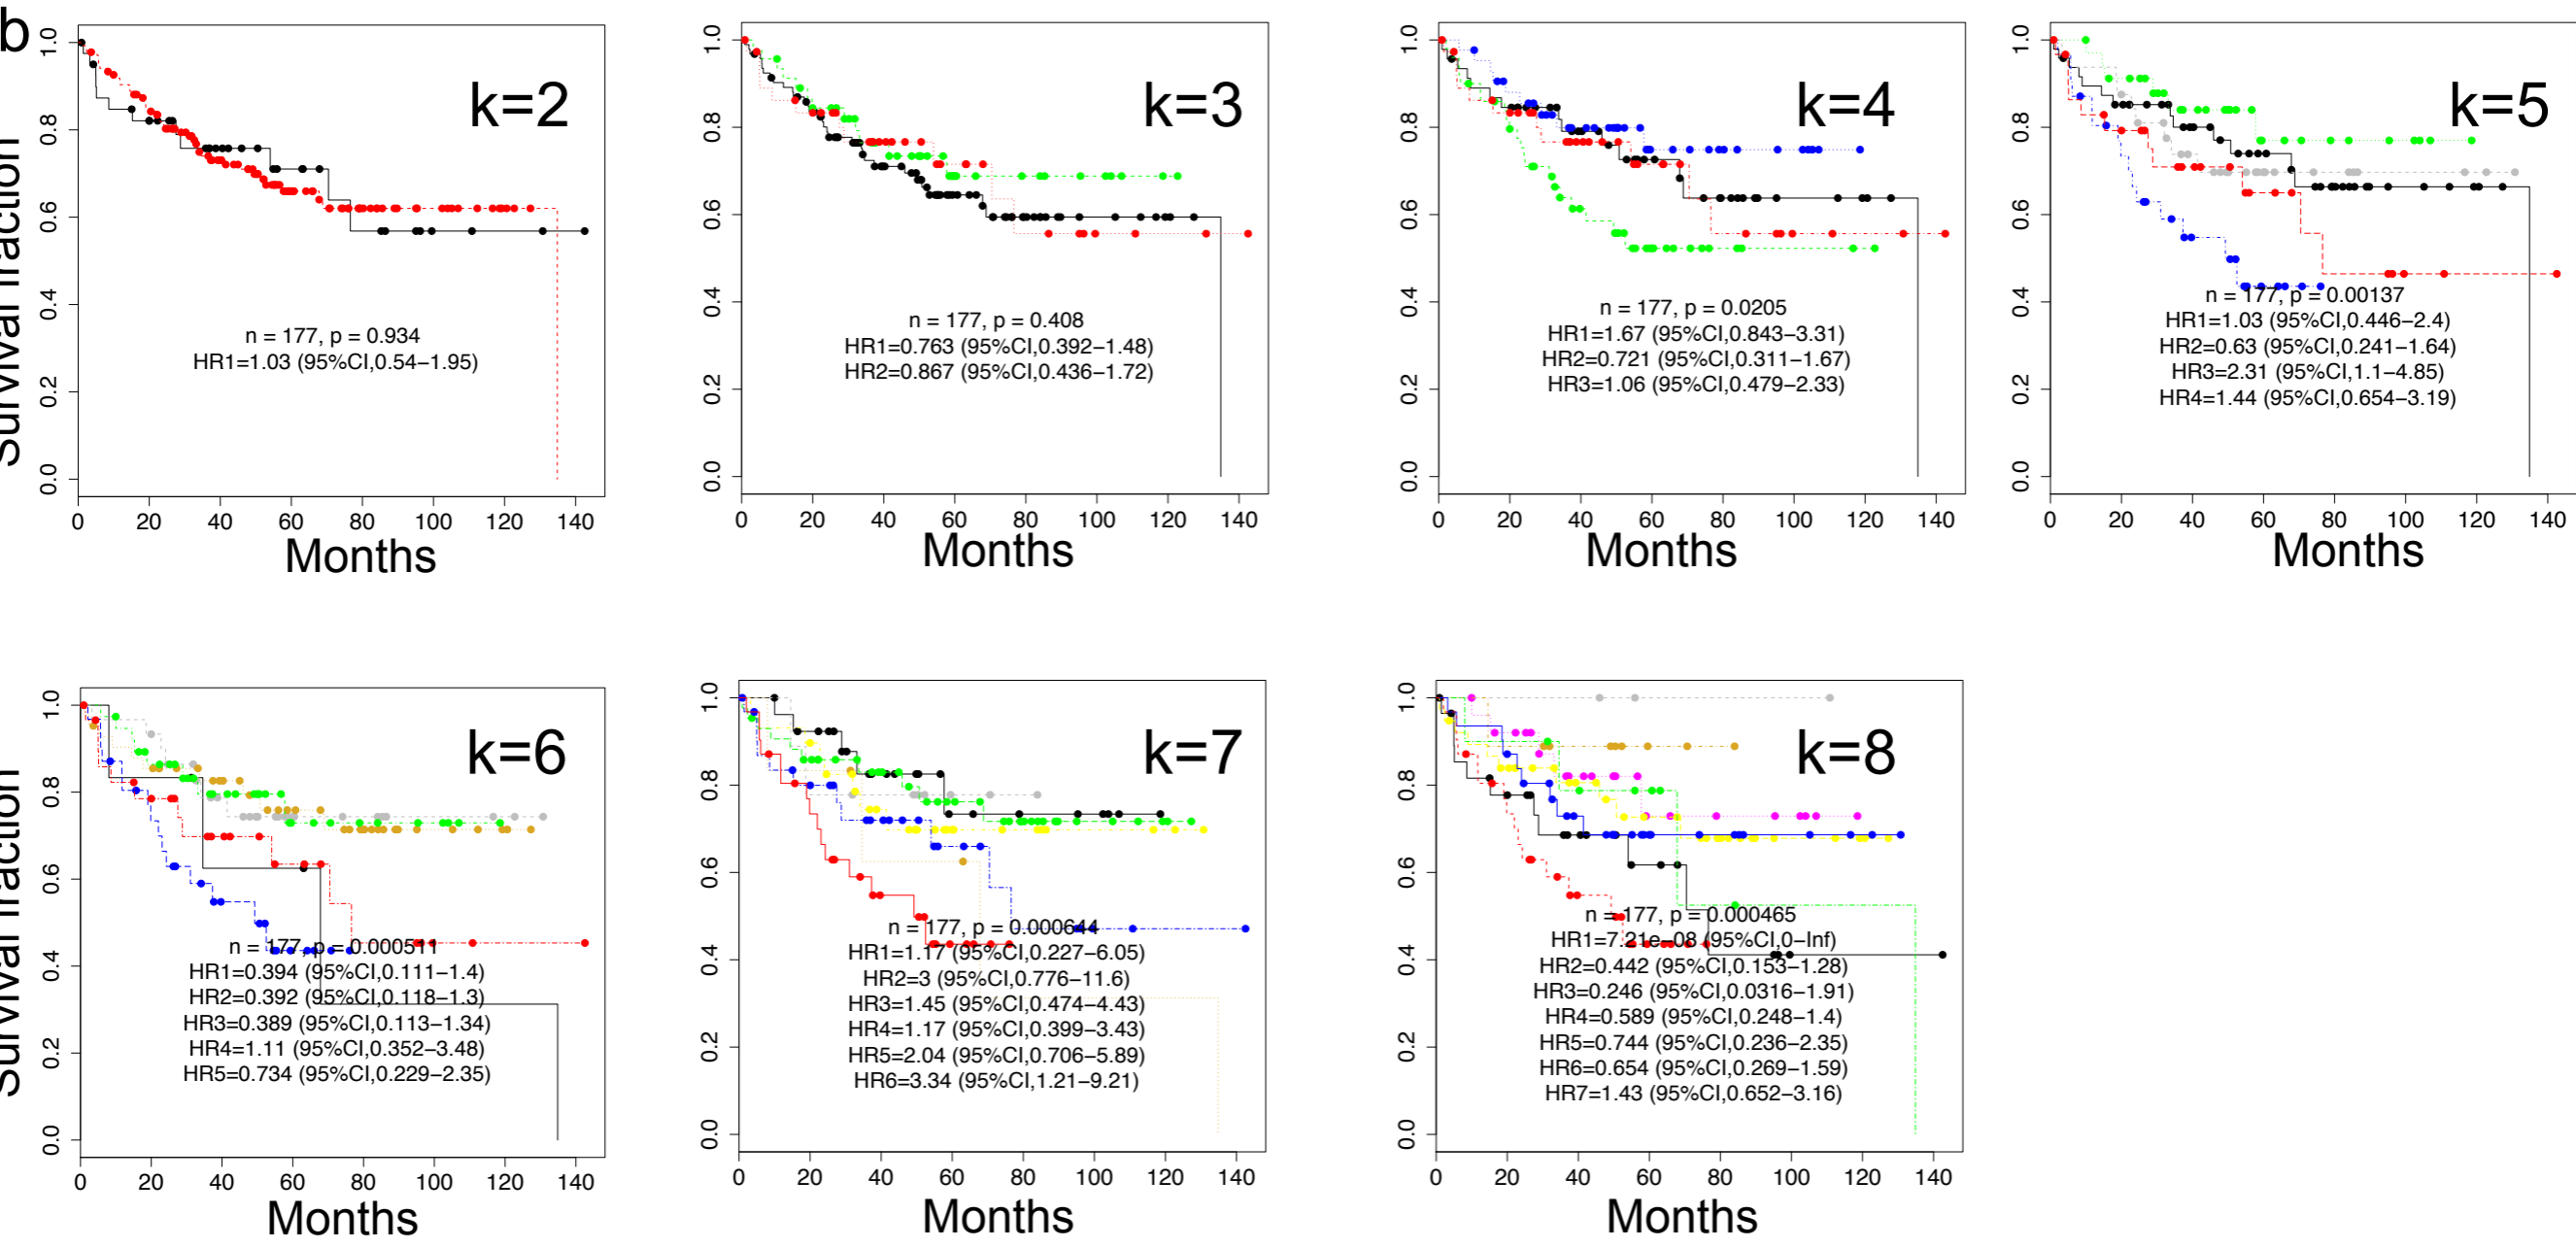

c. OV (Bonome et. al., Cancer Research 2008, )

1) k=2                      k=3                      k=4                      k=5                      k=6                      k=7                      k=8

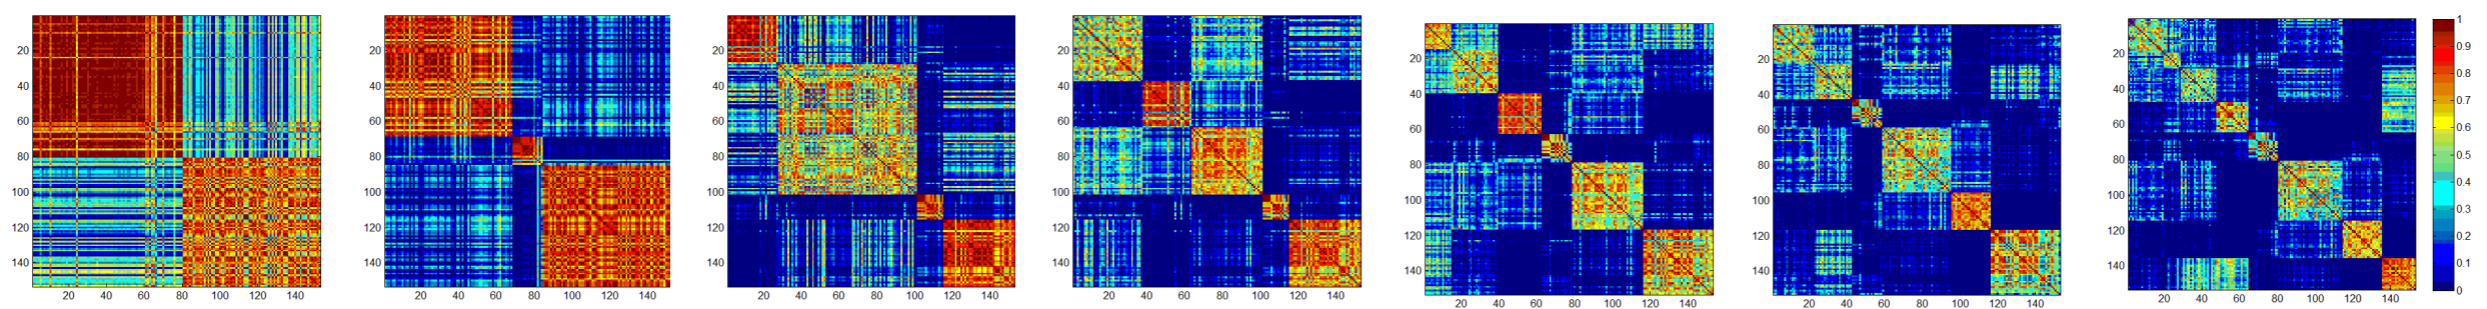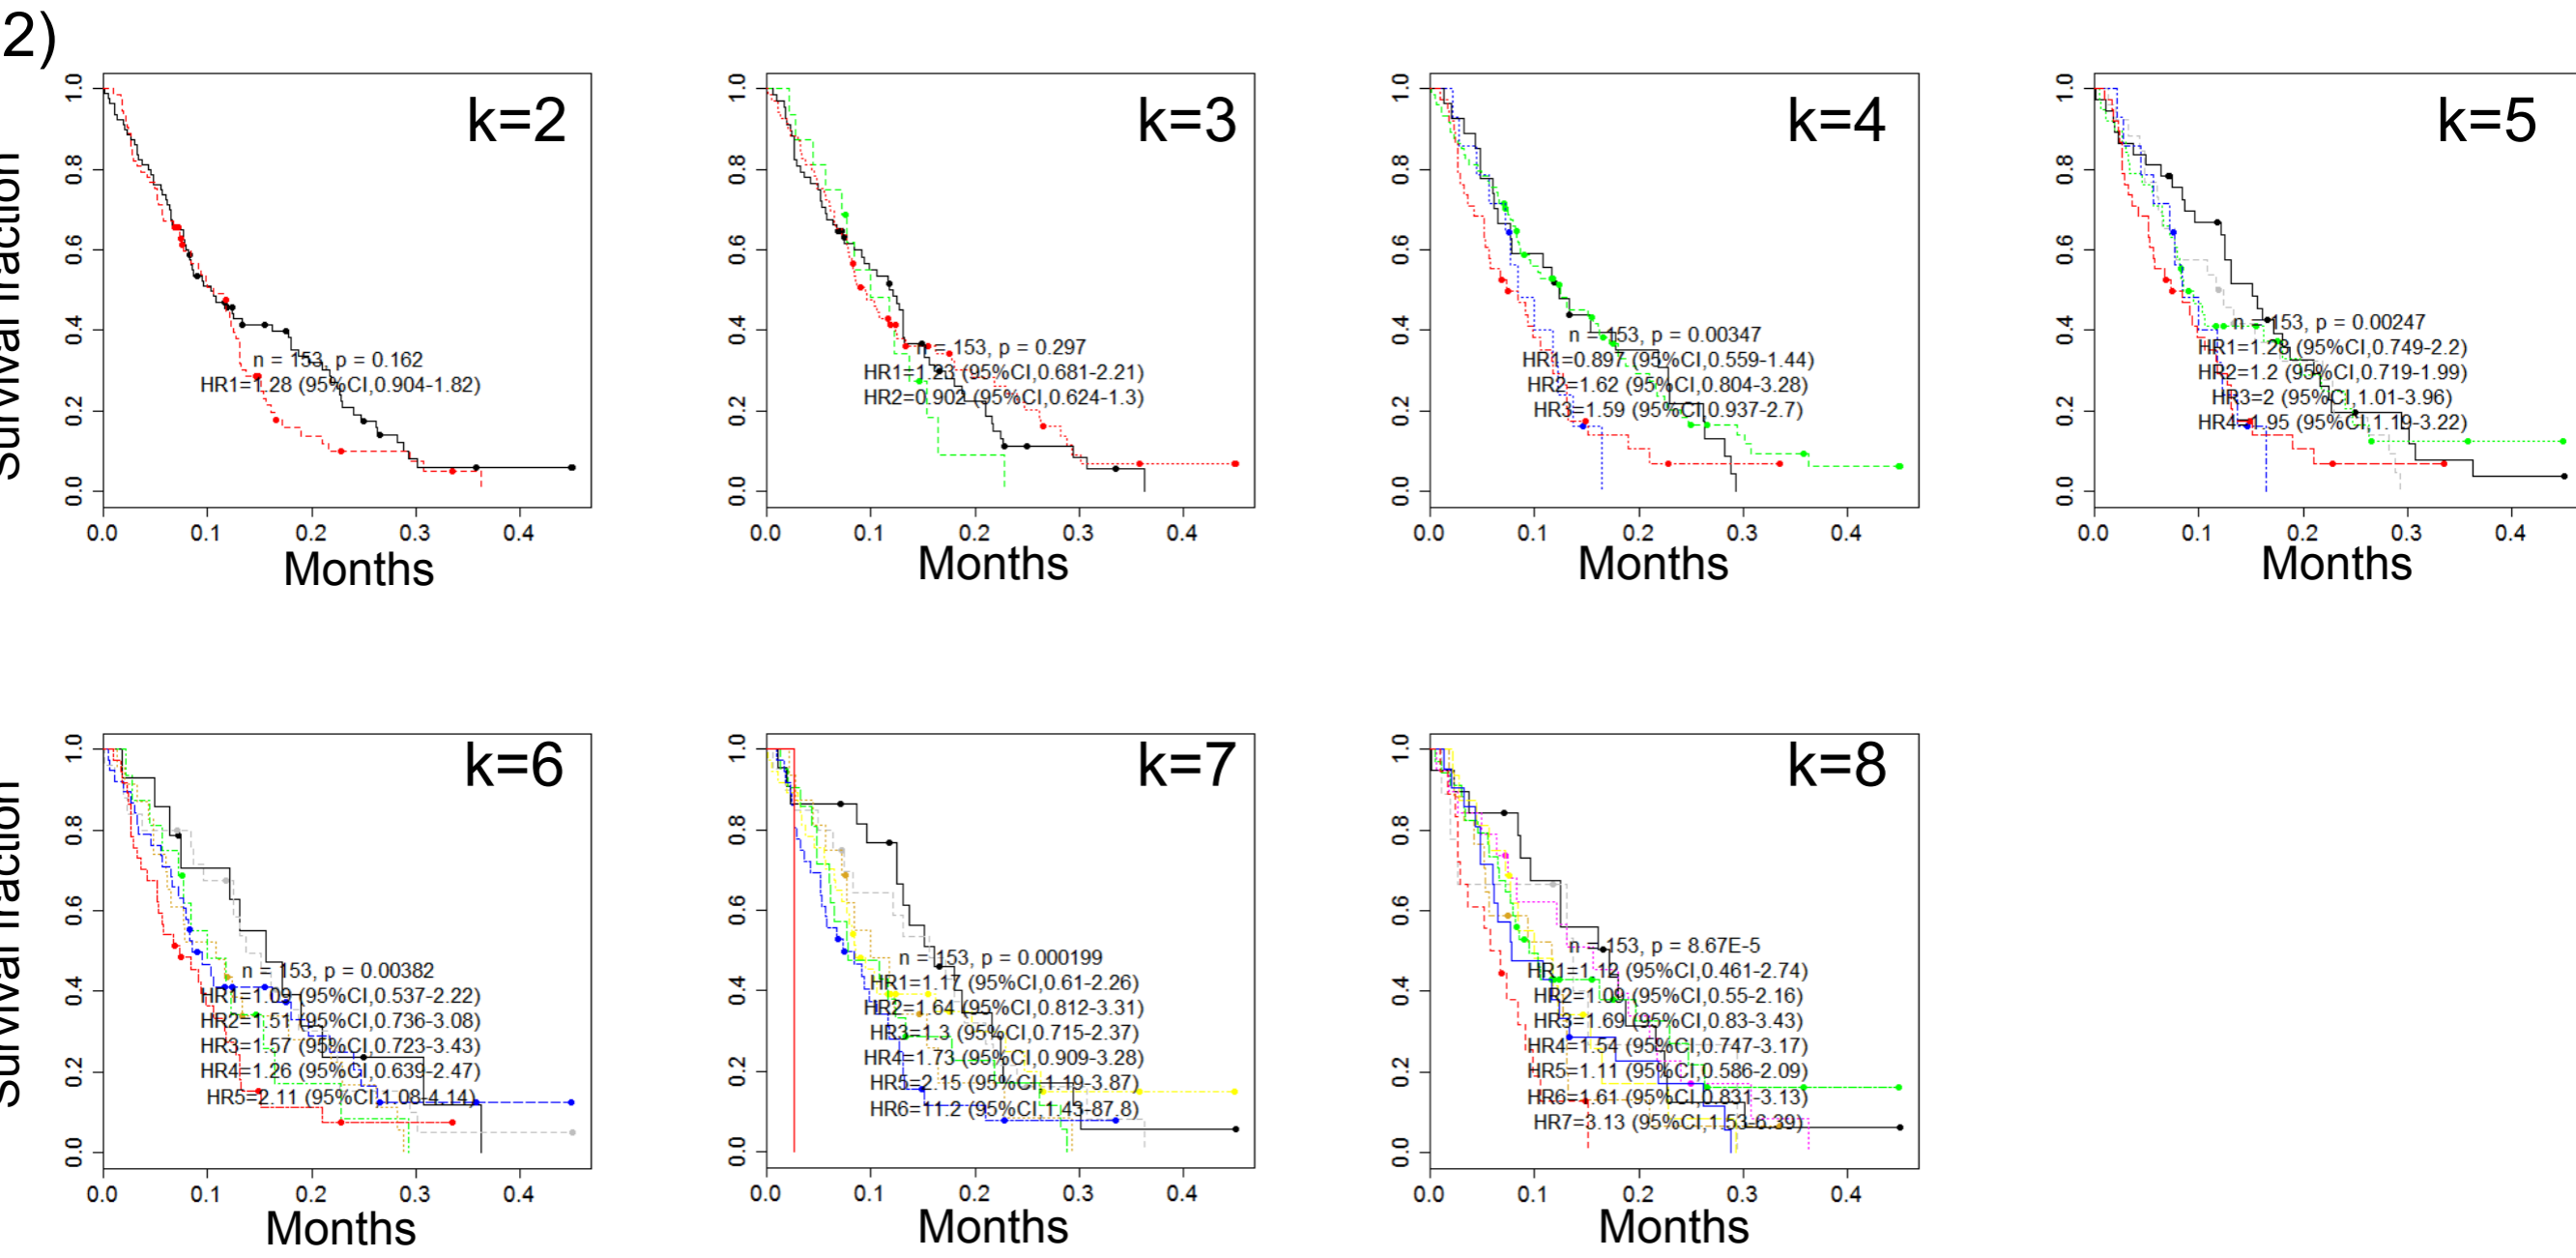

d. OV (Tothill et. al., Clinical Cancer Research, 2008)

1) k=2      k=3      k=4      k=5      k=6      k=7      k=8

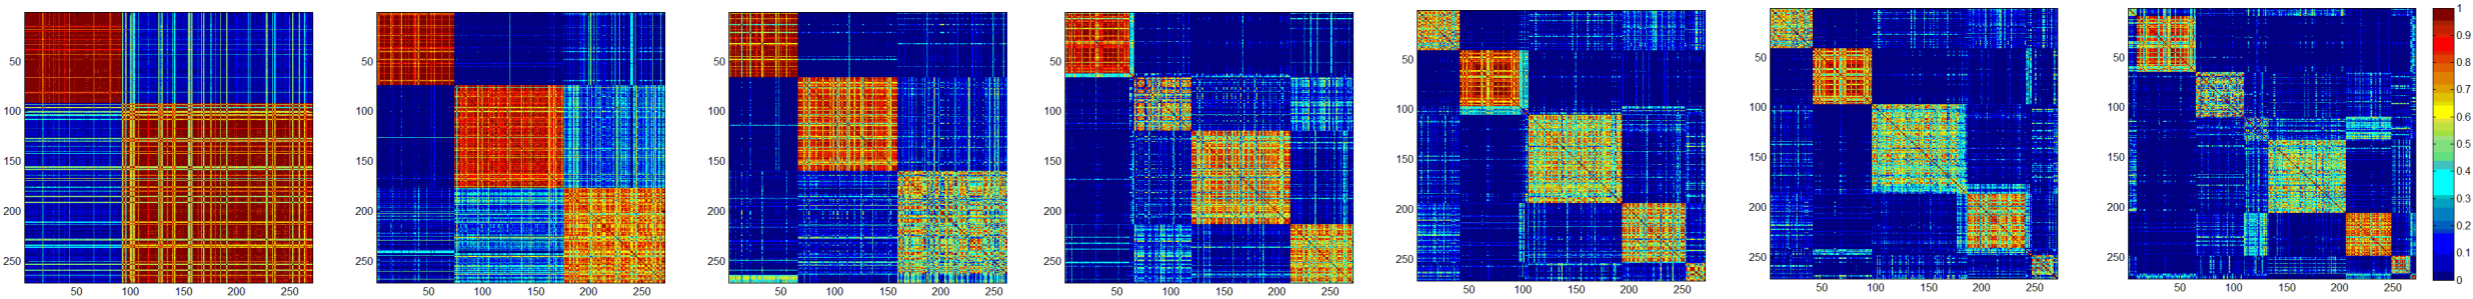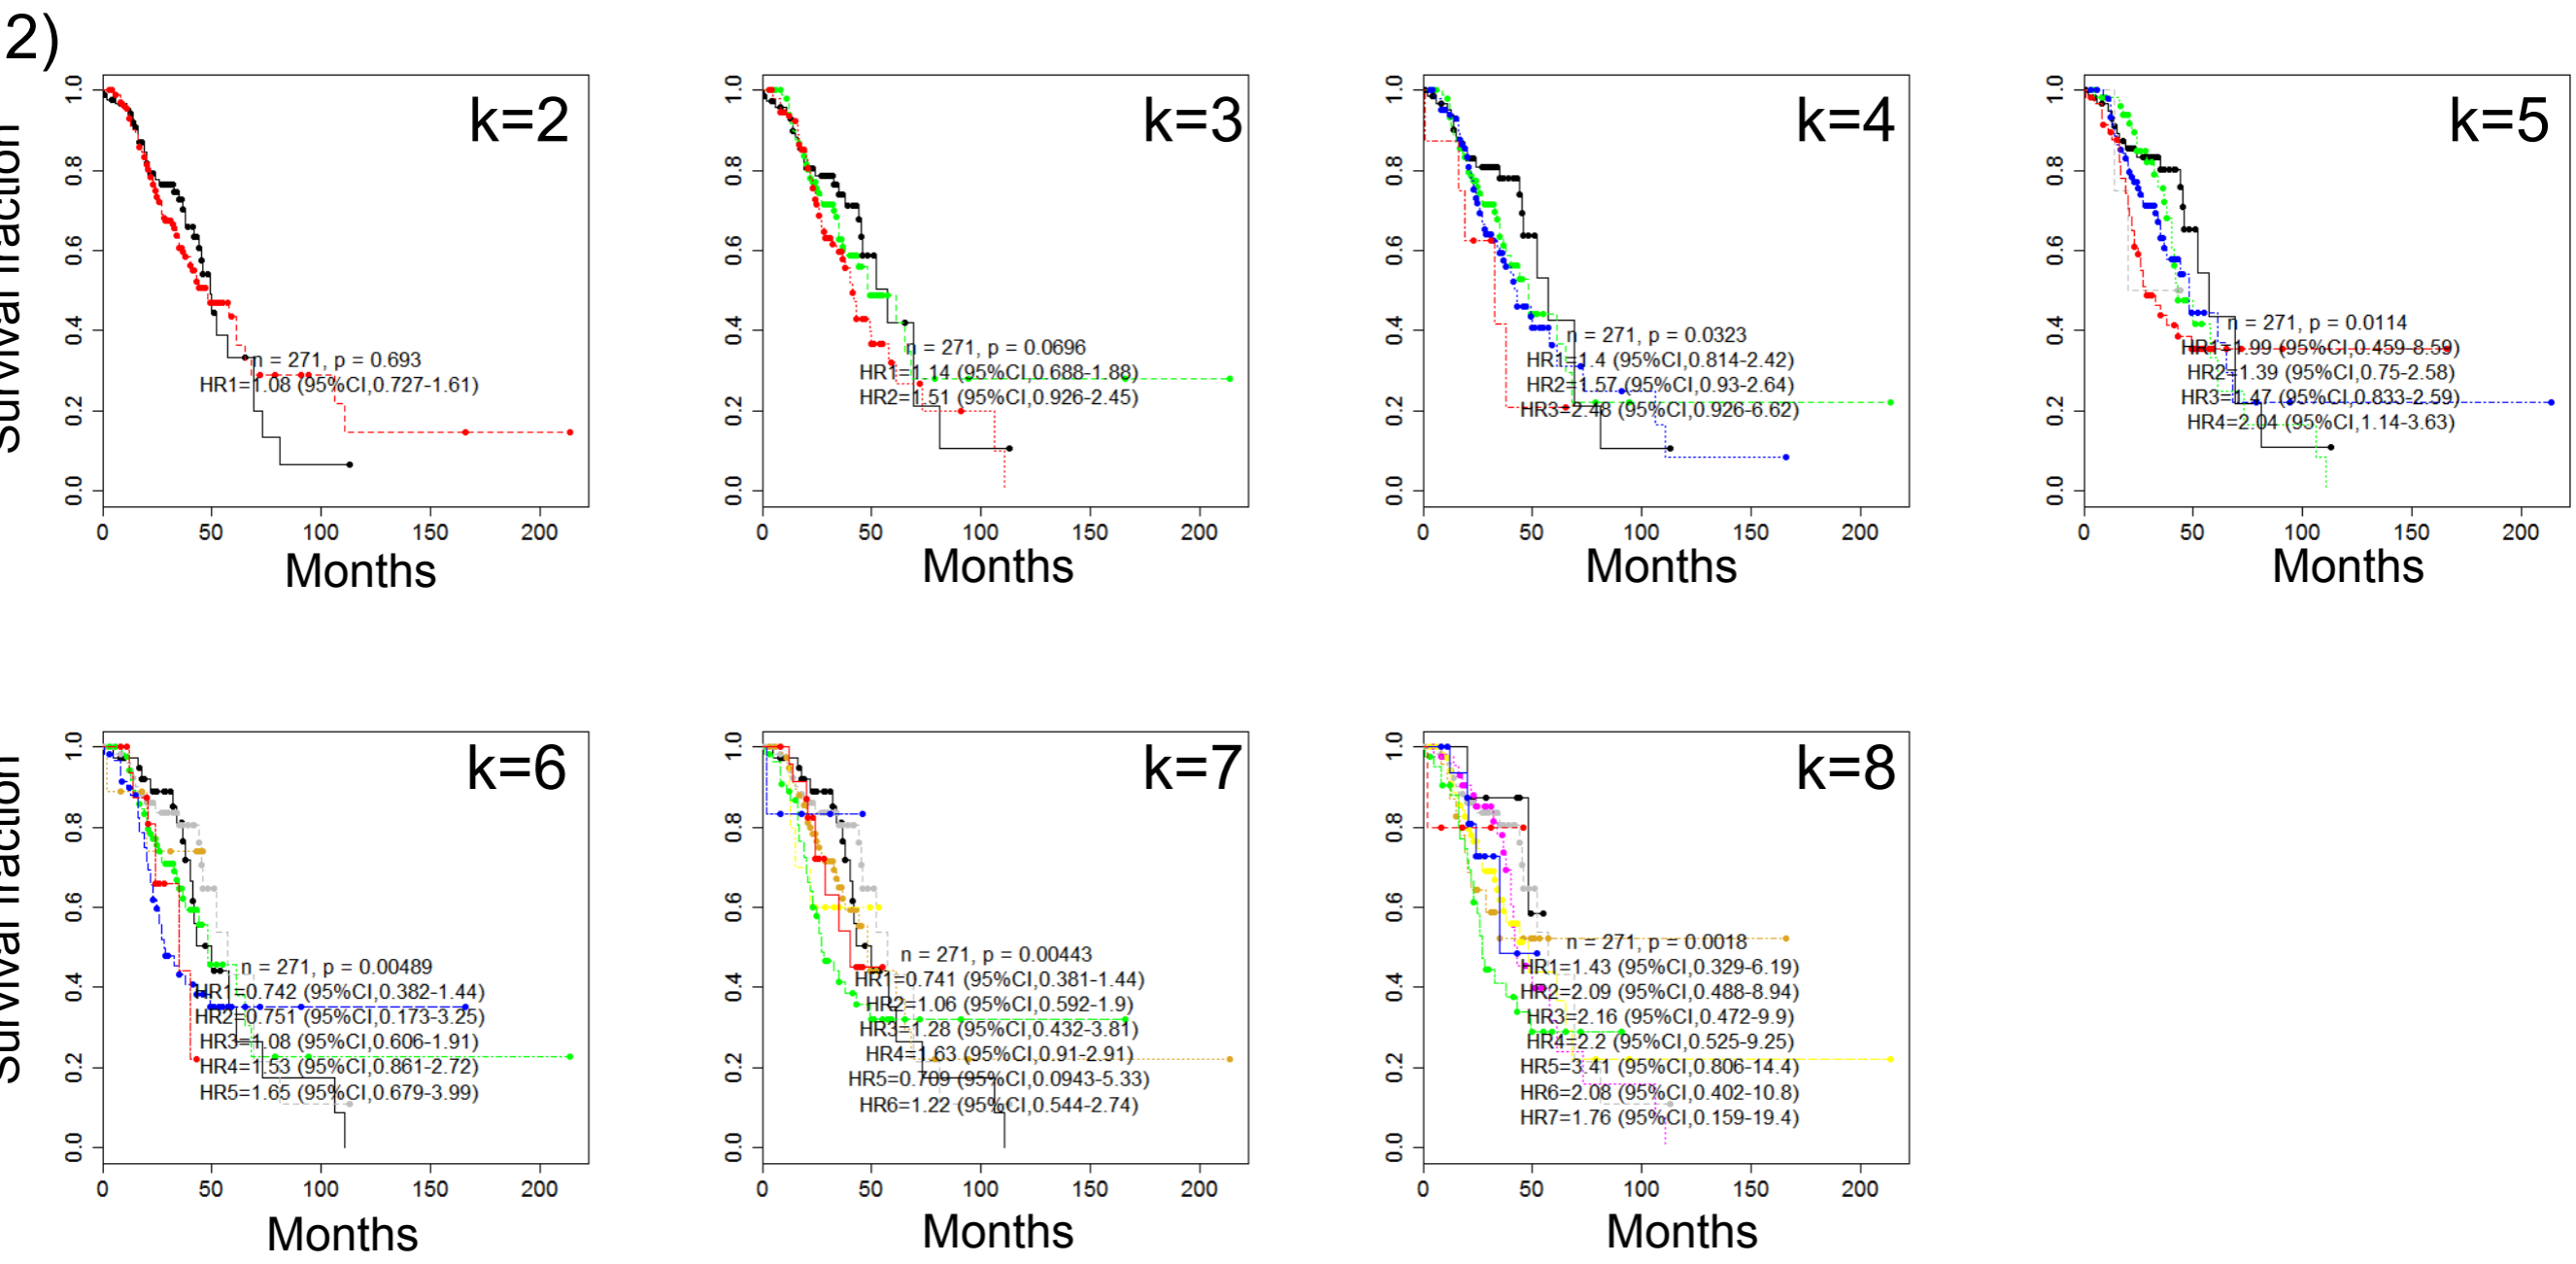

e. Lung adenocarcinoma (Shedden et. al., Nature Methods, 2008)

1) k=2      k=3      k=4      k=5      k=6      k=7      k=8

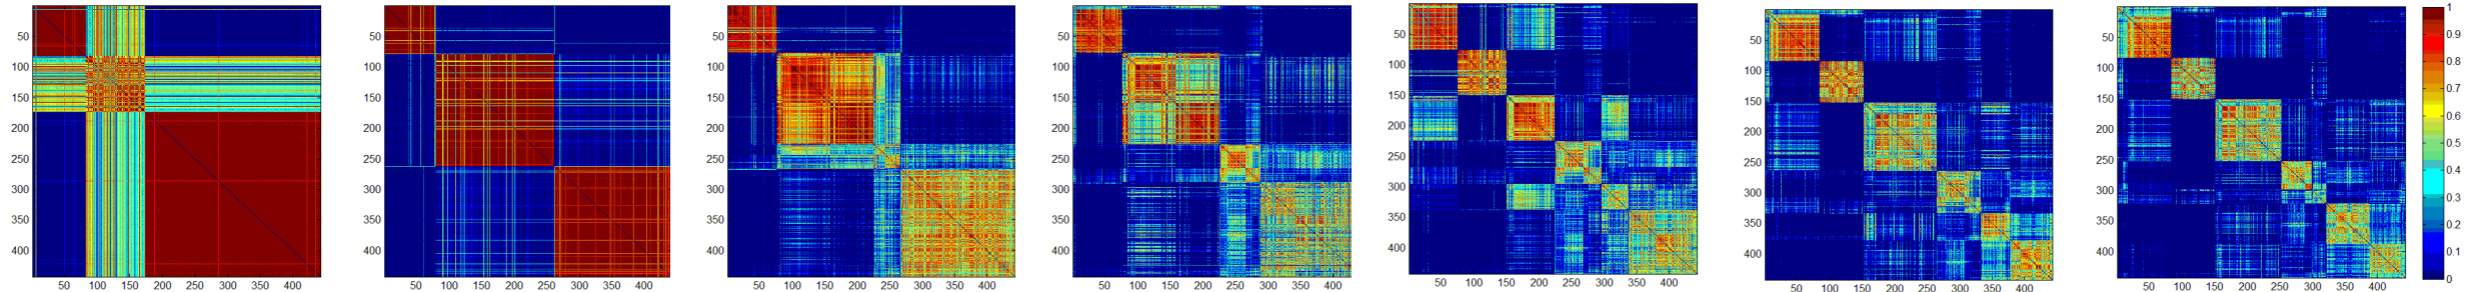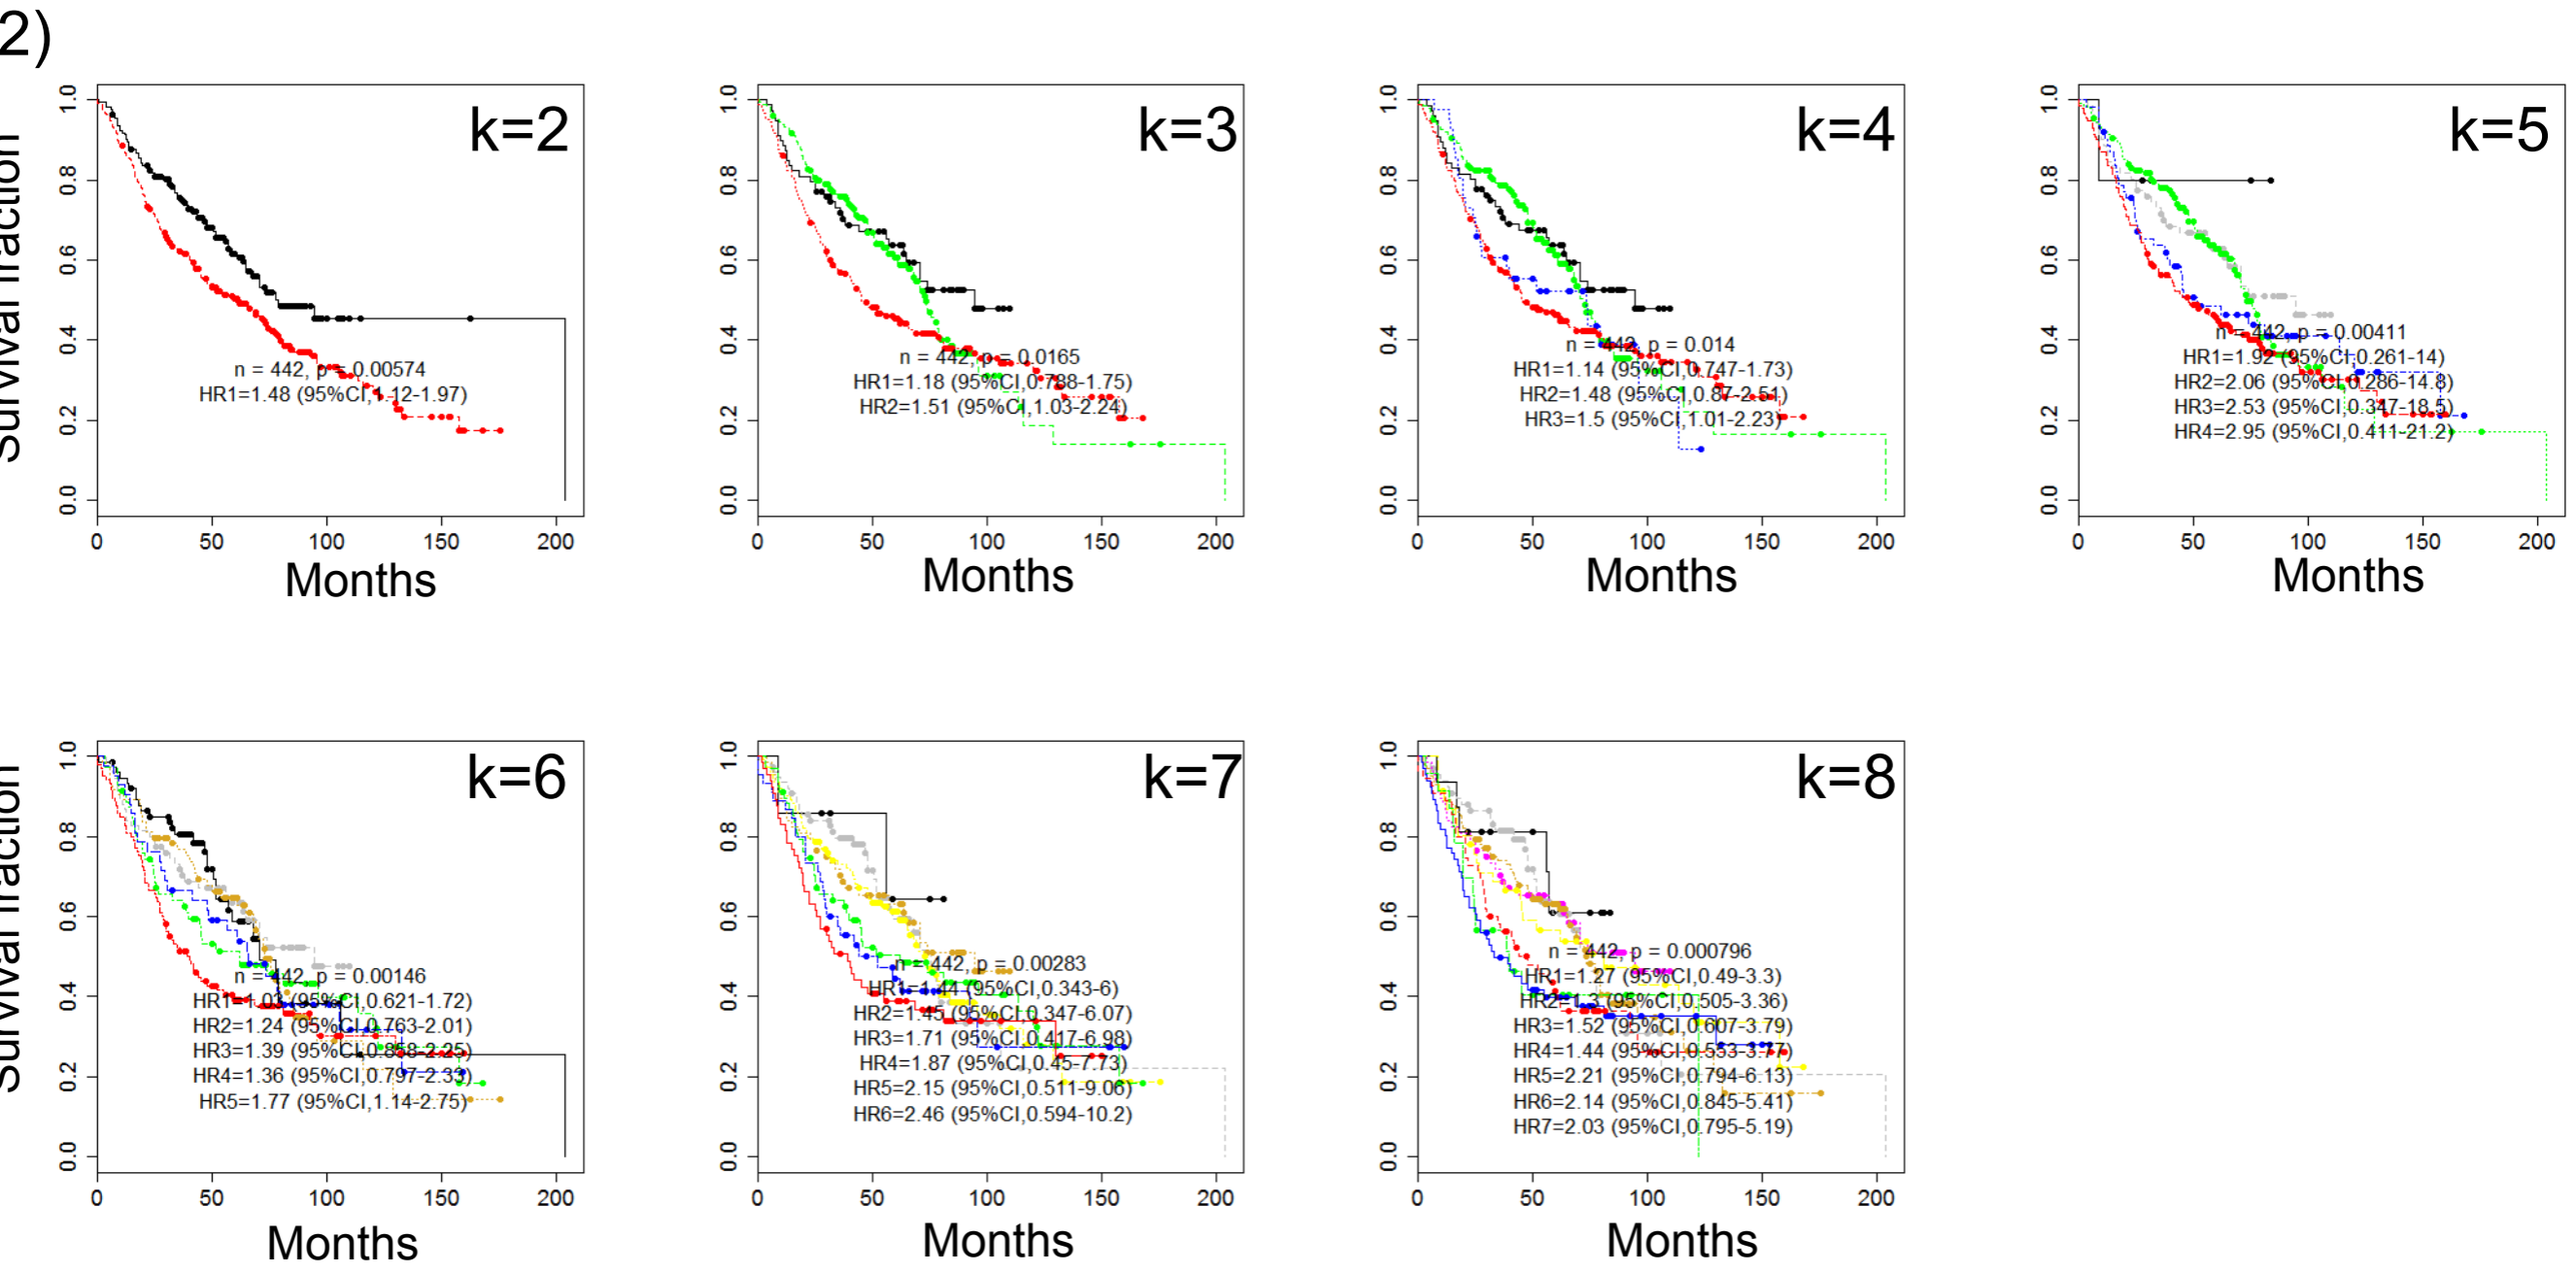

# Supplementary Figure 5

## Single gene analysis

# a. TCGA BLCA

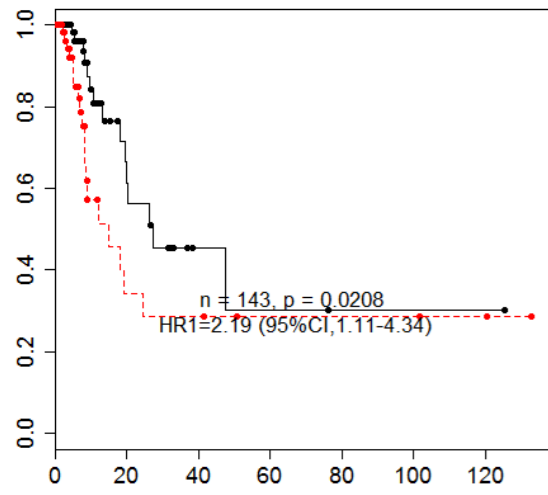

TP53

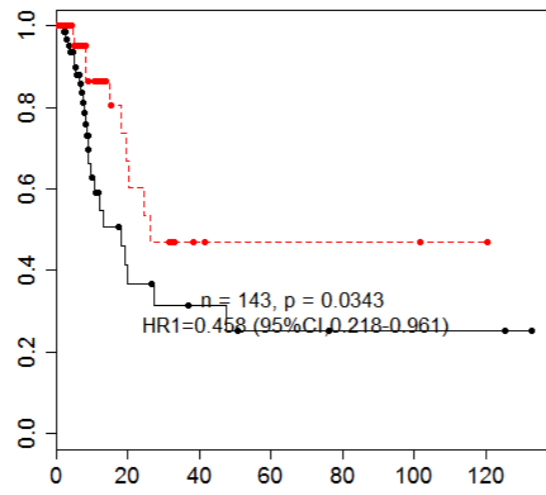

ASCC2

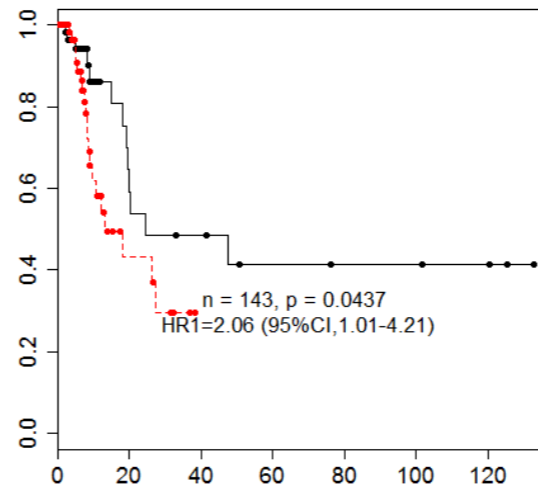

WRN

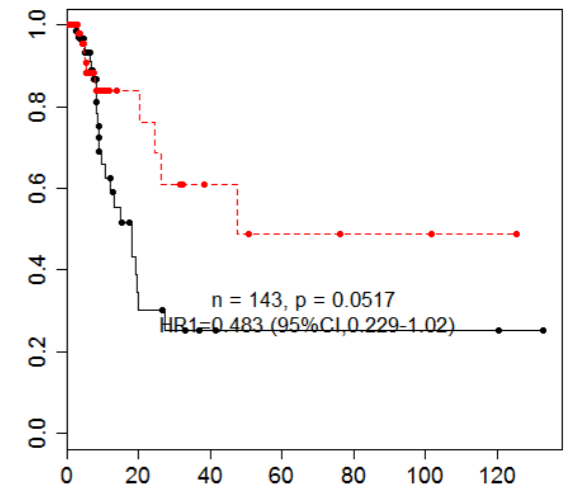

FHL2

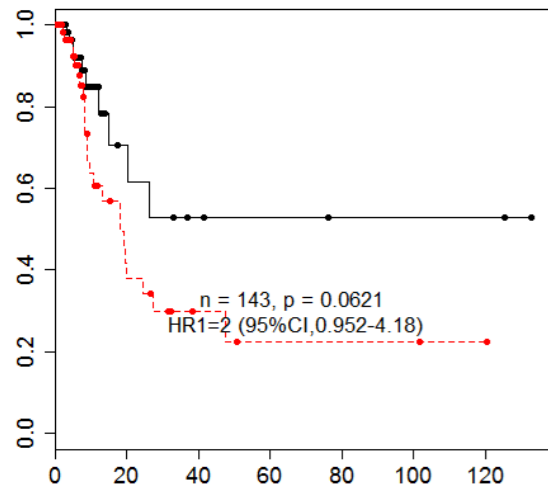

NCOA6

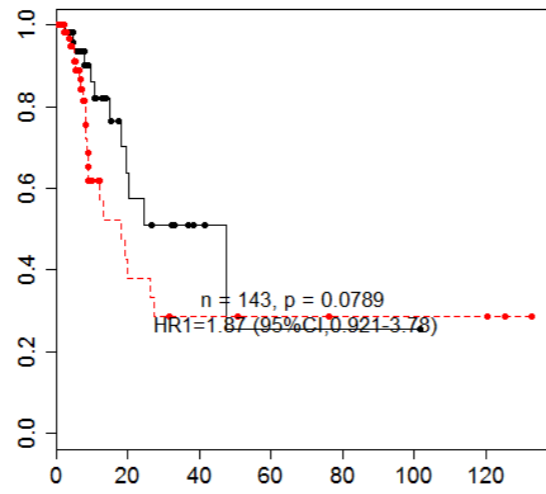

MSH6



## b. TCGA BRCA

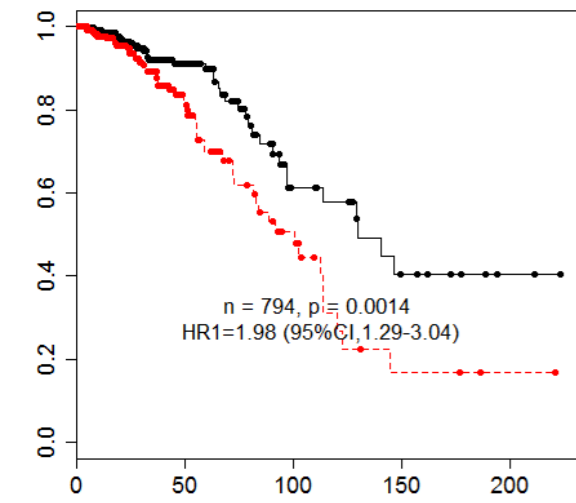

ZHX1

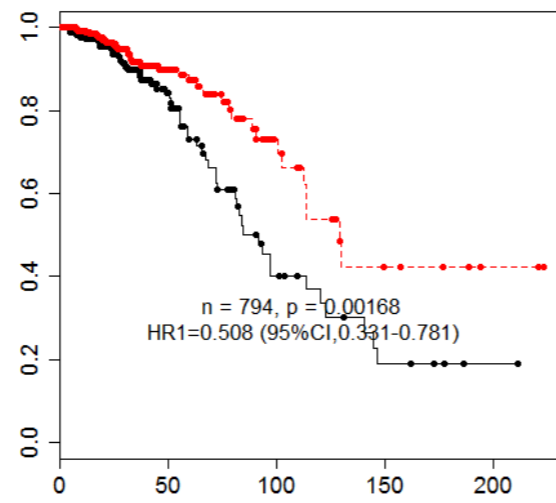

NFKBIA

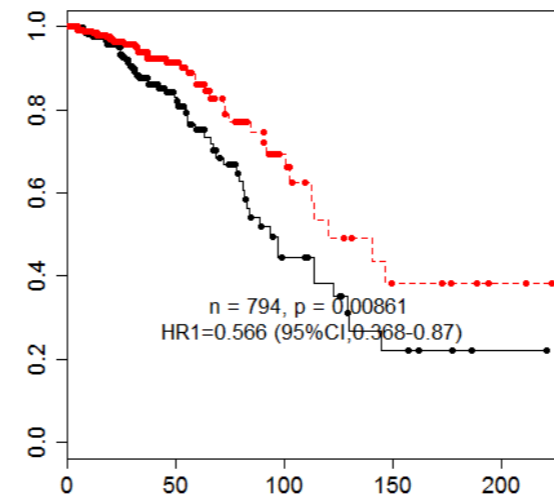

ACTA2

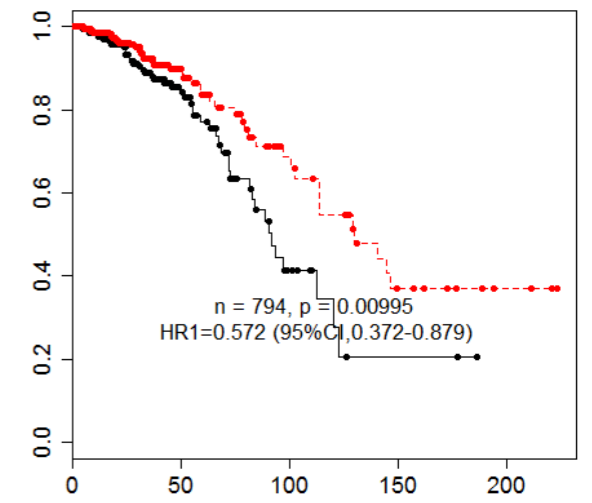

PIN1

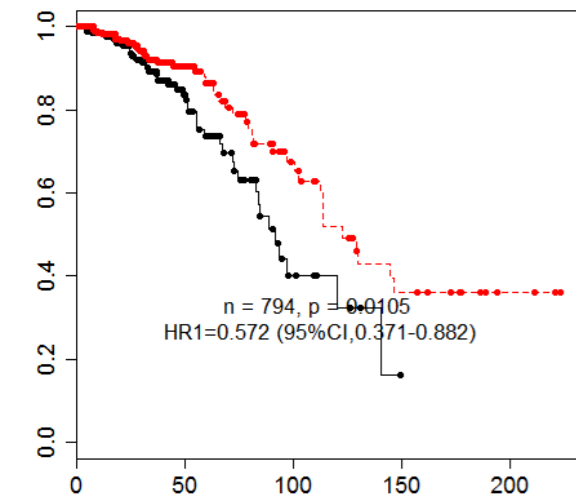

THAP8

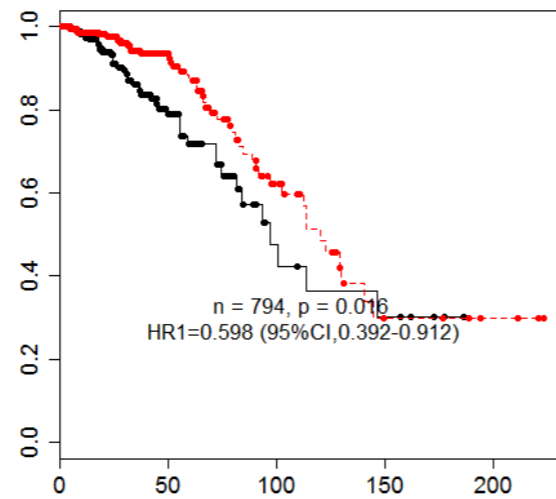

NAT6

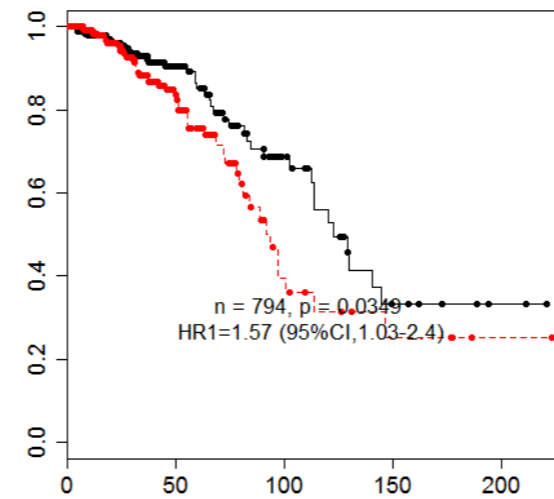

BRCA2

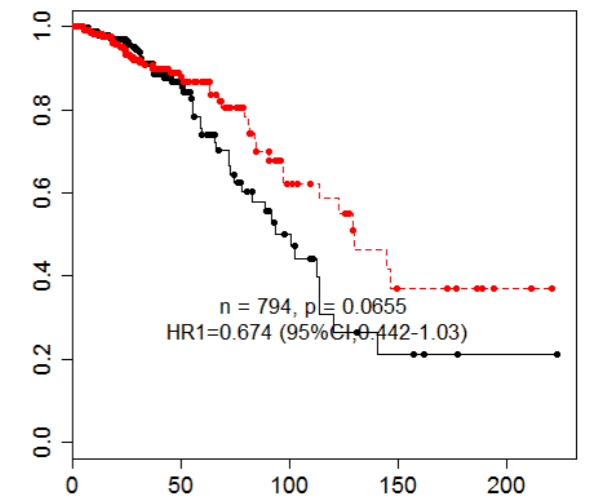

CDK5

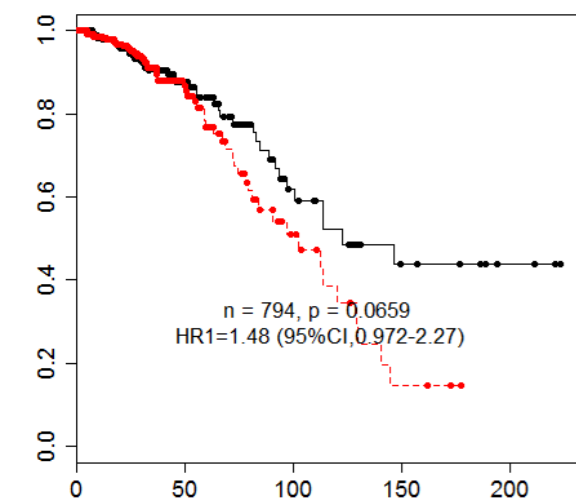

CHD3

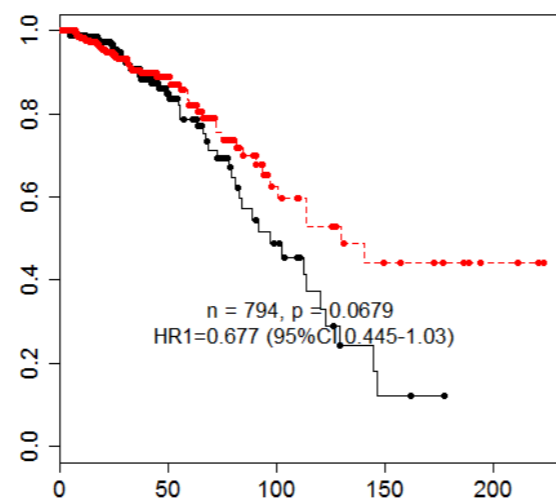

YBX1

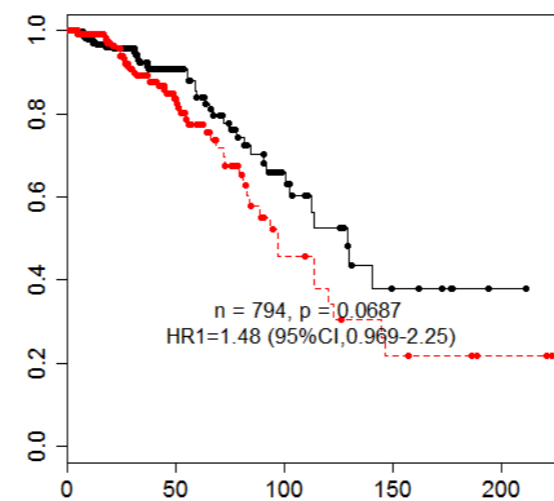

TDRD7

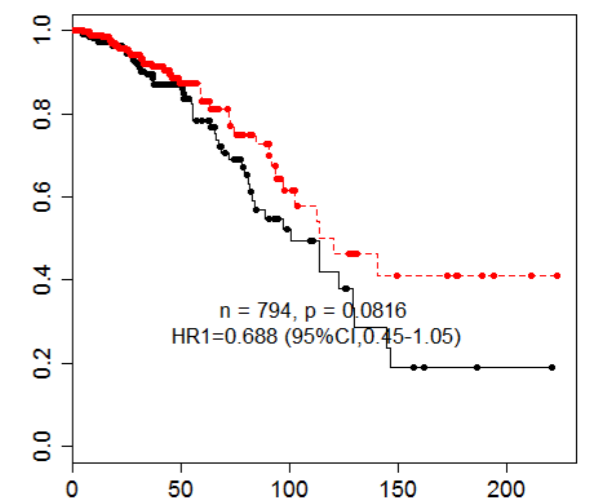

VIM

# c. TCGA GBM

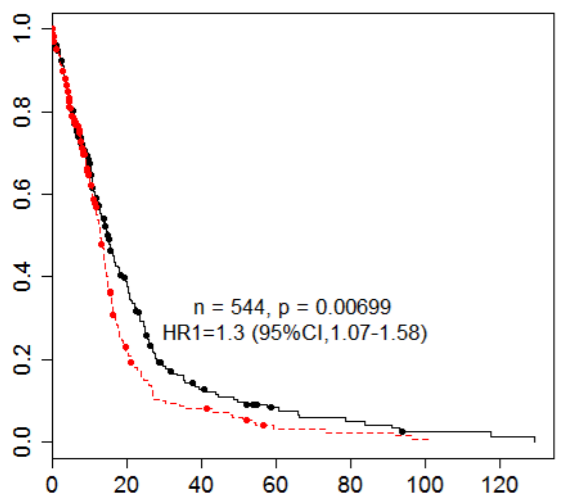

TEP1

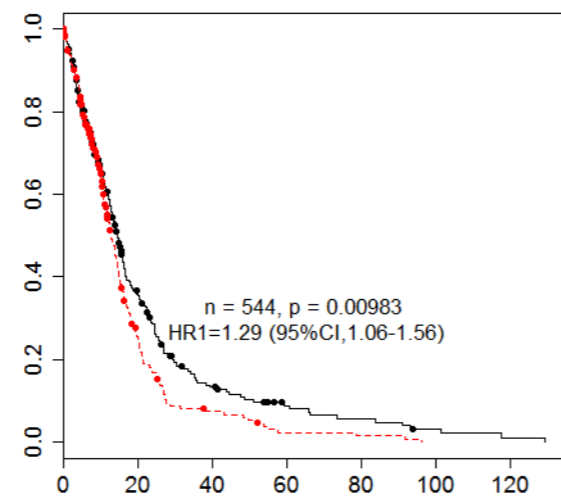

PTRF

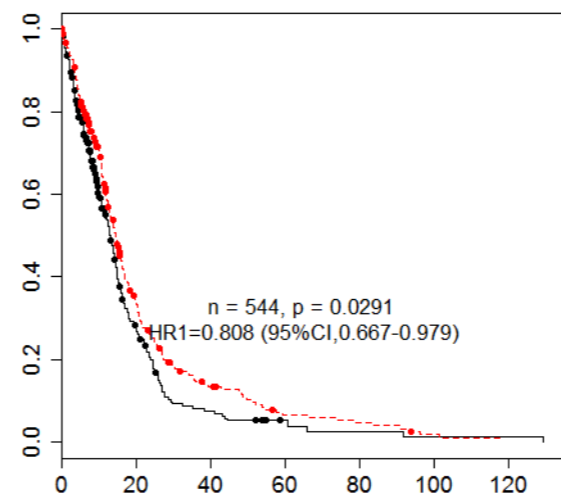

EEF2

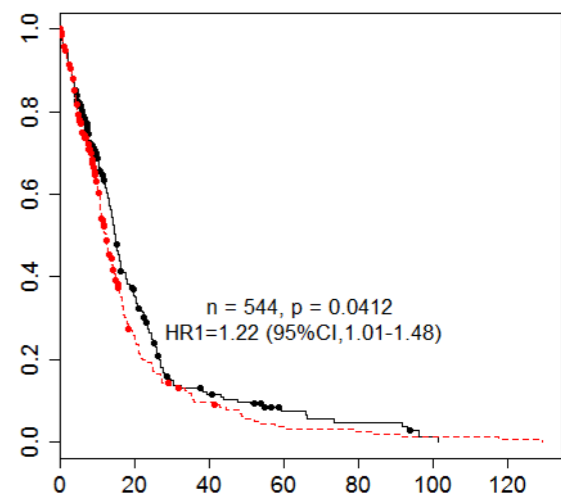

GNL3

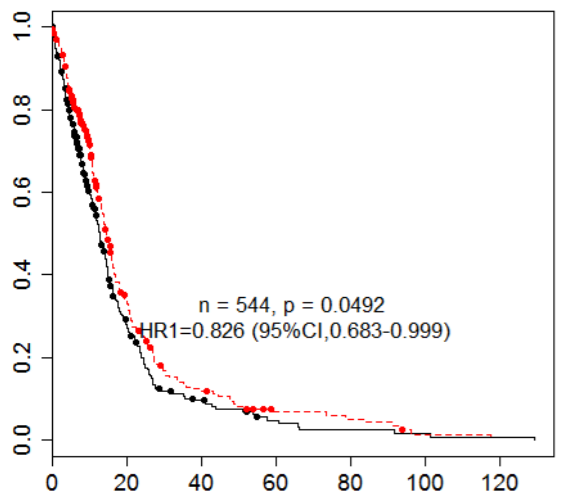

TOP1

# d. TCGA HNSC

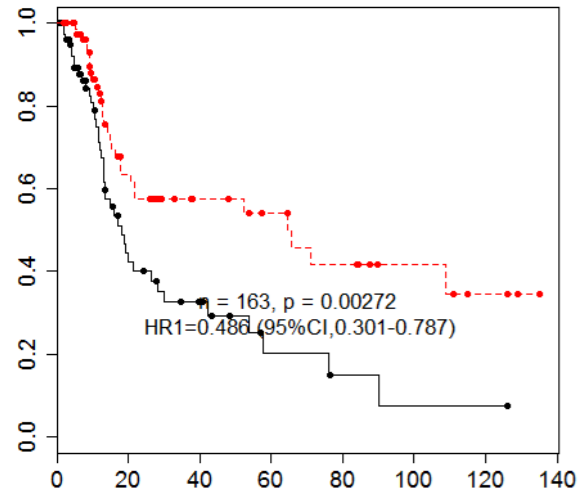

CABLES1

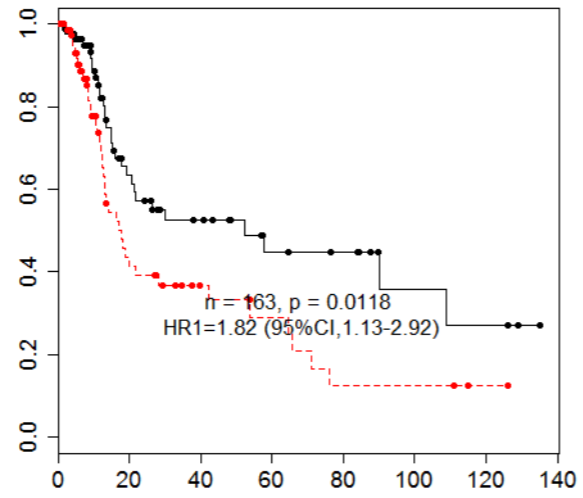

TOP1

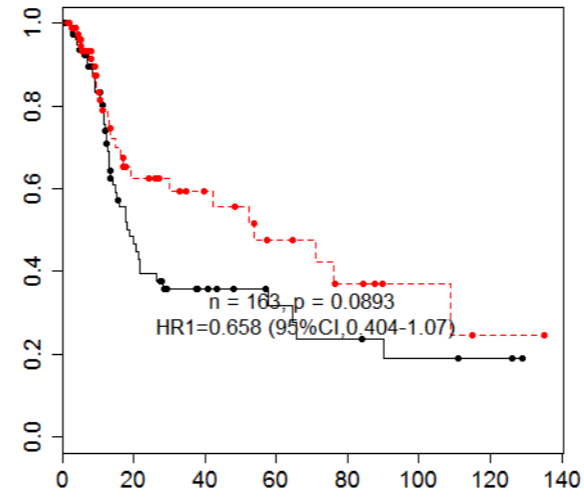

EEF2

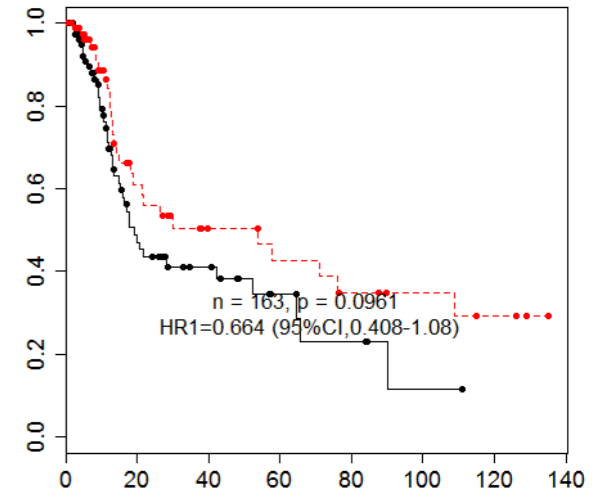

HIPK2

# e. TCGA KIRC

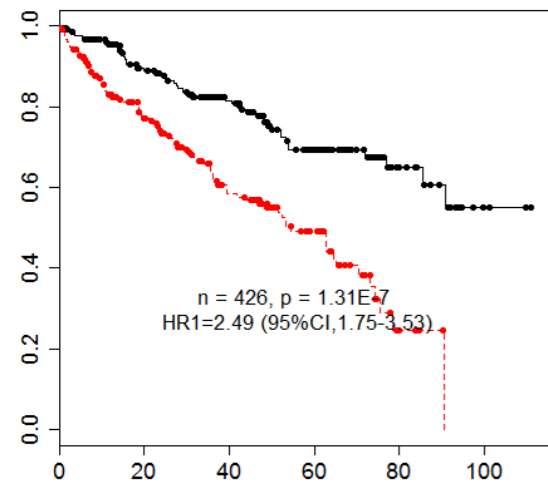

**GNL3**

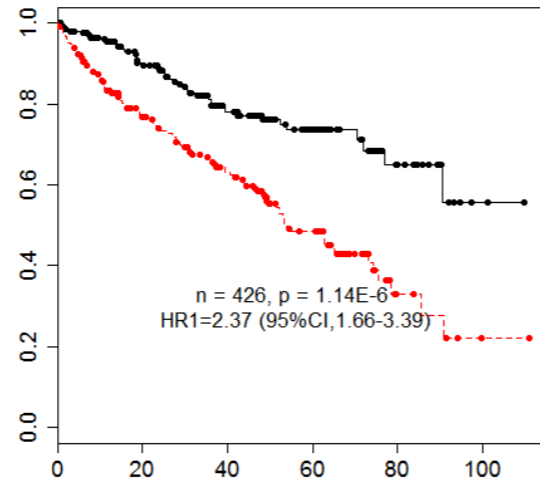

**SERPINA3**

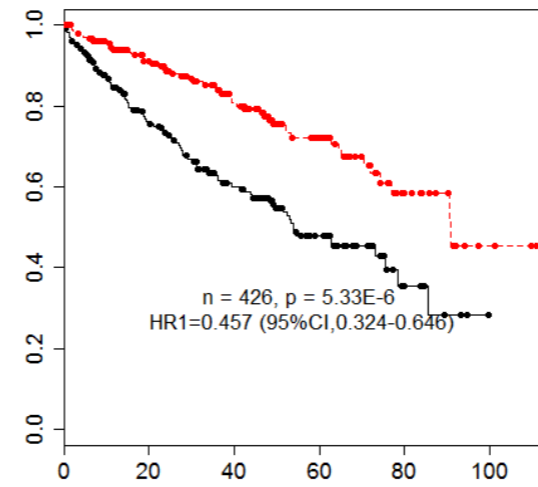

**HIPK2**

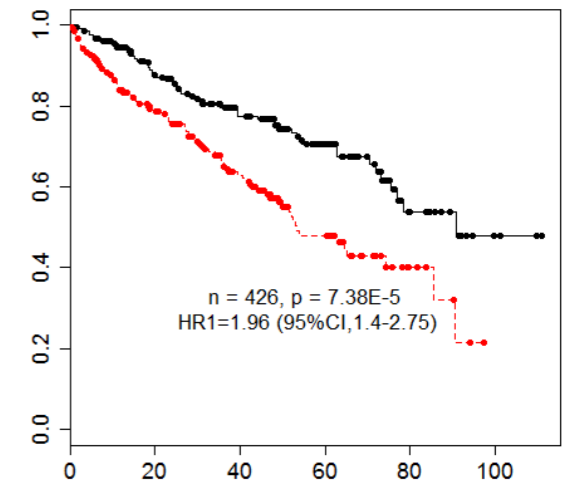

**BEST1**

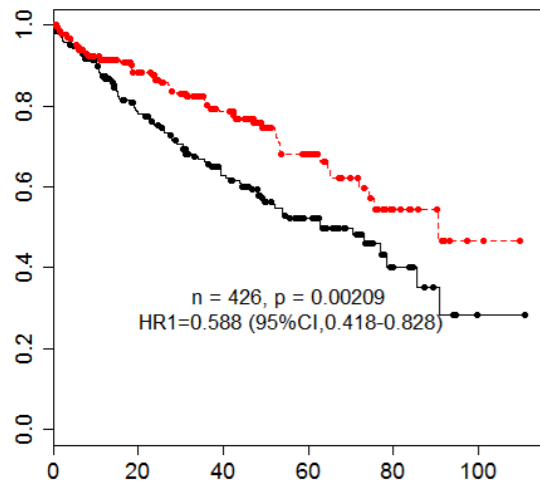

**CREBBP**

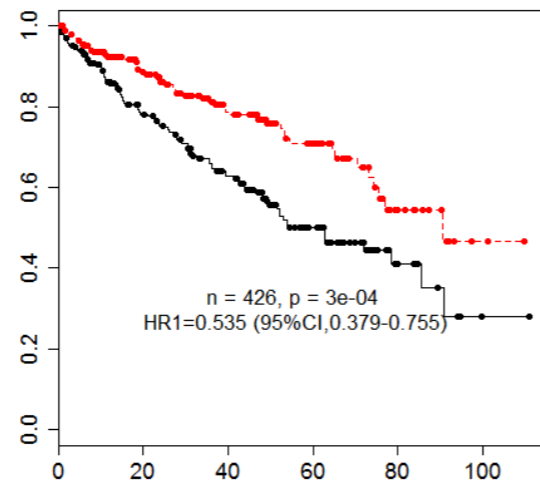

**EP300**

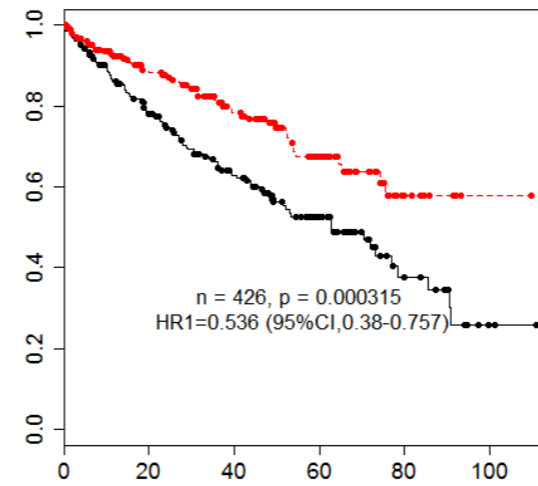

**APP**

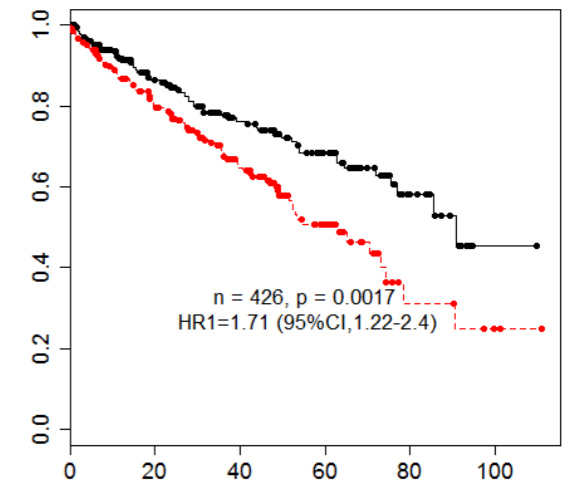

**MDM4**

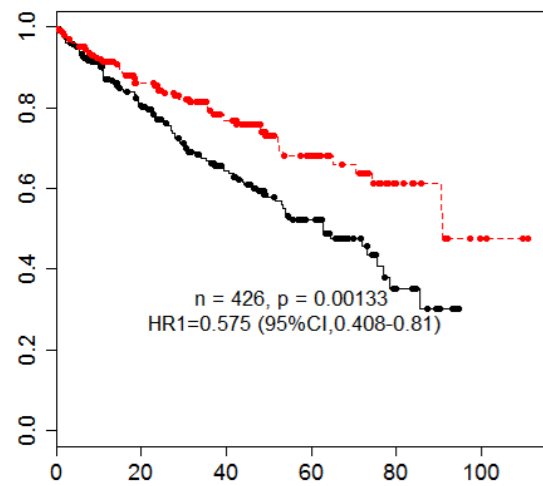

**PPP1R13B**

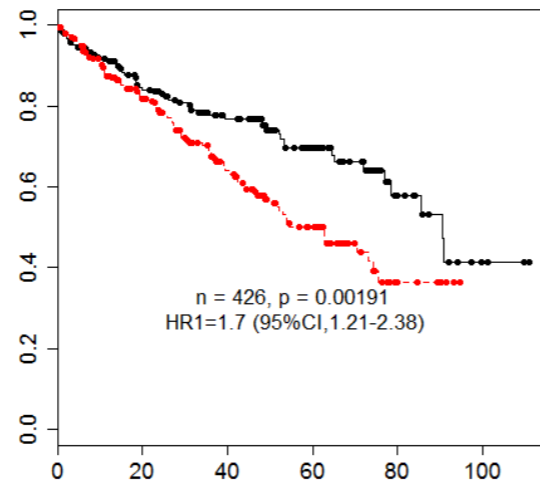

**MMP7**

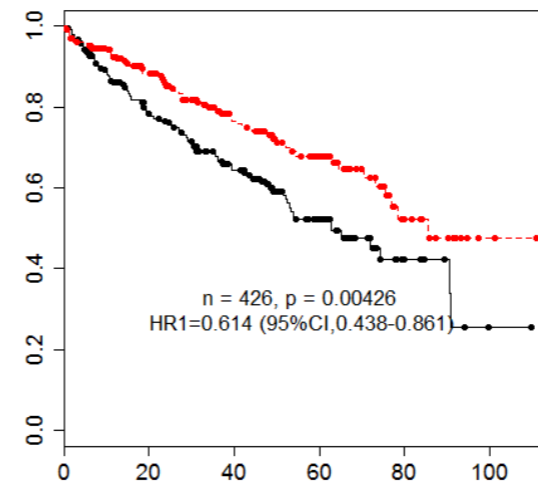

**USP33**

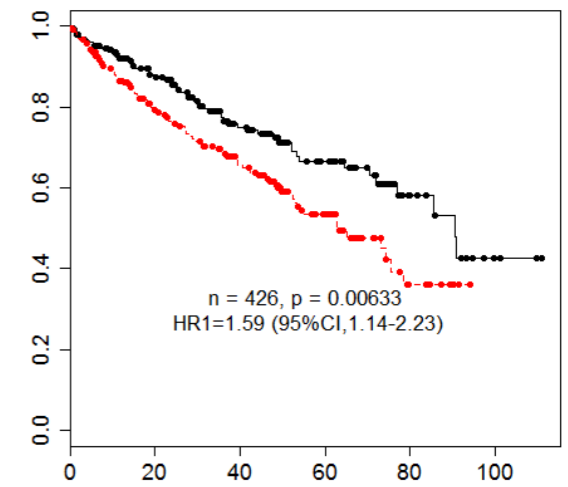

**MMP9**

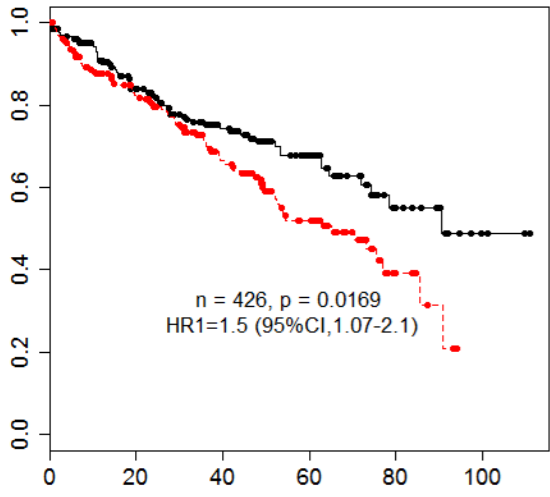

TP53

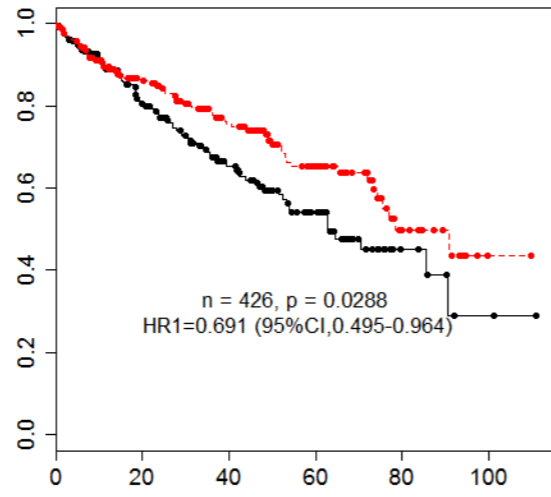

CTSG

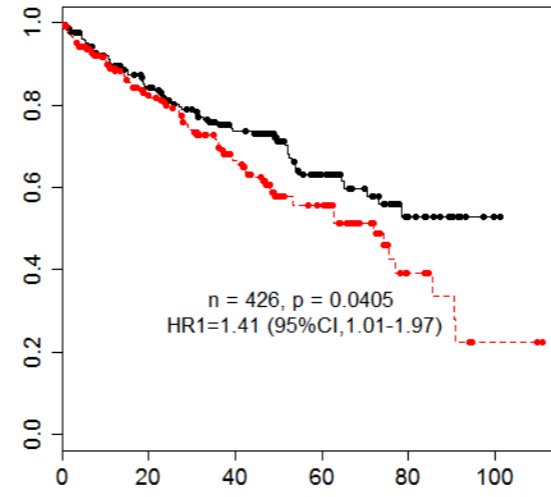

SERPINA1

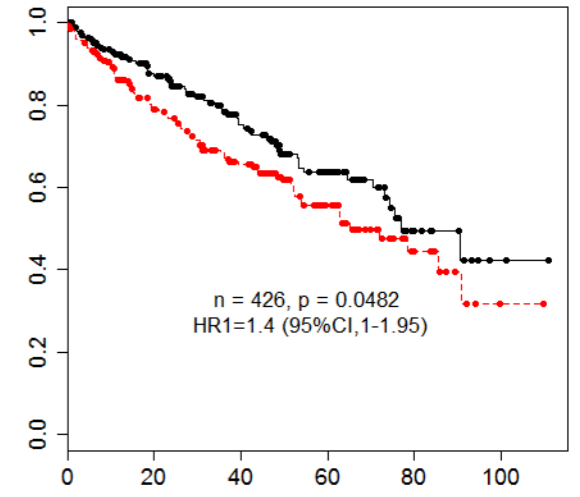

TCEB2

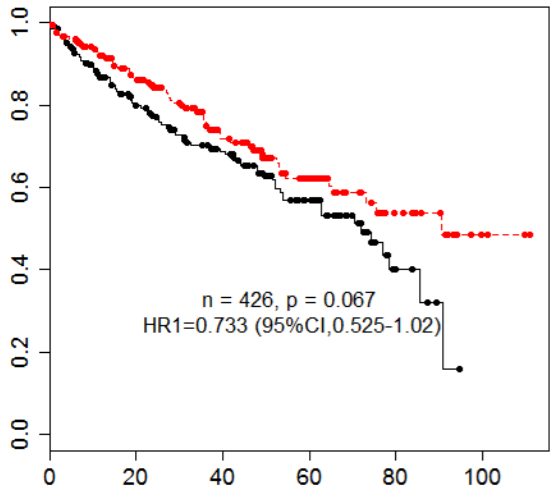

SP1

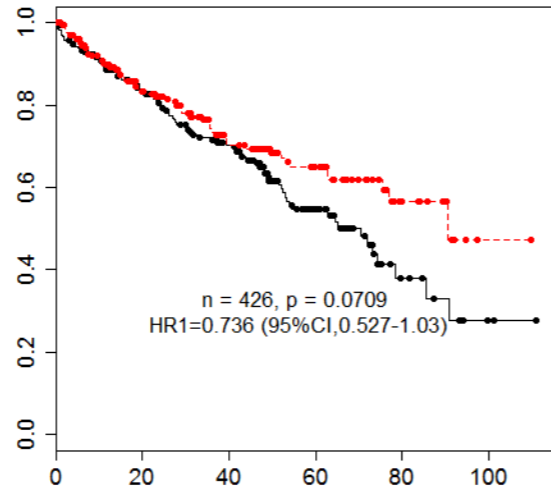

THBS1

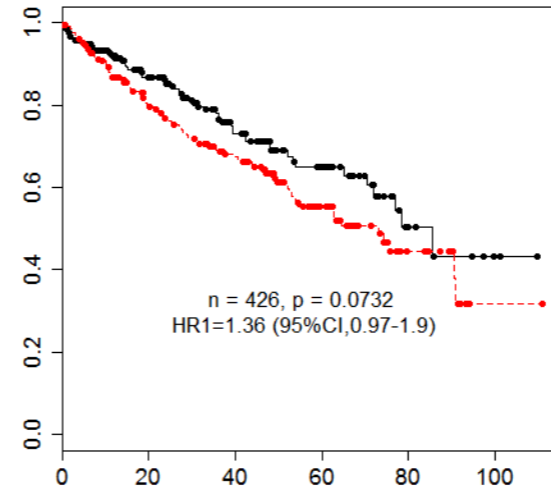

WT1

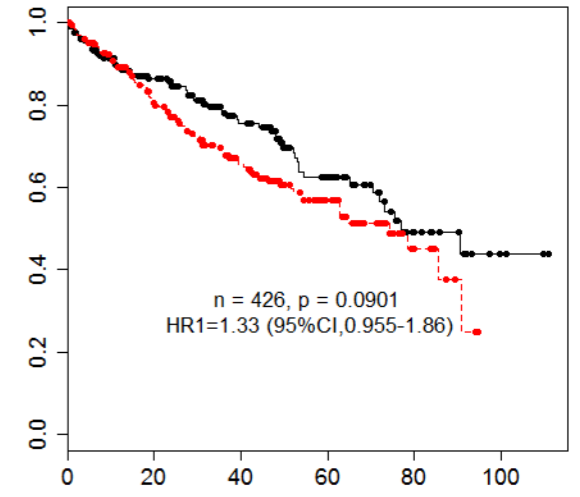

TCEB1

# f. TCGA LAML

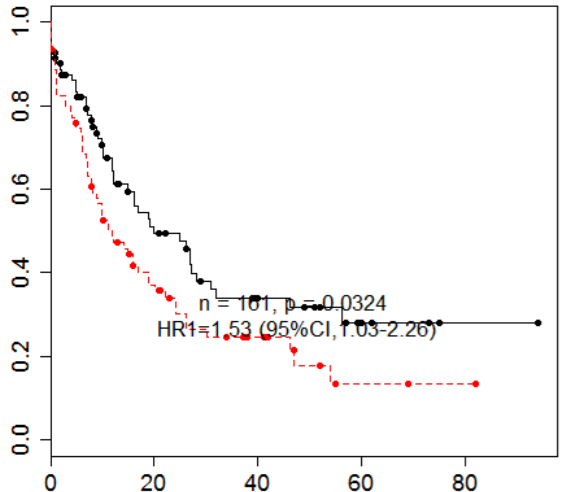

SHFM1

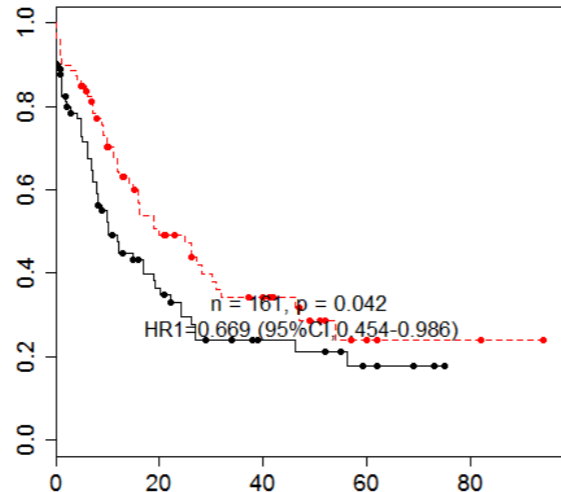

NPM1

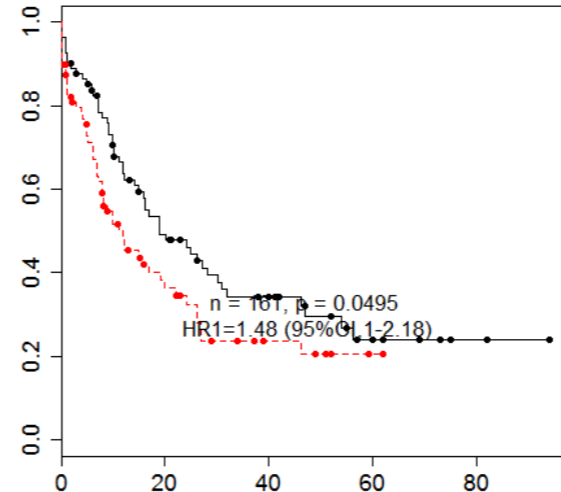

HSPA1A

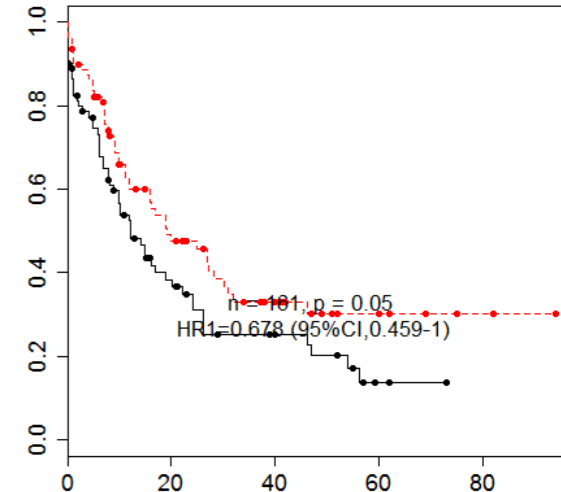

TP53

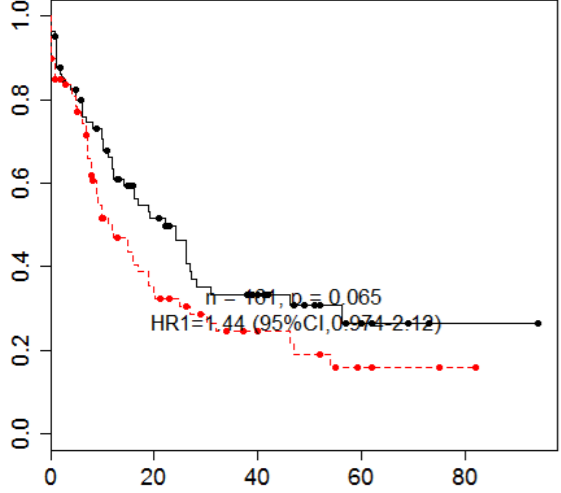

NQO1

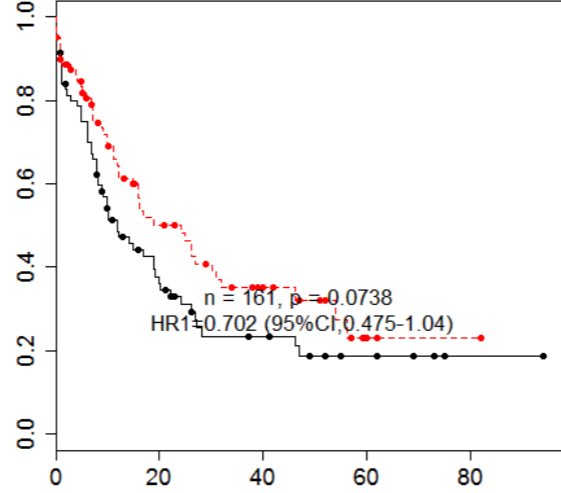

WDR16

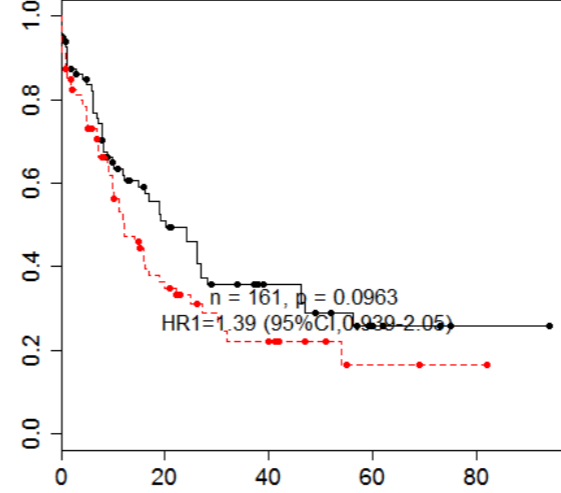

PARP1

# g. TCGA LUAD

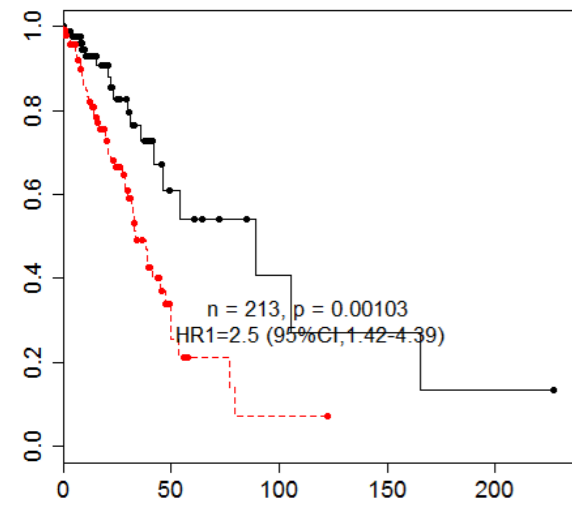

YBX1

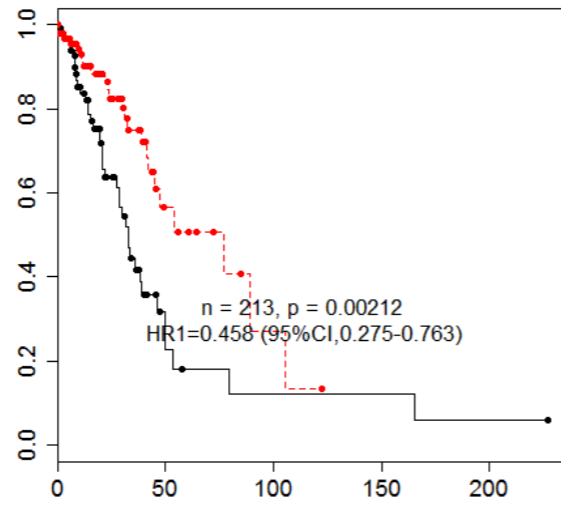

CABLES1

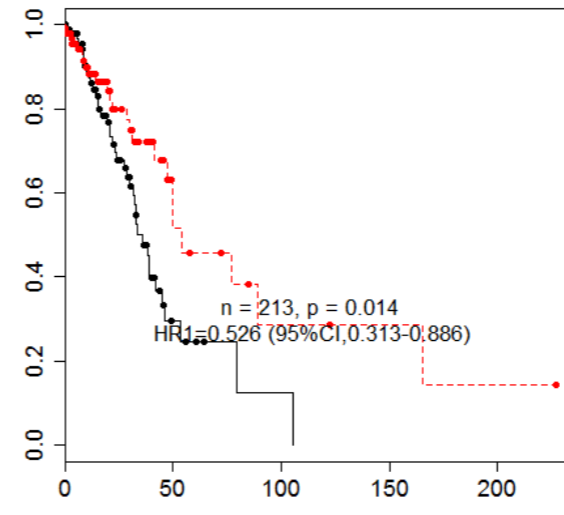

DDX5

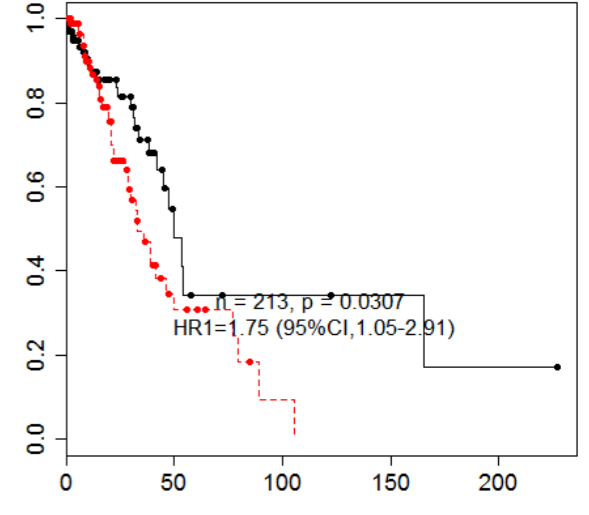

HSPA1A

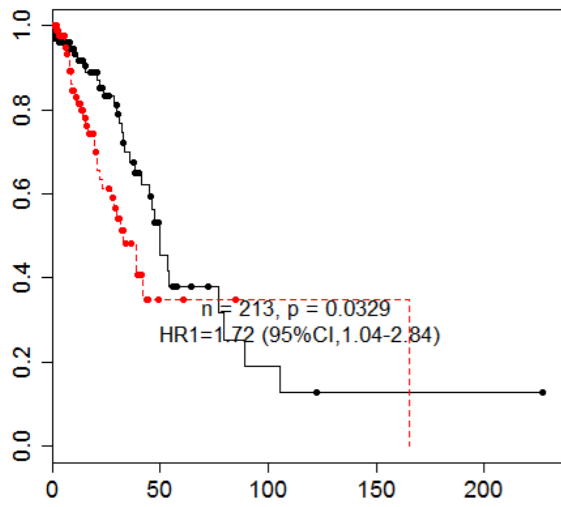

UPF3B

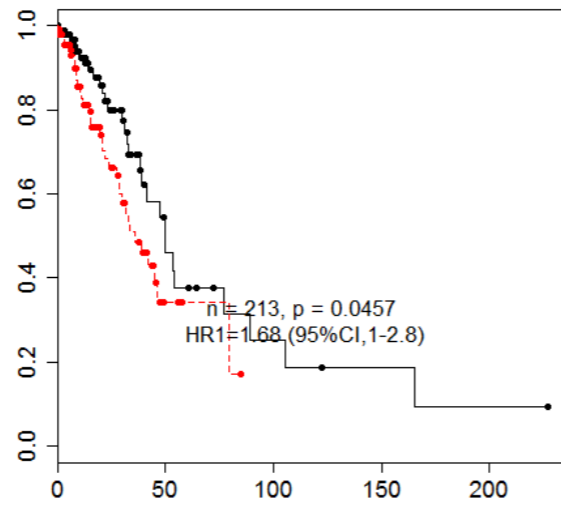

AURKA

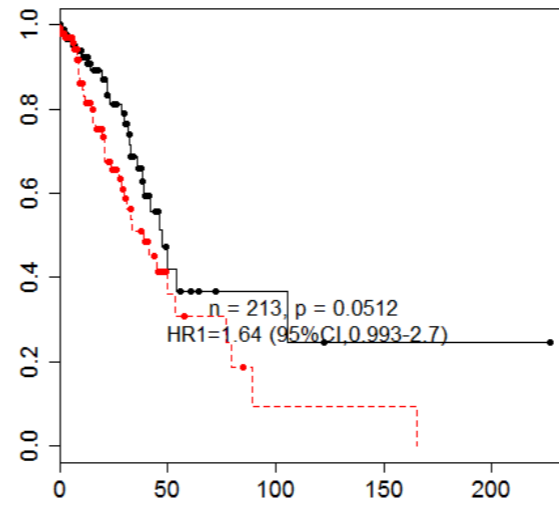

YWHAZ

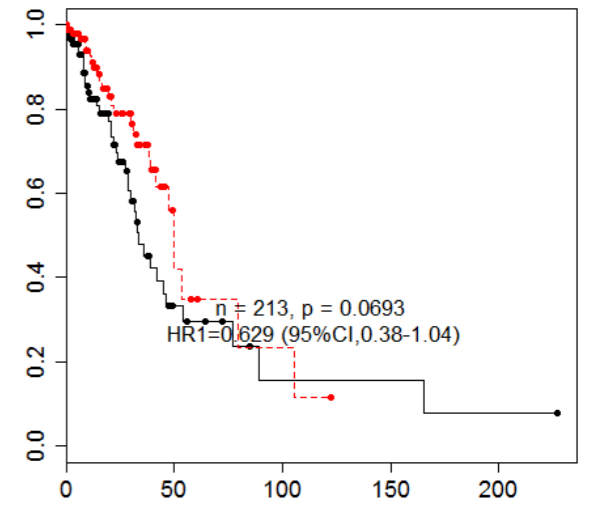

ACTC1

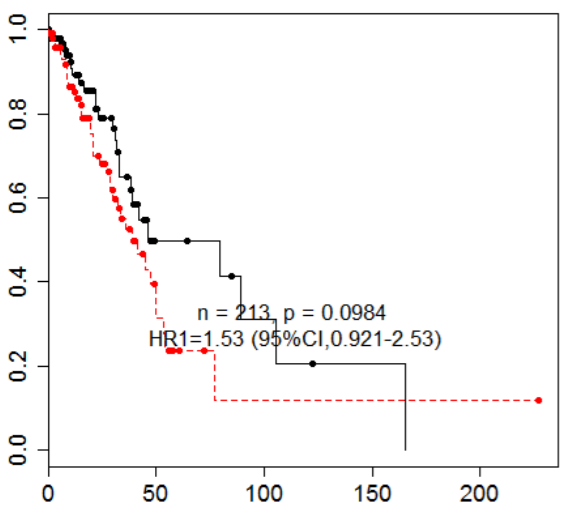

NPM1

# h.TCGA SKCM

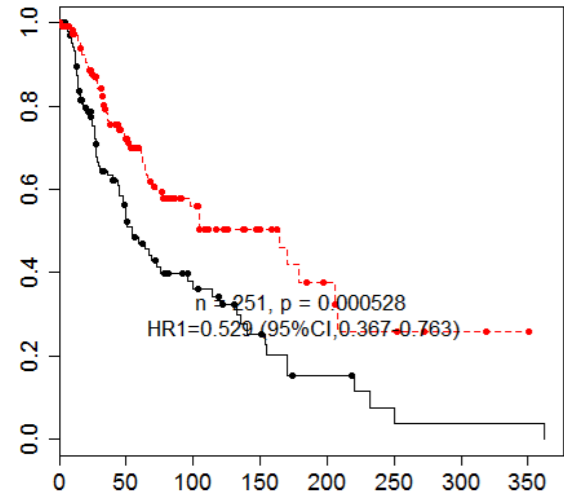

GCH1

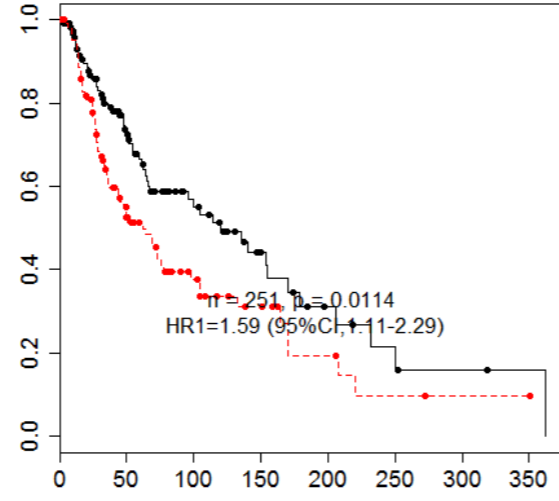

DSC1

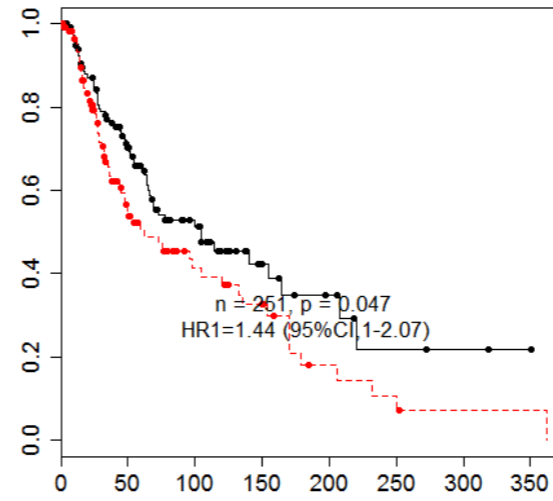

AHSA1

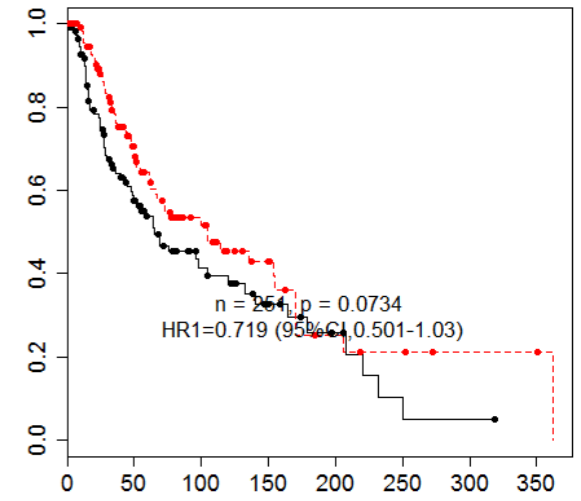

KRT18

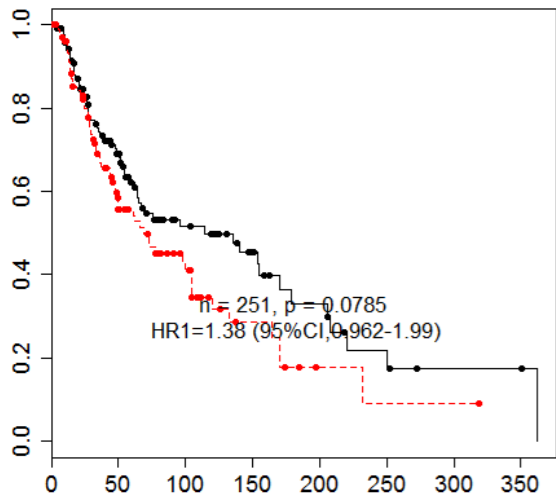

COL17A1



# i. TCGA STAD

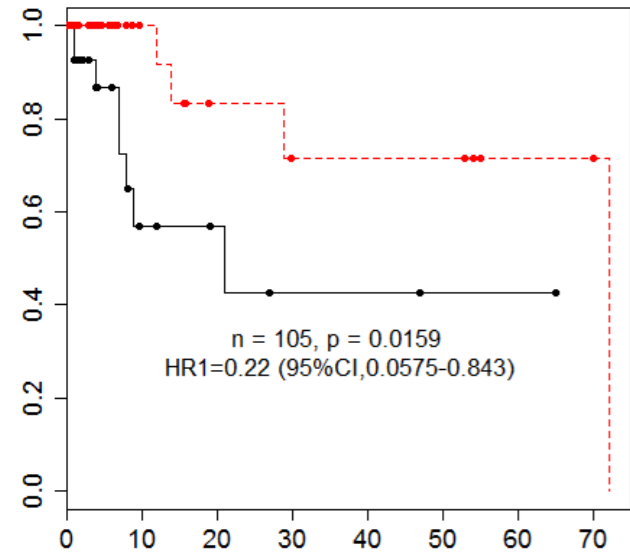

HSF1

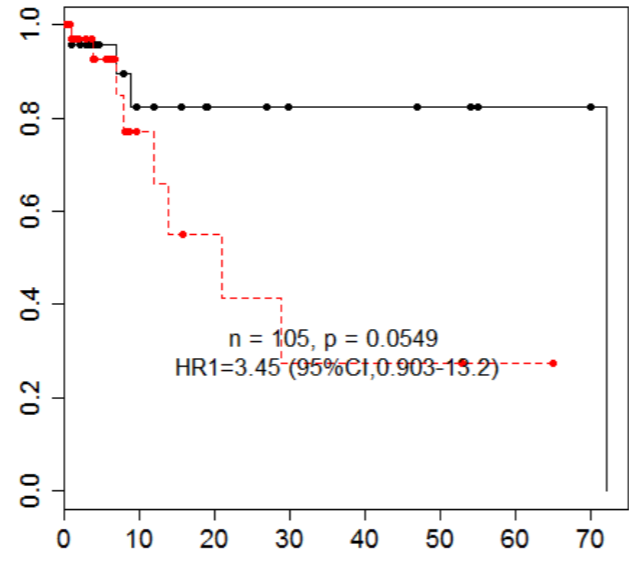

ASCC2

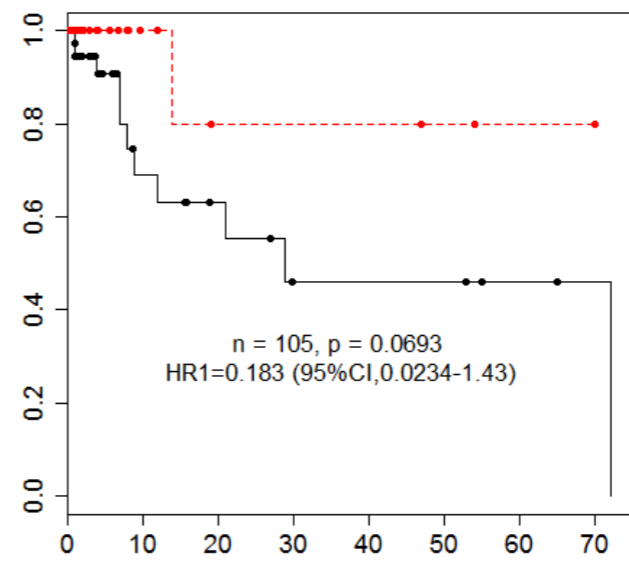

ACTA2

# j. TCGA UCEC

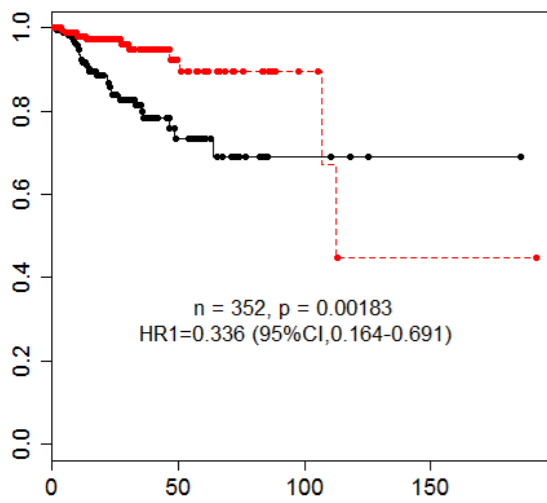

SPN

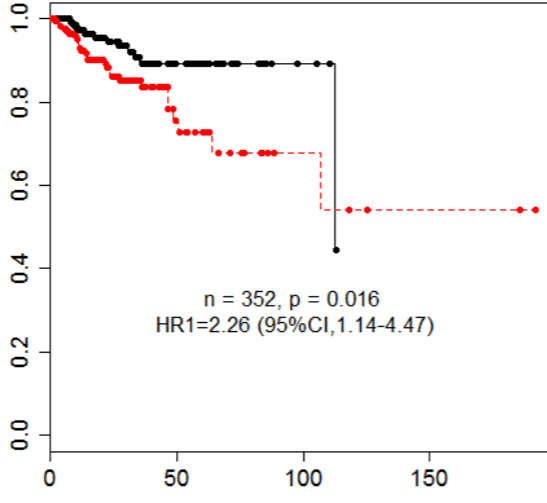

CDK6

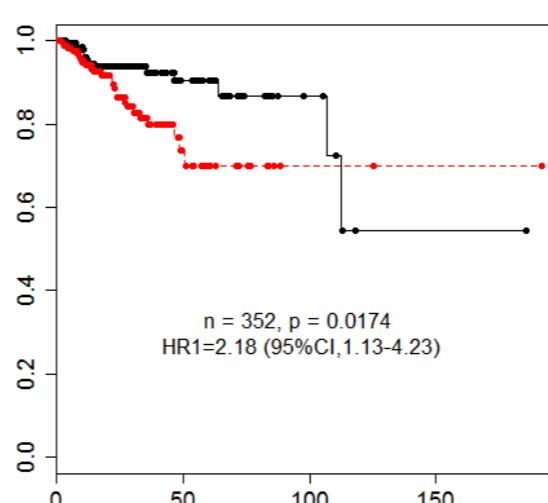

PIK3CA

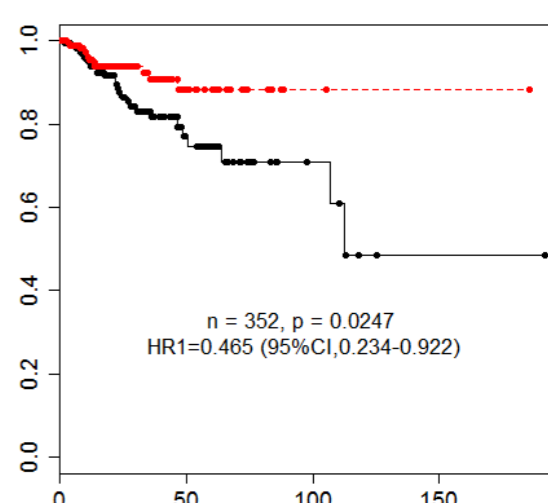

PIK3R1

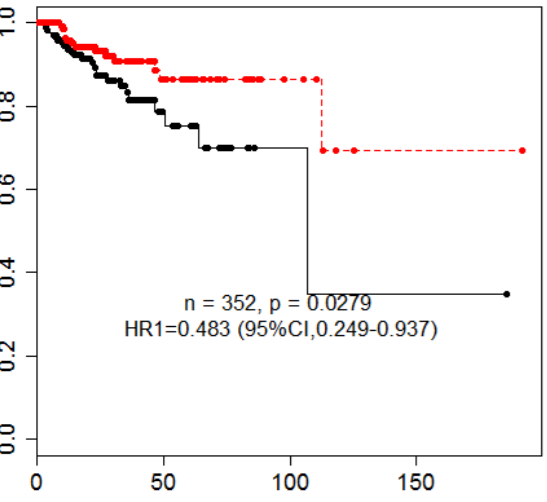

CDKN2D

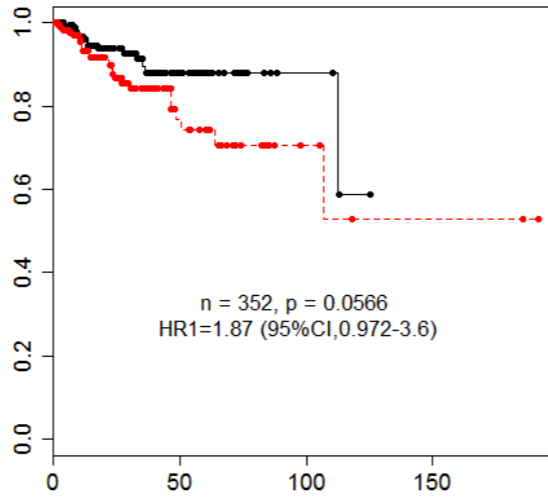

FYN

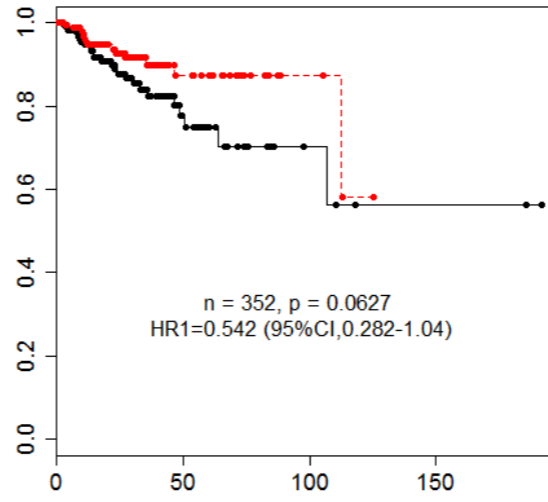

RP1

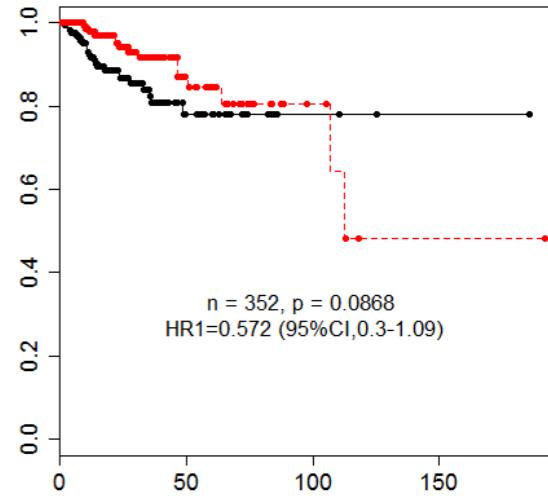

PIK3CD

# Supplementary Figure 6

## Patient stratification using original pathway annotations

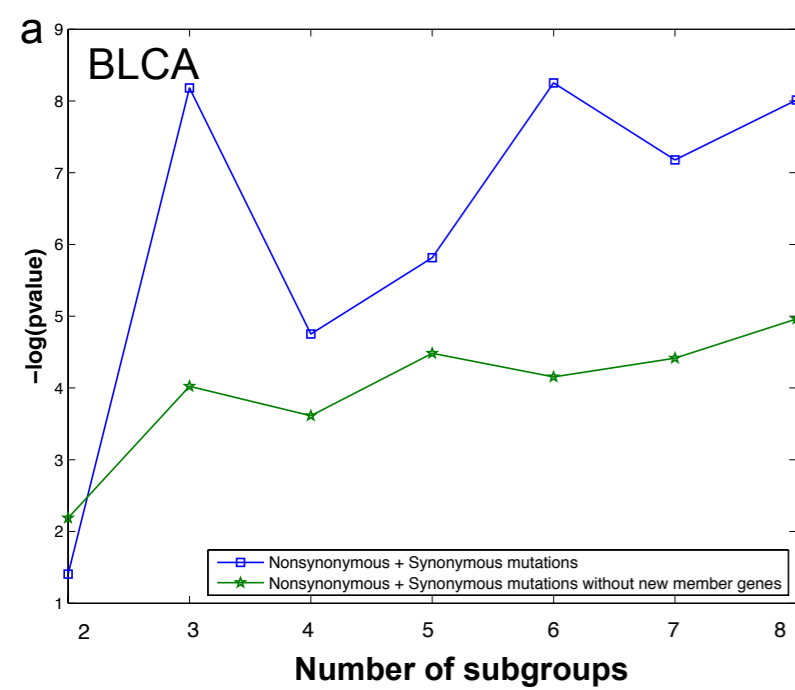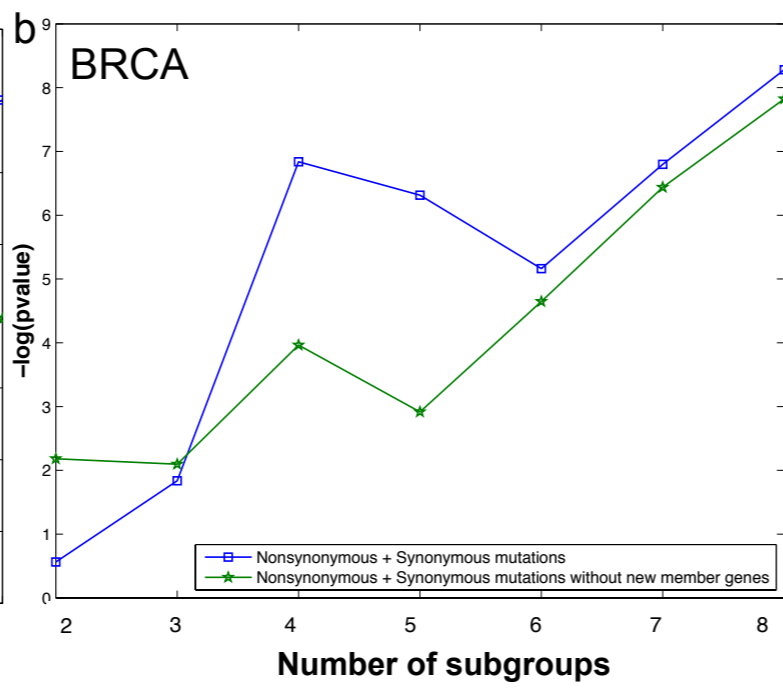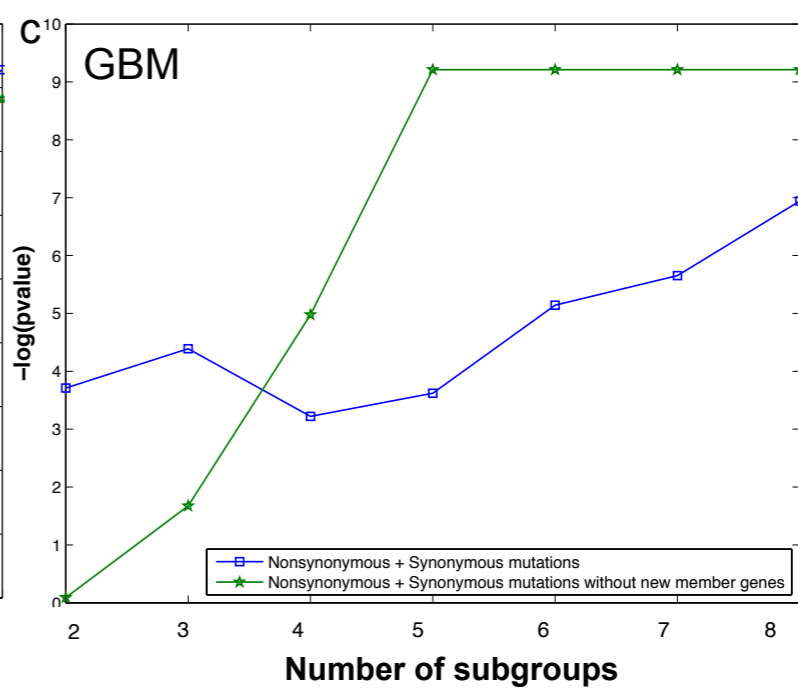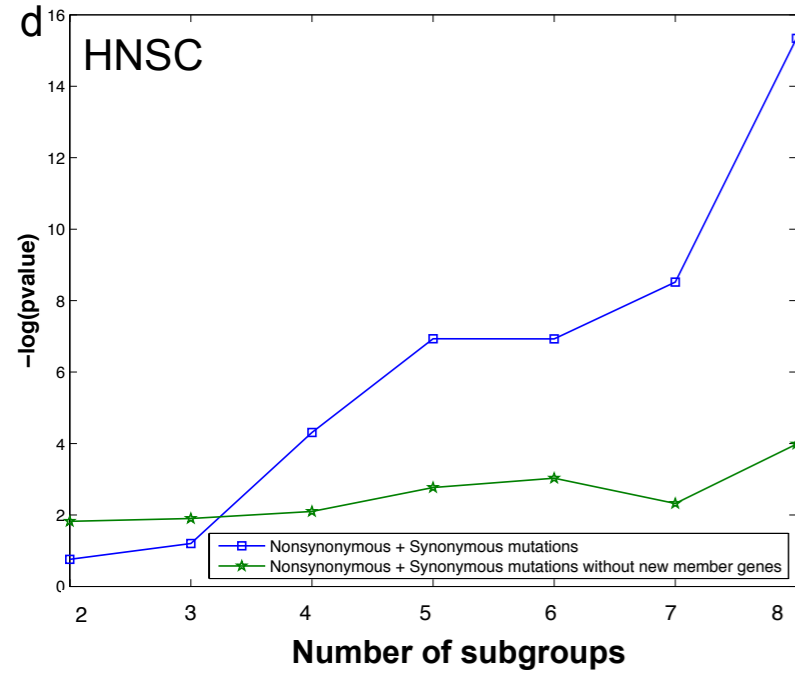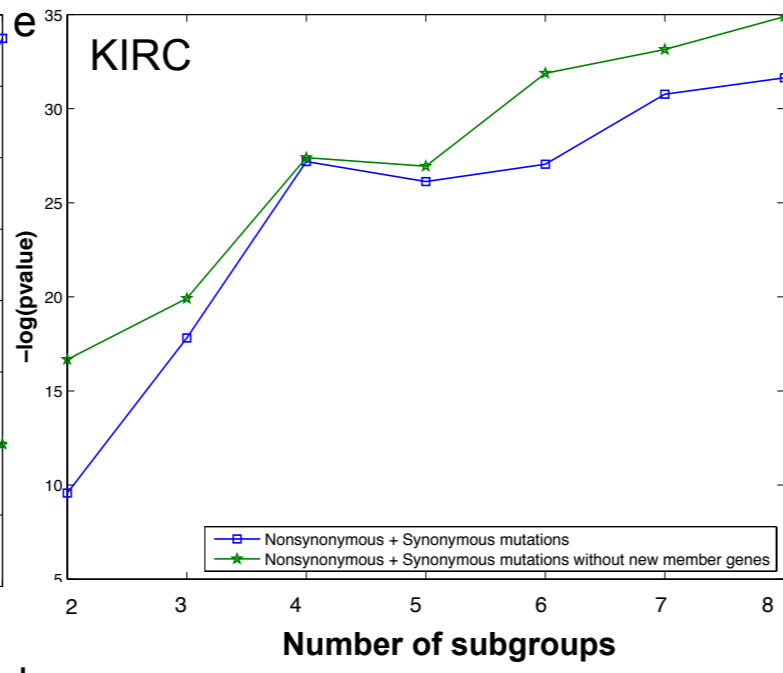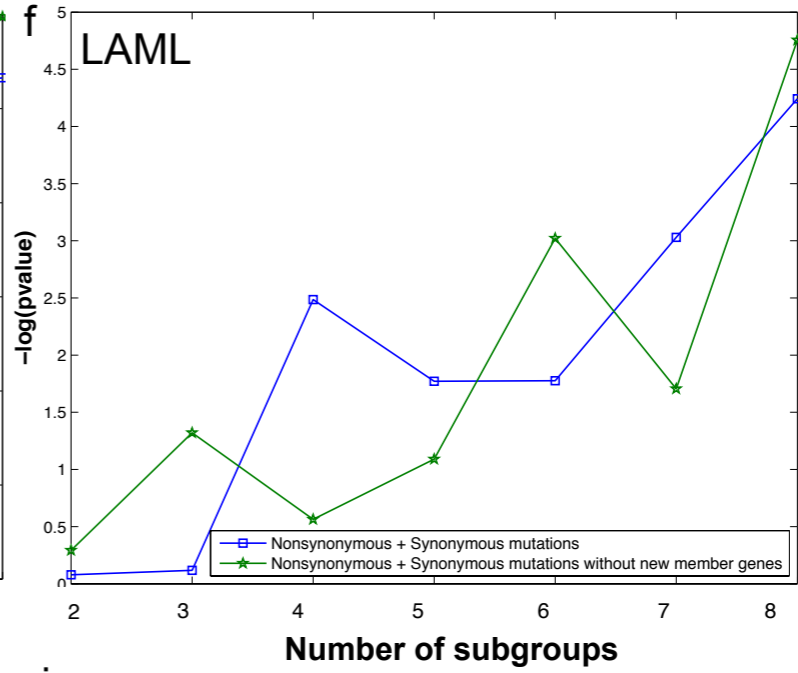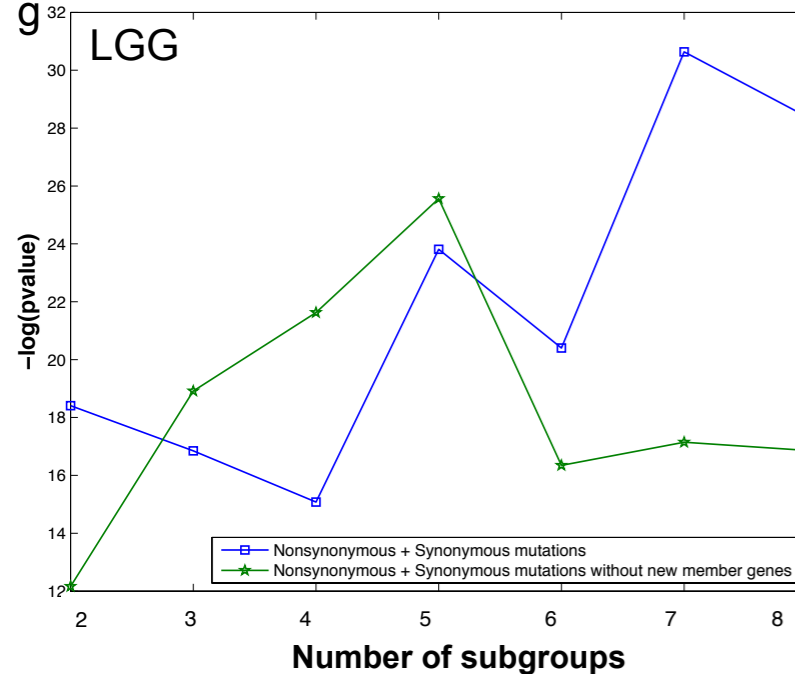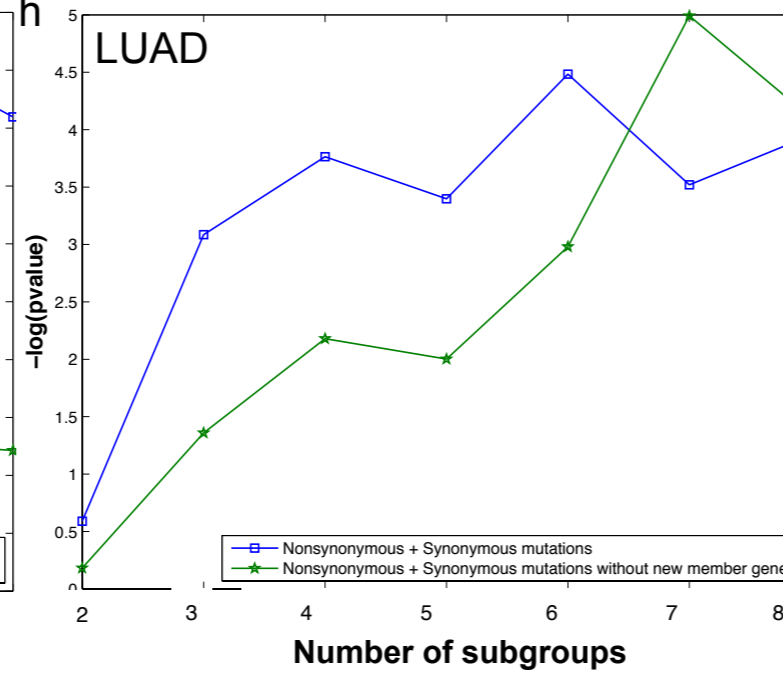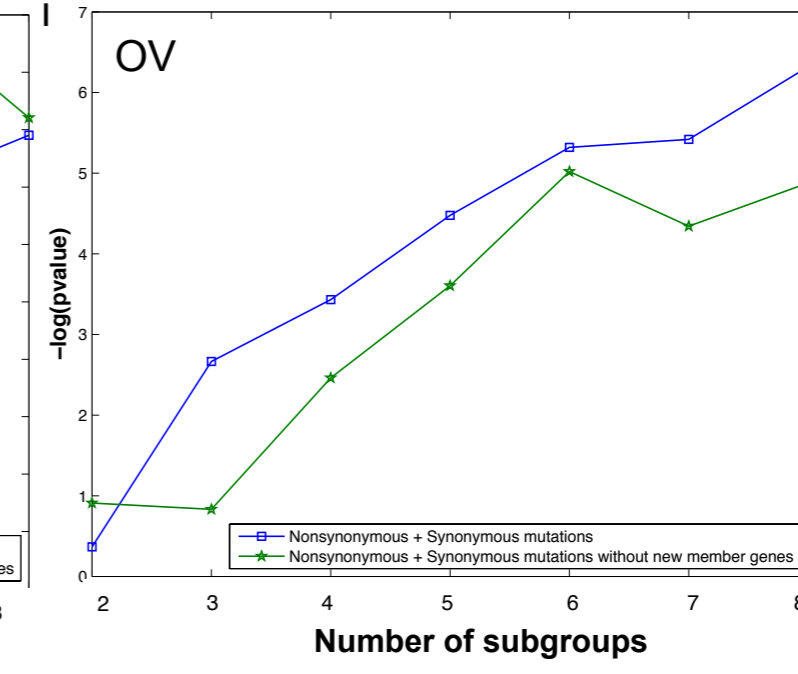

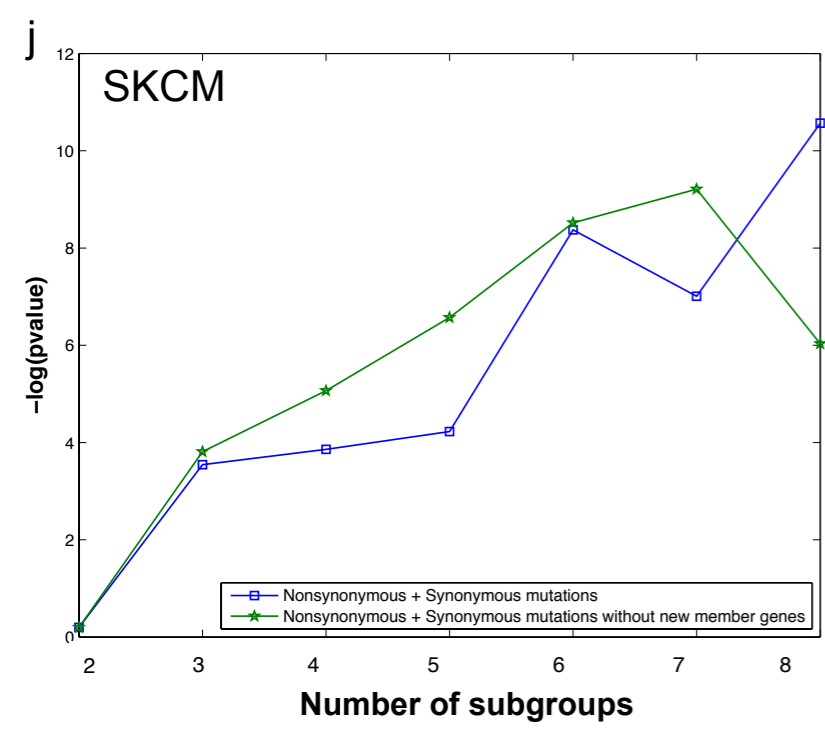

# Supplementary Figure 7

Patient stratification exclusively using non-synonymous mutation

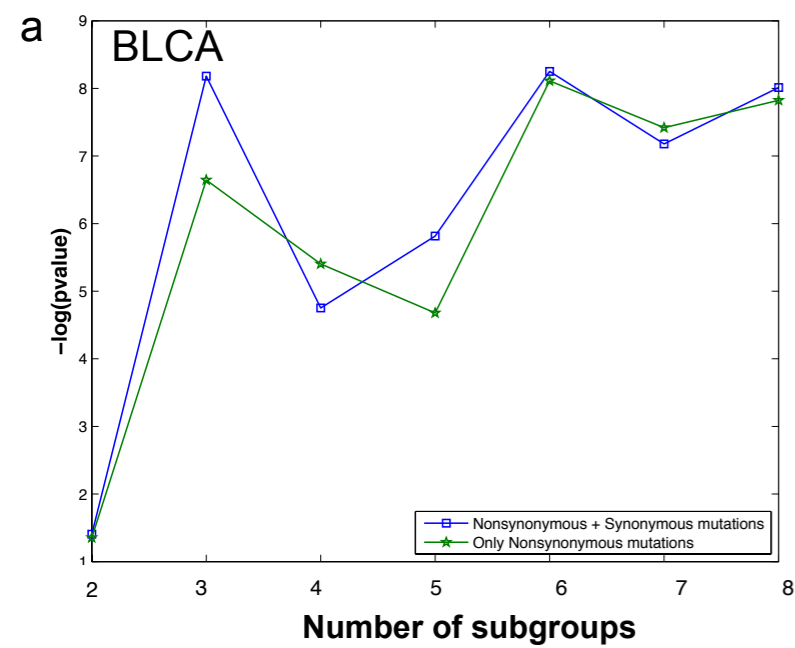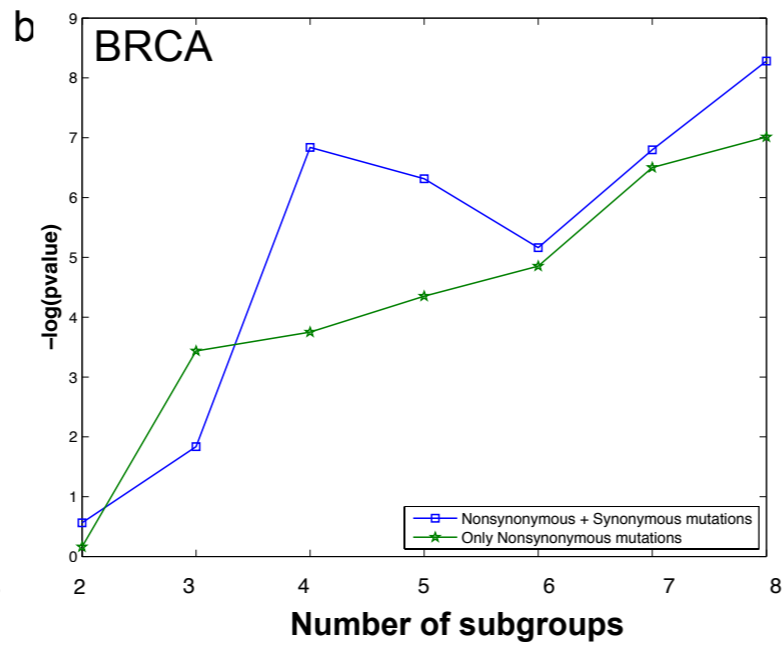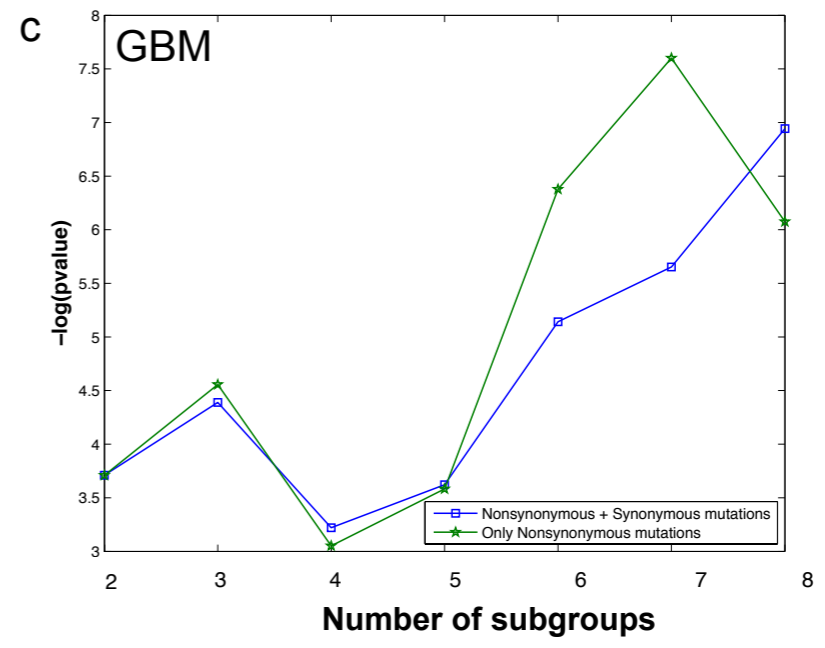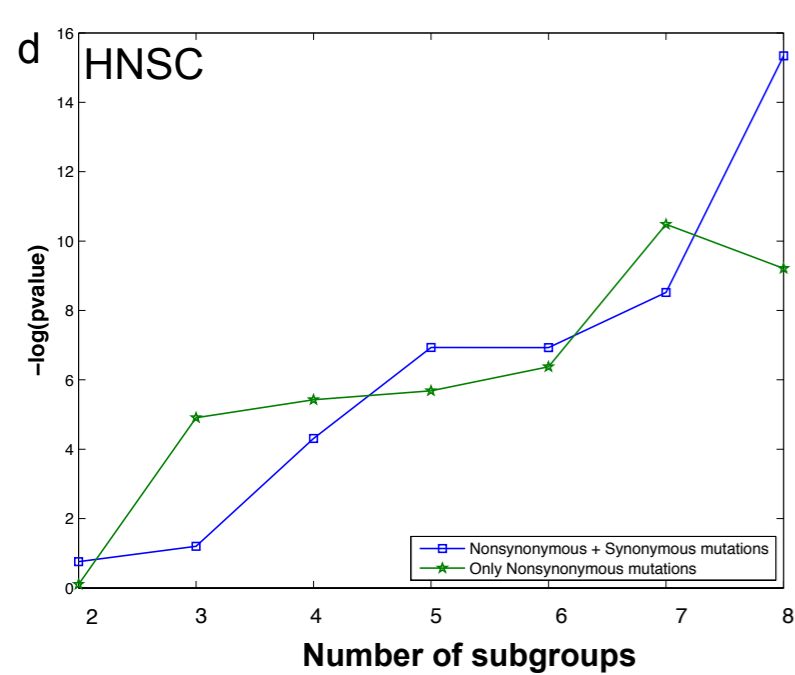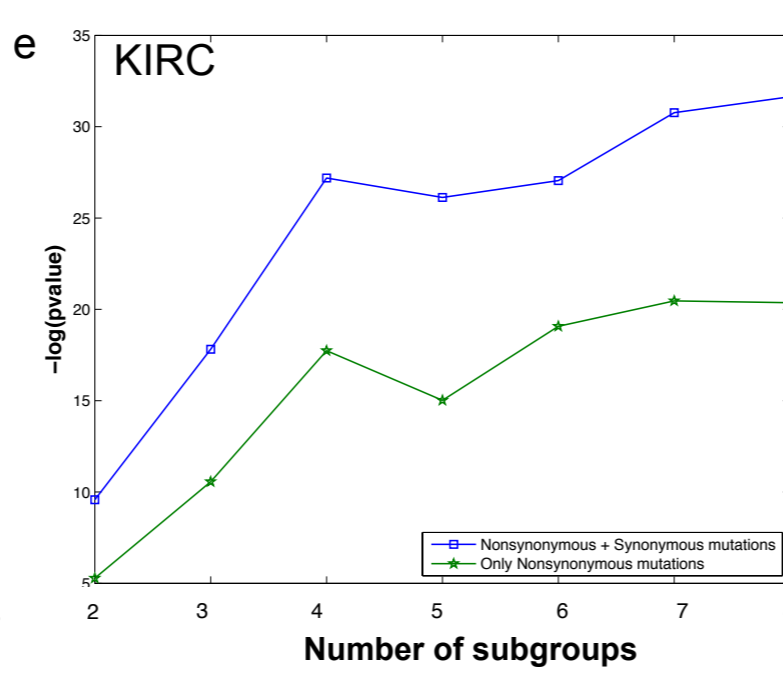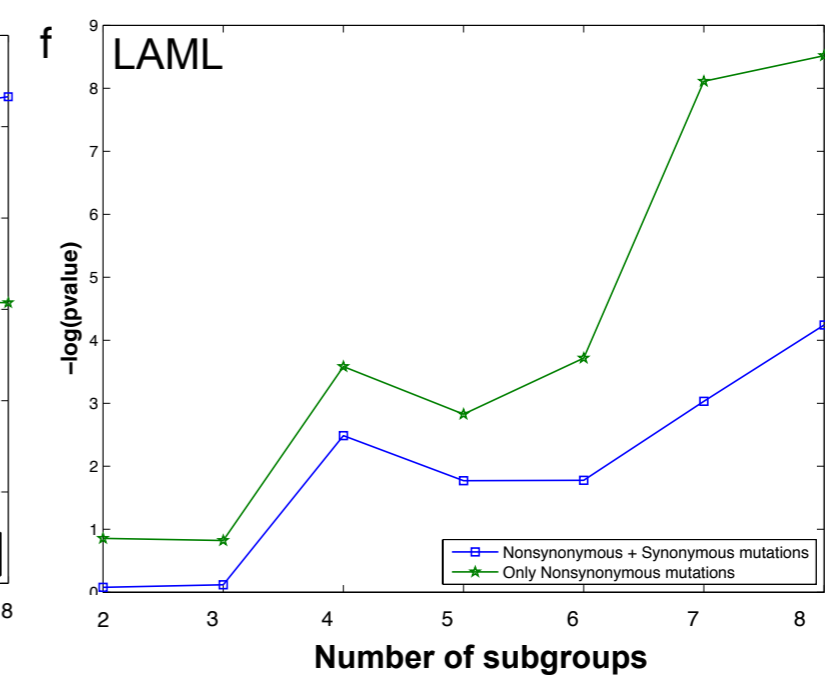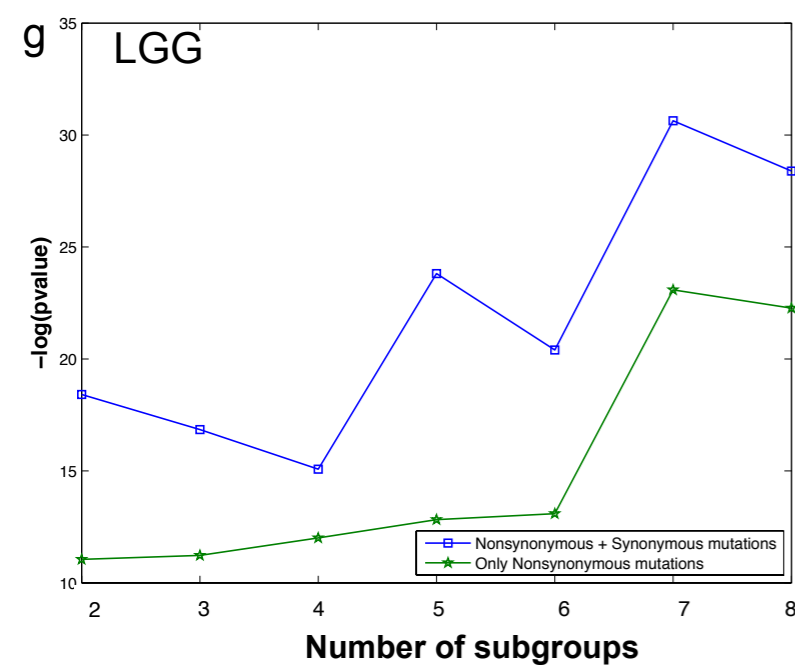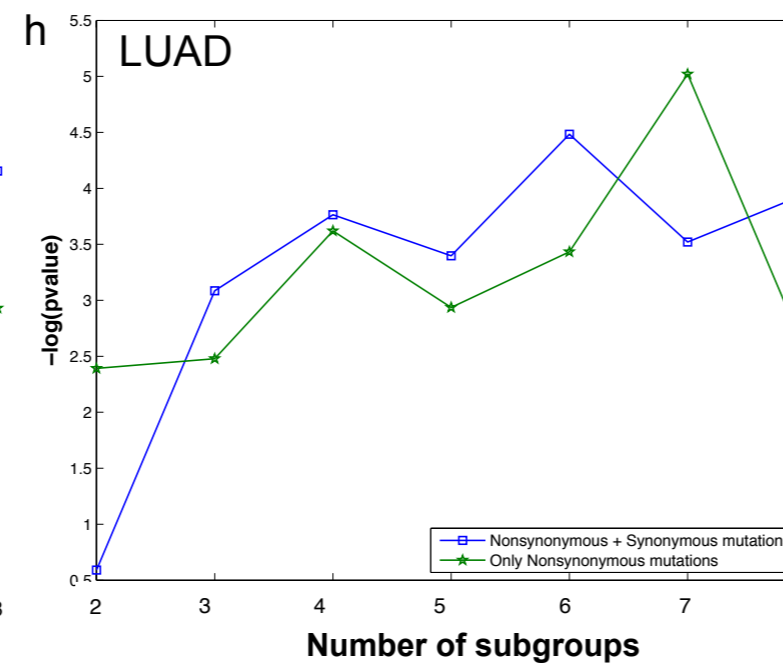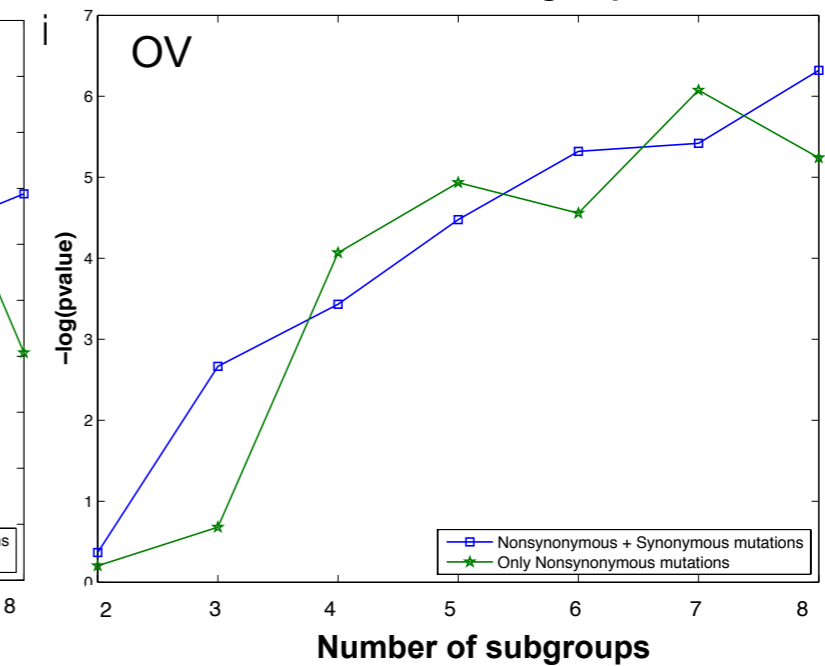

j

SKCM

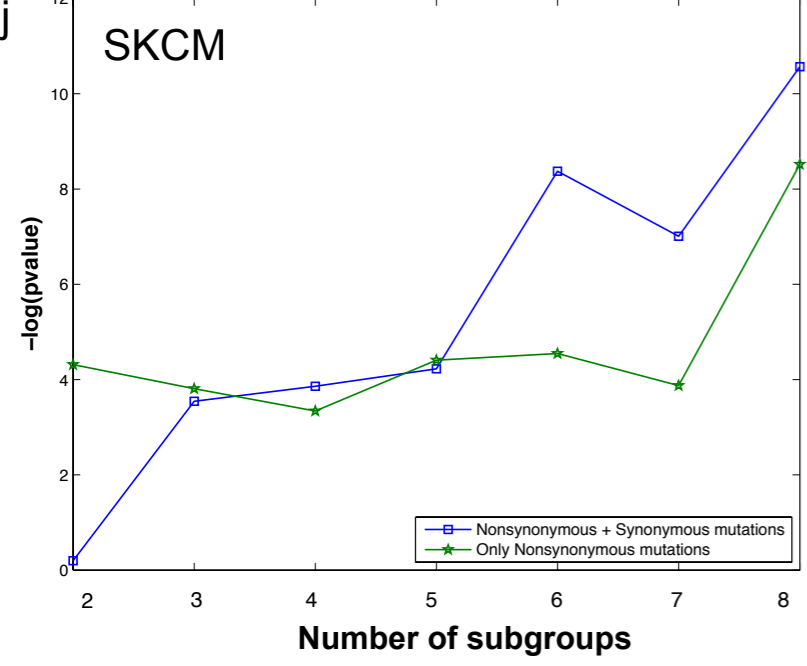

Supplement: supp_btv692_Supplementary_Figure_revised.pdf [file supp_btv692_Supplementary_Figure_revised.pdf]
